# Supplementary material for: Exposure to elevated sea-surface temperatures below the bleaching threshold impairs coral recovery and regeneration following injury
Source: PeerJ. 2017 Aug 18;5:e3719. doi: 10.7717/peerj.3719 (PMC5564385; doi:10.7717/peerj.3719)
Supplement: Supplemental Information 1 — Raw gene expression statistics for Catalase, HSP90 and HSP70. [file peerj-05-3719-s001.xlsx]

## Sheet: Sheet1
* Generalized Linear Models.
GENLIN Catalase BY Temperature Injured Timepoint (ORDER=ASCENDING)
/MODEL Temperature Injured Timepoint Injured*Timepoint Temperature*Timepoint
Temperature*Injured*Timepoint INTERCEPT=YES
DISTRIBUTION=NORMAL LINK=IDENTITY
/CRITERIA SCALE=MLE COVB=MODEL PCONVERGE=1E-006(ABSOLUTE) SINGULAR=1E-012 ANALYSISTYPE=3(WALD)
CILEVEL=95 CITYPE=WALD LIKELIHOOD=FULL
/EMMEANS SCALE=ORIGINAL
/EMMEANS TABLES=Temperature SCALE=ORIGINAL COMPARE=Temperature CONTRAST=PAIRWISE
PADJUST=SEQBONFERRONI
/EMMEANS TABLES=Injured SCALE=ORIGINAL COMPARE=Injured CONTRAST=PAIRWISE PADJUST=SEQBONFERRONI
/EMMEANS TABLES=Timepoint SCALE=ORIGINAL COMPARE=Timepoint CONTRAST=PAIRWISE PADJUST=SEQBONFERRONI
/EMMEANS TABLES=Injured*Timepoint SCALE=ORIGINAL COMPARE=Injured*Timepoint CONTRAST=PAIRWISE
PADJUST=SEQBONFERRONI
/EMMEANS TABLES=Temperature*Timepoint SCALE=ORIGINAL COMPARE=Temperature*Timepoint
CONTRAST=PAIRWISE PADJUST=SEQBONFERRONI
/EMMEANS TABLES=Temperature*Injured*Timepoint SCALE=ORIGINAL
COMPARE=Temperature*Injured*Timepoint CONTRAST=PAIRWISE PADJUST=SEQBONFERRONI
/MISSING CLASSMISSING=EXCLUDE
/PRINT CPS DESCRIPTIVES MODELINFO FIT SUMMARY SOLUTION.
Generalized Linear Models
Notes
Output Created		08-MAR-2017 13:09:05
Comments
Input	Data	/Bill/JCU/Paper/Josh Injury paper/Josh PCR stats.sav
	Active Dataset	DataSet1
	Filter	<none>
	Weight	<none>
	Split File	<none>
	N of Rows in Working Data File	122
Missing Value Handling	Definition of Missing	User-defined missing values for factor, subject and within-subject variables are treated as missing.
	Cases Used	Statistics are based on cases with valid data for all variables in the model.
Weight Handling		not applicable
Syntax		GENLIN Catalase BY Temperature Injured Timepoint (ORDER=ASCENDING) /MODEL Temperature Injured Timepoint Injured*Timepoint Temperature*Timepoint Temperature*Injured*Timepoint INTERCEPT=YES DISTRIBUTION=NORMAL LINK=IDENTITY /CRITERIA SCALE=MLE COVB=MODEL PCONVERGE=1E-006(ABSOLUTE) SINGULAR=1E-012 ANALYSISTYPE=3(WALD) CILEVEL=95 CITYPE=WALD LIKELIHOOD=FULL /EMMEANS SCALE=ORIGINAL /EMMEANS TABLES=Tem…
Resources	Processor Time	00:00:00.58
	Elapsed Time	00:00:00.00
Model Information
Dependent Variable	Catalase
Probability Distribution	Normal
Link Function	Identity
Case Processing Summary
	N	Percent
Included	100	0.819672
Excluded	22	0.180328
Total	122	1
Categorical Variable Information
			N	Percent
Factor	Temperature	Control	50	0.5
		Heated	50	0.5
		Total	100	1
	Injured	Cut	50	0.5
		Intact	50	0.5
		Total	100	1
	Timepoint	1	13	0.13
		2	15	0.15
		3	18	0.18
		4	18	0.18
		5	20	0.2
		6	16	0.16
		Total	100	1
Continuous Variable Information
		N	Minimum	Maximum	Mean	Std. Deviation
Dependent Variable	Catalase	100	0.00168716	4527.8	111.43	569.735
Goodness of Fita
	Value	df	Value/df
Deviance	6.90676e+06	76	90878.5
Scaled Deviance	100	76
Pearson Chi-Square	6.90676e+06	76	90878.5
Scaled Pearson Chi-Square	100	76
Log Likelihoodb	-699.036
Akaike's Information Criterion (AIC)	1448.07
Finite Sample Corrected AIC (AICC)	1465.64
Bayesian Information Criterion (BIC)	1513.2
Consistent AIC (CAIC)	1538.2
Dependent Variable: Catalase Model: (Intercept), Temperature, Injured, Timepoint, Injured * Timepoint, Temperature * Timepoint, Temperature * Injured * Timepoint
a. Information criteria are in smaller-is-better form.
b. The full log likelihood function is displayed and used in computing information criteria.
Omnibus Testa
Likelihood Ratio Chi-Square	df	Sig.
153.745	23	0
Dependent Variable: Catalase Model: (Intercept), Temperature, Injured, Timepoint, Injured * Timepoint, Temperature * Timepoint, Temperature * Injured * Timepoint
a. Compares the fitted model against the intercept-only model.
Tests of Model Effects
Source	Type III
	Wald Chi-Square	df	Sig.
(Intercept)	29.8661	1	4.62946e-08
Temperature	19.5925	1	9.58436e-06
Injured	19.2014	1	1.17628e-05
Timepoint	111.361	5	0
Injured * Timepoint	81.3904	5	4.44089e-16
Temperature * Timepoint	120.416	5	0
Temperature * Injured * Timepoint	97.9282	6	0
Dependent Variable: Catalase Model: (Intercept), Temperature, Injured, Timepoint, Injured * Timepoint, Temperature * Timepoint, Temperature * Injured * Timepoint
Parameter Estimates
Parameter	B	Std. Error	95% Wald Confidence Interval		Hypothesis Test
			Lower	Upper	Wald Chi-Square	df	Sig.
(Intercept)	0.696392	131.404	-256.85	258.243	2.80862e-05	1	0.995772
[Temperature=Control ]	228.075	185.833	-136.151	592.3	1.5063	1	0.219705
[Temperature=Heated ]	0a
[Injured=Cut ]	-0.316811	176.296	-345.851	345.218	3.22934e-06	1	0.998566
[Injured=Intact ]	0a
[Timepoint=1]	2.32427	185.833	-361.901	366.55	0.000156434	1	0.990021
[Timepoint=2]	2943.25	200.722	2549.84	3336.66	215.013	1	0
[Timepoint=3]	2.36702	200.722	-391.042	395.776	0.000139063	1	0.990591
[Timepoint=4]	4.01748	176.296	-341.517	349.552	0.000519303	1	0.981819
[Timepoint=5]	0.783711	176.296	-344.751	346.318	1.97617e-05	1	0.996453
[Timepoint=6]	0a
[Injured=Cut ] * [Timepoint=1]	-0.175096	287.891	-564.431	564.081	3.69912e-07	1	0.999515
[Injured=Cut ] * [Timepoint=2]	-2702.7	267.151	-3226.31	-2179.09	102.348	1	0
[Injured=Cut ] * [Timepoint=3]	-0.104731	260.608	-510.887	510.677	1.61502e-07	1	0.999679
[Injured=Cut ] * [Timepoint=4]	-3.19353	242.296	-478.086	471.698	0.00017372	1	0.989484
[Injured=Cut ] * [Timepoint=5]	0.000254216	242.296	-474.892	474.892	1.10081e-12	1	0.999999
[Injured=Cut ] * [Timepoint=6]	0a
[Injured=Intact ] * [Timepoint=1]	0a
[Injured=Intact ] * [Timepoint=2]	0a
[Injured=Intact ] * [Timepoint=3]	0a
[Injured=Intact ] * [Timepoint=4]	0a
[Injured=Intact ] * [Timepoint=5]	0a
[Injured=Intact ] * [Timepoint=6]	0a
[Temperature=Control ] * [Timepoint=1]	-231.082	262.807	-746.174	284.011	0.773137	1	0.379248
[Temperature=Control ] * [Timepoint=2]	-3171.82	273.538	-3707.94	-2635.69	134.456	1	0
[Temperature=Control ] * [Timepoint=3]	-226.401	267.151	-750.008	297.206	0.718192	1	0.396738
[Temperature=Control ] * [Timepoint=4]	-232.067	256.153	-734.117	269.983	0.820785	1	0.364951
[Temperature=Control ] * [Timepoint=5]	-229.552	249.321	-718.212	259.108	0.847704	1	0.357203
[Temperature=Control ] * [Timepoint=6]	0a
[Temperature=Heated ] * [Timepoint=1]	0a
[Temperature=Heated ] * [Timepoint=2]	0a
[Temperature=Heated ] * [Timepoint=3]	0a
[Temperature=Heated ] * [Timepoint=4]	0a
[Temperature=Heated ] * [Timepoint=5]	0a
[Temperature=Heated ] * [Timepoint=6]	0a
[Temperature=Control ] * [Injured=Cut ] * [Timepoint=1]	0.503425	303.464	-594.274	595.281	2.75205e-06	1	0.998676
[Temperature=Control ] * [Injured=Cut ] * [Timepoint=2]	2703.49	273.538	2167.37	3239.62	97.6819	1	0
[Temperature=Control ] * [Injured=Cut ] * [Timepoint=3]	0.759473	253.896	-496.867	498.386	8.94774e-06	1	0.997613
[Temperature=Control ] * [Injured=Cut ] * [Timepoint=4]	3.2526	249.321	-485.407	491.912	0.000170194	1	0.989591
[Temperature=Control ] * [Injured=Cut ] * [Timepoint=5]	0.325174	235.062	-460.388	461.038	1.91367e-06	1	0.998896
[Temperature=Control ] * [Injured=Cut ] * [Timepoint=6]	-132.55	267.151	-656.157	391.057	0.246175	1	0.619782
[Temperature=Control ] * [Injured=Intact ] * [Timepoint=1]	0a
[Temperature=Control ] * [Injured=Intact ] * [Timepoint=2]	0a
[Temperature=Control ] * [Injured=Intact ] * [Timepoint=3]	0a
[Temperature=Control ] * [Injured=Intact ] * [Timepoint=4]	0a
[Temperature=Control ] * [Injured=Intact ] * [Timepoint=5]	0a
[Temperature=Control ] * [Injured=Intact ] * [Timepoint=6]	0a
[Temperature=Heated ] * [Injured=Cut ] * [Timepoint=1]	0a
[Temperature=Heated ] * [Injured=Cut ] * [Timepoint=2]	0a
[Temperature=Heated ] * [Injured=Cut ] * [Timepoint=3]	0a
[Temperature=Heated ] * [Injured=Cut ] * [Timepoint=4]	0a
[Temperature=Heated ] * [Injured=Cut ] * [Timepoint=5]	0a
[Temperature=Heated ] * [Injured=Cut ] * [Timepoint=6]	0a
[Temperature=Heated ] * [Injured=Intact ] * [Timepoint=1]	0a
[Temperature=Heated ] * [Injured=Intact ] * [Timepoint=2]	0a
[Temperature=Heated ] * [Injured=Intact ] * [Timepoint=3]	0a
[Temperature=Heated ] * [Injured=Intact ] * [Timepoint=4]	0a
[Temperature=Heated ] * [Injured=Intact ] * [Timepoint=5]	0a
[Temperature=Heated ] * [Injured=Intact ] * [Timepoint=6]	0a
(Scale)	69067.628b	9767.64	52347.6	91128.2
Dependent Variable: Catalase Model: (Intercept), Temperature, Injured, Timepoint, Injured * Timepoint, Temperature * Timepoint, Temperature * Injured * Timepoint
a. Set to zero because this parameter is redundant.
b. Maximum likelihood estimate.
Estimated Marginal Means 1: Grand Mean
Estimates
Mean	Std. Error	95% Wald Confidence Interval
		Lower	Upper
147.6	27.0083	94.6646	200.535
Estimated Marginal Means 2: Temperature
Estimates
Temperature	Mean	Std. Error	95% Wald Confidence Interval
			Lower	Upper
Control	28.0519	37.7216	-45.8811	101.985
Heated	267.148	38.6635	191.369	342.927
Pairwise Comparisons
(I) Temperature		Mean Difference (I-J)	Std. Error	df	Sequential Bonferroni Sig.	95% Wald Confidence Interval for Differenceb
						Lower	Upper
Control	Heated	-239.09583a	54.0165	1	9.58436e-06	-344.966	-133.225
Heated	Control	239.09583a	54.0165	1	9.58436e-06	133.225	344.966
Pairwise comparisons of estimated marginal means based on the original scale of dependent variable Catalase
a. The mean difference is significant at the .05 level.
b. Confidence interval bounds are approximate.
Overall Test Results
Wald Chi-Square	df	Sig.
19.5925	1	9.58436e-06
The Wald chi-square tests the effect of Temperature. This test is based on the linearly independent pairwise comparisons among the estimated marginal means.
Estimated Marginal Means 3: Injured
Estimates
Injured	Mean	Std. Error	95% Wald Confidence Interval
			Lower	Upper
Cut	29.2512	38.6635	-46.5278	105.03
Intact	265.948	37.7216	192.015	339.881
Pairwise Comparisons
(I) Injured		Mean Difference (I-J)	Std. Error	df	Sequential Bonferroni Sig.	95% Wald Confidence Interval for Differenceb
						Lower	Upper
Cut	Intact	-236.69718a	54.0165	1	1.17628e-05	-342.568	-130.827
Intact	Cut	236.69718a	54.0165	1	1.17628e-05	130.827	342.568
Pairwise comparisons of estimated marginal means based on the original scale of dependent variable Catalase
a. The mean difference is significant at the .05 level.
b. Confidence interval bounds are approximate.
Overall Test Results
Wald Chi-Square	df	Sig.
19.2014	1	1.17628e-05
The Wald chi-square tests the effect of Injured. This test is based on the linearly independent pairwise comparisons among the estimated marginal means.
Estimated Marginal Means 4: Timepoint
Estimates
Timepoint	Mean	Std. Error	95% Wald Confidence Interval
			Lower	Upper
1	1.3972	75.8659	-147.297	150.092
2	796.444	68.3846	662.412	930.475
3	3.87958	63.474	-120.527	128.286
4	1.77573	62.3302	-120.389	123.941
5	0.664696	58.7655	-114.514	115.843
6	81.438	66.7879	-49.4638	212.34
Pairwise Comparisons
(I) Timepoint		Mean Difference (I-J)	Std. Error	df	Sequential Bonferroni Sig.	95% Wald Confidence Interval for Differenceb
						Lower	Upper
1	2	-795.04653a	102.138	1	8.39329e-14	-1087.7	-502.396
	3	-2.48238	98.917	1	1	-197.211	192.246
	4	-0.378529	98.187	1	1	-192.951	192.194
	5	0.732503	95.9636	1	1	-187.603	189.068
	6	-80.0408	101.075	1	1	-312.563	152.481
2	1	795.04653a	102.138	1	8.39329e-14	502.396	1087.7
	3	792.56414a	93.3027	1	0	518.702	1066.43
	4	794.66800a	92.5284	1	0	525.066	1064.27
	5	795.77903a	90.1656	1	0	535.154	1056.4
	6	715.00574a	95.588	1	8.17013e-13	443.765	986.246
3	1	2.48238	98.917	1	1	-192.246	197.211
	2	-792.56414a	93.3027	1	0	-1066.43	-518.702
	4	2.10385	88.9607	1	1	-172.98	177.187
	5	3.21489	86.5004	1	1	-167.434	173.864
	6	-77.5584	92.1388	1	1	-291.912	136.795
4	1	0.378529	98.187	1	1	-192.194	192.951
	2	-794.66800a	92.5284	1	0	-1064.27	-525.066
	3	-2.10385	88.9607	1	1	-177.187	172.98
	5	1.11103	85.6647	1	1	-167.169	169.392
	6	-79.6623	91.3546	1	1	-293.651	134.327
5	1	-0.732503	95.9636	1	1	-189.068	187.603
	2	-795.77903a	90.1656	1	0	-1056.4	-535.154
	3	-3.21489	86.5004	1	1	-173.864	167.434
	4	-1.11103	85.6647	1	1	-169.392	167.169
	6	-80.7733	88.9607	1	1	-330.489	168.942
6	1	80.0408	101.075	1	1	-152.481	312.563
	2	-715.00574a	95.588	1	8.17013e-13	-986.246	-443.765
	3	77.5584	92.1388	1	1	-136.795	291.912
	4	79.6623	91.3546	1	1	-134.327	293.651
	5	80.7733	88.9607	1	1	-168.942	330.489
Pairwise comparisons of estimated marginal means based on the original scale of dependent variable Catalase
a. The mean difference is significant at the .05 level.
b. Confidence interval bounds are approximate.
Overall Test Results
Wald Chi-Square	df	Sig.
111.361	5	0
The Wald chi-square tests the effect of Timepoint. This test is based on the linearly independent pairwise comparisons among the estimated marginal means.
Estimated Marginal Means 5: Injured* Timepoint
Estimates
Injured		Mean	Std. Error	95% Wald Confidence Interval
				Lower	Upper
Cut	1	1.2771	119.955	-233.829	236.384
	2	120.808	92.9164	-61.3047	302.921
	3	3.85868	83.1069	-159.028	166.745
	4	0.833706	88.1482	-171.934	173.601
	5	0.587711	83.1069	-162.299	163.474
	6	48.1421	95.9636	-139.943	236.227
Intact	1	1.5173	92.9164	-180.595	183.63
	2	1472.08	100.361	1275.38	1668.78
	3	3.90049	95.9636	-184.185	191.986
	4	2.71775	88.1482	-170.05	175.485
	5	0.741681	83.1069	-162.145	163.628
	6	114.734	92.9164	-67.3789	296.847
Pairwise Comparisons
(I) Injured*Timepoint		Mean Difference (I-J)	Std. Error	df	Sequential Bonferroni Sig.	95% Wald Confidence Interval for Differencea
						Lower	Upper
[Injured=Cut]*[Timepoint=1]	[Injured=Cut]*[Timepoint=2]	-119.531	151.732	1	1	-468.265	229.203
	[Injured=Cut]*[Timepoint=3]	-2.58158	145.931	1	1	-289.487	284.324
	[Injured=Cut]*[Timepoint=4]	0.443395	148.86	1	1	-291.468	292.354
	[Injured=Cut]*[Timepoint=5]	0.689391	145.931	1	1	-285.566	286.945
	[Injured=Cut]*[Timepoint=6]	-46.865	153.617	1	1	-365.572	271.842
	[Injured=Intact]*[Timepoint=1]	-0.240195	151.732	1	1	-297.711	297.231
	[Injured=Intact]*[Timepoint=2]	-1470.80228b	156.402	1	0	-1997.54	-944.066
	[Injured=Intact]*[Timepoint=3]	-2.62338	153.617	1	1	-304.607	299.36
	[Injured=Intact]*[Timepoint=4]	-1.44065	148.86	1	1	-293.693	290.812
	[Injured=Intact]*[Timepoint=5]	0.535421	145.931	1	1	-285.667	286.738
	[Injured=Intact]*[Timepoint=6]	-113.457	151.732	1	1	-459.091	232.178
[Injured=Cut]*[Timepoint=2]	[Injured=Cut]*[Timepoint=1]	119.531	151.732	1	1	-229.203	468.265
	[Injured=Cut]*[Timepoint=3]	116.949	124.66	1	1	-179.489	413.387
	[Injured=Cut]*[Timepoint=4]	119.974	128.076	1	1	-184.489	424.438
	[Injured=Cut]*[Timepoint=5]	120.22	124.66	1	1	-293.309	533.75
	[Injured=Cut]*[Timepoint=6]	72.666	133.576	1	1	-218.413	363.745
	[Injured=Intact]*[Timepoint=1]	119.291	131.404	1	1	-191.026	429.607
	[Injured=Intact]*[Timepoint=2]	-1351.27131b	136.769	1	0	-1811.31	-891.23
	[Injured=Intact]*[Timepoint=3]	116.908	133.576	1	1	-196.208	430.023
	[Injured=Intact]*[Timepoint=4]	118.09	128.076	1	1	-185.351	421.531
	[Injured=Intact]*[Timepoint=5]	120.066	124.66	1	1	-178.075	418.208
	[Injured=Intact]*[Timepoint=6]	6.07422	131.404	1	1	-253.577	265.726
[Injured=Cut]*[Timepoint=3]	[Injured=Cut]*[Timepoint=1]	2.58158	145.931	1	1	-284.324	289.487
	[Injured=Cut]*[Timepoint=2]	-116.949	124.66	1	1	-413.387	179.489
	[Injured=Cut]*[Timepoint=4]	3.02497	121.148	1	1	-235.462	241.512
	[Injured=Cut]*[Timepoint=5]	3.27097	117.531	1	1	-228.212	234.754
	[Injured=Cut]*[Timepoint=6]	-44.2834	126.948	1	1	-309.969	221.402
	[Injured=Intact]*[Timepoint=1]	2.34138	124.66	1	1	-242.793	247.475
	[Injured=Intact]*[Timepoint=2]	-1468.22070b	130.304	1	0	-1905.96	-1030.48
	[Injured=Intact]*[Timepoint=3]	-0.0418063	126.948	1	1	-248.869	248.786
	[Injured=Intact]*[Timepoint=4]	1.14093	121.148	1	1	-236.696	238.978
	[Injured=Intact]*[Timepoint=5]	3.117	117.531	1	1	-228.313	234.547
	[Injured=Intact]*[Timepoint=6]	-110.875	124.66	1	1	-404.036	182.286
[Injured=Cut]*[Timepoint=4]	[Injured=Cut]*[Timepoint=1]	-0.443395	148.86	1	1	-292.354	291.468
	[Injured=Cut]*[Timepoint=2]	-119.974	128.076	1	1	-424.438	184.489
	[Injured=Cut]*[Timepoint=3]	-3.02497	121.148	1	1	-241.512	235.462
	[Injured=Cut]*[Timepoint=5]	0.245996	121.148	1	1	-237.284	237.776
	[Injured=Cut]*[Timepoint=6]	-47.3084	130.304	1	1	-320.8	226.183
	[Injured=Intact]*[Timepoint=1]	-0.683591	128.076	1	1	-251.942	250.575
	[Injured=Intact]*[Timepoint=2]	-1471.24567b	133.576	1	0	-1919.39	-1023.1
	[Injured=Intact]*[Timepoint=3]	-3.06678	130.304	1	1	-259.513	253.379
	[Injured=Intact]*[Timepoint=4]	-1.88404	124.66	1	1	-246.86	243.092
	[Injured=Intact]*[Timepoint=5]	0.0920252	121.148	1	1	-237.385	237.569
	[Injured=Intact]*[Timepoint=6]	-113.9	128.076	1	1	-415.088	187.287
[Injured=Cut]*[Timepoint=5]	[Injured=Cut]*[Timepoint=1]	-0.689391	145.931	1	1	-286.945	285.566
	[Injured=Cut]*[Timepoint=2]	-120.22	124.66	1	1	-533.75	293.309
	[Injured=Cut]*[Timepoint=3]	-3.27097	117.531	1	1	-234.754	228.212
	[Injured=Cut]*[Timepoint=4]	-0.245996	121.148	1	1	-237.776	237.284
	[Injured=Cut]*[Timepoint=6]	-47.5544	126.948	1	1	-314.624	219.516
	[Injured=Intact]*[Timepoint=1]	-0.929586	124.66	1	1	-245.578	243.718
	[Injured=Intact]*[Timepoint=2]	-1471.49167b	130.304	1	0	-1908.08	-1034.9
	[Injured=Intact]*[Timepoint=3]	-3.31277	126.948	1	1	-253.267	246.641
	[Injured=Intact]*[Timepoint=4]	-2.13004	121.148	1	1	-240.307	236.047
	[Injured=Intact]*[Timepoint=5]	-0.15397	117.531	1	1	-230.563	230.255
	[Injured=Intact]*[Timepoint=6]	-114.146	124.66	1	1	-409.065	180.772
[Injured=Cut]*[Timepoint=6]	[Injured=Cut]*[Timepoint=1]	46.865	153.617	1	1	-271.842	365.572
	[Injured=Cut]*[Timepoint=2]	-72.666	133.576	1	1	-363.745	218.413
	[Injured=Cut]*[Timepoint=3]	44.2834	126.948	1	1	-221.402	309.969
	[Injured=Cut]*[Timepoint=4]	47.3084	130.304	1	1	-226.183	320.8
	[Injured=Cut]*[Timepoint=5]	47.5544	126.948	1	1	-219.516	314.624
	[Injured=Intact]*[Timepoint=1]	46.6248	133.576	1	1	-232.944	326.194
	[Injured=Intact]*[Timepoint=2]	-1423.93727b	138.857	1	0	-1888.56	-959.311
	[Injured=Intact]*[Timepoint=3]	44.2416	135.713	1	1	-238.493	326.976
	[Injured=Intact]*[Timepoint=4]	45.4244	130.304	1	1	-227.272	318.121
	[Injured=Intact]*[Timepoint=5]	47.4004	126.948	1	1	-219.604	314.405
	[Injured=Intact]*[Timepoint=6]	-66.5917	133.576	1	1	-354.887	221.703
[Injured=Intact]*[Timepoint=1]	[Injured=Cut]*[Timepoint=1]	0.240195	151.732	1	1	-297.231	297.711
	[Injured=Cut]*[Timepoint=2]	-119.291	131.404	1	1	-429.607	191.026
	[Injured=Cut]*[Timepoint=3]	-2.34138	124.66	1	1	-247.475	242.793
	[Injured=Cut]*[Timepoint=4]	0.683591	128.076	1	1	-250.575	251.942
	[Injured=Cut]*[Timepoint=5]	0.929586	124.66	1	1	-243.718	245.578
	[Injured=Cut]*[Timepoint=6]	-46.6248	133.576	1	1	-326.194	232.944
	[Injured=Intact]*[Timepoint=2]	-1470.56208b	136.769	1	0	-1927.57	-1013.55
	[Injured=Intact]*[Timepoint=3]	-2.38319	133.576	1	1	-265.005	260.239
	[Injured=Intact]*[Timepoint=4]	-1.20045	128.076	1	1	-252.637	250.236
	[Injured=Intact]*[Timepoint=5]	0.775616	124.66	1	1	-243.82	245.371
	[Injured=Intact]*[Timepoint=6]	-113.217	131.404	1	1	-420.291	193.858
[Injured=Intact]*[Timepoint=2]	[Injured=Cut]*[Timepoint=1]	1470.80228b	156.402	1	0	944.066	1997.54
	[Injured=Cut]*[Timepoint=2]	1351.27131b	136.769	1	0	891.23	1811.31
	[Injured=Cut]*[Timepoint=3]	1468.22070b	130.304	1	0	1030.48	1905.96
	[Injured=Cut]*[Timepoint=4]	1471.24567b	133.576	1	0	1023.1	1919.39
	[Injured=Cut]*[Timepoint=5]	1471.49167b	130.304	1	0	1034.9	1908.08
	[Injured=Cut]*[Timepoint=6]	1423.93727b	138.857	1	0	959.311	1888.56
	[Injured=Intact]*[Timepoint=1]	1470.56208b	136.769	1	0	1013.55	1927.57
	[Injured=Intact]*[Timepoint=3]	1468.17890b	138.857	1	0	1004.84	1931.52
	[Injured=Intact]*[Timepoint=4]	1469.36163b	133.576	1	0	1024.28	1914.44
	[Injured=Intact]*[Timepoint=5]	1471.33770b	130.304	1	0	1037.79	1904.89
	[Injured=Intact]*[Timepoint=6]	1357.34554b	136.769	1	0	902.96	1811.73
[Injured=Intact]*[Timepoint=3]	[Injured=Cut]*[Timepoint=1]	2.62338	153.617	1	1	-299.36	304.607
	[Injured=Cut]*[Timepoint=2]	-116.908	133.576	1	1	-430.023	196.208
	[Injured=Cut]*[Timepoint=3]	0.0418063	126.948	1	1	-248.786	248.869
	[Injured=Cut]*[Timepoint=4]	3.06678	130.304	1	1	-253.379	259.513
	[Injured=Cut]*[Timepoint=5]	3.31277	126.948	1	1	-246.641	253.267
	[Injured=Cut]*[Timepoint=6]	-44.2416	135.713	1	1	-326.976	238.493
	[Injured=Intact]*[Timepoint=1]	2.38319	133.576	1	1	-260.239	265.005
	[Injured=Intact]*[Timepoint=2]	-1468.17890b	138.857	1	0	-1931.52	-1004.84
	[Injured=Intact]*[Timepoint=4]	1.18273	130.304	1	1	-254.613	256.979
	[Injured=Intact]*[Timepoint=5]	3.1588	126.948	1	1	-246.742	253.059
	[Injured=Intact]*[Timepoint=6]	-110.833	133.576	1	1	-420.745	199.079
[Injured=Intact]*[Timepoint=4]	[Injured=Cut]*[Timepoint=1]	1.44065	148.86	1	1	-290.812	293.693
	[Injured=Cut]*[Timepoint=2]	-118.09	128.076	1	1	-421.531	185.351
	[Injured=Cut]*[Timepoint=3]	-1.14093	121.148	1	1	-238.978	236.696
	[Injured=Cut]*[Timepoint=4]	1.88404	124.66	1	1	-243.092	246.86
	[Injured=Cut]*[Timepoint=5]	2.13004	121.148	1	1	-236.047	240.307
	[Injured=Cut]*[Timepoint=6]	-45.4244	130.304	1	1	-318.121	227.272
	[Injured=Intact]*[Timepoint=1]	1.20045	128.076	1	1	-250.236	252.637
	[Injured=Intact]*[Timepoint=2]	-1469.36163b	133.576	1	0	-1914.44	-1024.28
	[Injured=Intact]*[Timepoint=3]	-1.18273	130.304	1	1	-256.979	254.613
	[Injured=Intact]*[Timepoint=5]	1.97607	121.148	1	1	-236.148	240.1
	[Injured=Intact]*[Timepoint=6]	-112.016	128.076	1	1	-412.199	188.167
[Injured=Intact]*[Timepoint=5]	[Injured=Cut]*[Timepoint=1]	-0.535421	145.931	1	1	-286.738	285.667
	[Injured=Cut]*[Timepoint=2]	-120.066	124.66	1	1	-418.208	178.075
	[Injured=Cut]*[Timepoint=3]	-3.117	117.531	1	1	-234.547	228.313
	[Injured=Cut]*[Timepoint=4]	-0.0920252	121.148	1	1	-237.569	237.385
	[Injured=Cut]*[Timepoint=5]	0.15397	117.531	1	1	-230.255	230.563
	[Injured=Cut]*[Timepoint=6]	-47.4004	126.948	1	1	-314.405	219.604
	[Injured=Intact]*[Timepoint=1]	-0.775616	124.66	1	1	-245.371	243.82
	[Injured=Intact]*[Timepoint=2]	-1471.33770b	130.304	1	0	-1904.89	-1037.79
	[Injured=Intact]*[Timepoint=3]	-3.1588	126.948	1	1	-253.059	246.742
	[Injured=Intact]*[Timepoint=4]	-1.97607	121.148	1	1	-240.1	236.148
	[Injured=Intact]*[Timepoint=6]	-113.992	124.66	1	1	-408.828	180.843
[Injured=Intact]*[Timepoint=6]	[Injured=Cut]*[Timepoint=1]	113.457	151.732	1	1	-232.178	459.091
	[Injured=Cut]*[Timepoint=2]	-6.07422	131.404	1	1	-265.726	253.577
	[Injured=Cut]*[Timepoint=3]	110.875	124.66	1	1	-182.286	404.036
	[Injured=Cut]*[Timepoint=4]	113.9	128.076	1	1	-187.287	415.088
	[Injured=Cut]*[Timepoint=5]	114.146	124.66	1	1	-180.772	409.065
	[Injured=Cut]*[Timepoint=6]	66.5917	133.576	1	1	-221.703	354.887
	[Injured=Intact]*[Timepoint=1]	113.217	131.404	1	1	-193.858	420.291
	[Injured=Intact]*[Timepoint=2]	-1357.34554b	136.769	1	0	-1811.73	-902.96
	[Injured=Intact]*[Timepoint=3]	110.833	133.576	1	1	-199.079	420.745
	[Injured=Intact]*[Timepoint=4]	112.016	128.076	1	1	-188.167	412.199
	[Injured=Intact]*[Timepoint=5]	113.992	124.66	1	1	-180.843	408.828
Pairwise comparisons of estimated marginal means based on the original scale of dependent variable Catalase
a. Confidence interval bounds are approximate.
b. The mean difference is significant at the .05 level.
Overall Test Results
Wald Chi-Square	df	Sig.
195.743	11	0
The Wald chi-square tests the effect of Injured*Timepoint. This test is based on the linearly independent pairwise comparisons among the estimated marginal means.
Estimated Marginal Means 6: Temperature* Timepoint
Estimates
Temperature		Mean	Std. Error	95% Wald Confidence Interval
				Lower	Upper
Control	1	0.0196873	100.361	-196.685	196.724
	2	0.446903	92.9164	-181.666	182.56
	3	4.90653	83.1069	-157.98	167.793
	4	0.592757	92.9164	-181.52	182.706
	5	0.00756768	83.1069	-162.879	162.894
	6	162.338	100.361	-34.3663	359.042
Heated	1	2.77471	113.799	-220.267	225.816
	2	1592.44	100.361	1395.74	1789.14
	3	2.85264	95.9636	-185.233	190.938
	4	2.9587	83.1069	-159.928	165.845
	5	1.32182	83.1069	-161.565	164.208
	6	0.537986	88.1482	-172.229	173.305
Pairwise Comparisons
(I) Temperature*Timepoint		Mean Difference (I-J)	Std. Error	df	Sequential Bonferroni Sig.	95% Wald Confidence Interval for Differencea
						Lower	Upper
[Temperature=Control]*[Timepoint=1]	[Temperature=Control]*[Timepoint=2]	-0.427216	136.769	1	1	-268.636	267.781
	[Temperature=Control]*[Timepoint=3]	-4.88684	130.304	1	1	-261.967	252.193
	[Temperature=Control]*[Timepoint=4]	-0.573069	136.769	1	1	-268.832	267.686
	[Temperature=Control]*[Timepoint=5]	0.0121196	130.304	1	1	-255.383	255.407
	[Temperature=Control]*[Timepoint=6]	-162.318	141.932	1	1	-516.267	191.63
	[Temperature=Heated]*[Timepoint=1]	-2.75502	151.732	1	1	-301.09	295.58
	[Temperature=Heated]*[Timepoint=2]	-1592.42086b	141.932	1	0	-2070.43	-1114.42
	[Temperature=Heated]*[Timepoint=3]	-2.83295	138.857	1	1	-275.962	270.296
	[Temperature=Heated]*[Timepoint=4]	-2.93901	130.304	1	1	-259.341	253.463
	[Temperature=Heated]*[Timepoint=5]	-1.30214	130.304	1	1	-257.139	254.535
	[Temperature=Heated]*[Timepoint=6]	-0.518299	133.576	1	1	-262.499	261.462
[Temperature=Control]*[Timepoint=2]	[Temperature=Control]*[Timepoint=1]	0.427216	136.769	1	1	-267.781	268.636
	[Temperature=Control]*[Timepoint=3]	-4.45963	124.66	1	1	-250.33	241.411
	[Temperature=Control]*[Timepoint=4]	-0.145853	131.404	1	1	-257.742	257.45
	[Temperature=Control]*[Timepoint=5]	0.439336	124.66	1	1	-244.041	244.919
	[Temperature=Control]*[Timepoint=6]	-161.891	136.769	1	1	-506.175	182.393
	[Temperature=Heated]*[Timepoint=1]	-2.32781	146.914	1	1	-291.072	286.416
	[Temperature=Heated]*[Timepoint=2]	-1591.99364b	136.769	1	0	-2052.04	-1131.95
	[Temperature=Heated]*[Timepoint=3]	-2.40573	133.576	1	1	-265.035	260.224
	[Temperature=Heated]*[Timepoint=4]	-2.5118	124.66	1	1	-247.705	242.681
	[Temperature=Heated]*[Timepoint=5]	-0.87492	124.66	1	1	-245.504	243.754
	[Temperature=Heated]*[Timepoint=6]	-0.0910827	128.076	1	1	-251.147	250.965
[Temperature=Control]*[Timepoint=3]	[Temperature=Control]*[Timepoint=1]	4.88684	130.304	1	1	-252.193	261.967
	[Temperature=Control]*[Timepoint=2]	4.45963	124.66	1	1	-241.411	250.33
	[Temperature=Control]*[Timepoint=4]	4.31377	124.66	1	1	-241.505	250.133
	[Temperature=Control]*[Timepoint=5]	4.89896	117.531	1	1	-227.153	236.951
	[Temperature=Control]*[Timepoint=6]	-157.431	130.304	1	1	-487.331	172.468
	[Temperature=Heated]*[Timepoint=1]	2.13182	140.915	1	1	-274.787	279.051
	[Temperature=Heated]*[Timepoint=2]	-1587.53402b	130.304	1	0	-2025.27	-1149.8
	[Temperature=Heated]*[Timepoint=3]	2.05389	126.948	1	1	-247.464	251.572
	[Temperature=Heated]*[Timepoint=4]	1.94783	117.531	1	1	-229.077	232.973
	[Temperature=Heated]*[Timepoint=5]	3.5847	117.531	1	1	-228.008	235.177
	[Temperature=Heated]*[Timepoint=6]	4.36854	121.148	1	1	-234.586	243.323
[Temperature=Control]*[Timepoint=4]	[Temperature=Control]*[Timepoint=1]	0.573069	136.769	1	1	-267.686	268.832
	[Temperature=Control]*[Timepoint=2]	0.145853	131.404	1	1	-257.45	257.742
	[Temperature=Control]*[Timepoint=3]	-4.31377	124.66	1	1	-250.133	241.505
	[Temperature=Control]*[Timepoint=5]	0.585189	124.66	1	1	-243.945	245.115
	[Temperature=Control]*[Timepoint=6]	-161.745	136.769	1	1	-505.944	182.453
	[Temperature=Heated]*[Timepoint=1]	-2.18195	146.914	1	1	-290.876	286.512
	[Temperature=Heated]*[Timepoint=2]	-1591.84779b	136.769	1	0	-2050.71	-1132.99
	[Temperature=Heated]*[Timepoint=3]	-2.25988	133.576	1	1	-264.839	260.319
	[Temperature=Heated]*[Timepoint=4]	-2.36594	124.66	1	1	-247.508	242.777
	[Temperature=Heated]*[Timepoint=5]	-0.729067	124.66	1	1	-245.308	243.85
	[Temperature=Heated]*[Timepoint=6]	0.0547708	128.076	1	1	-250.989	251.099
[Temperature=Control]*[Timepoint=5]	[Temperature=Control]*[Timepoint=1]	-0.0121196	130.304	1	1	-255.407	255.383
	[Temperature=Control]*[Timepoint=2]	-0.439336	124.66	1	1	-244.919	244.041
	[Temperature=Control]*[Timepoint=3]	-4.89896	117.531	1	1	-236.951	227.153
	[Temperature=Control]*[Timepoint=4]	-0.585189	124.66	1	1	-245.115	243.945
	[Temperature=Control]*[Timepoint=6]	-162.33	130.304	1	1	-594.581	269.92
	[Temperature=Heated]*[Timepoint=1]	-2.76714	140.915	1	1	-279.905	274.371
	[Temperature=Heated]*[Timepoint=2]	-1592.43298b	130.304	1	0	-2029.03	-1155.84
	[Temperature=Heated]*[Timepoint=3]	-2.84507	126.948	1	1	-252.637	246.947
	[Temperature=Heated]*[Timepoint=4]	-2.95113	117.531	1	1	-234.323	228.421
	[Temperature=Heated]*[Timepoint=5]	-1.31426	117.531	1	1	-232.121	229.492
	[Temperature=Heated]*[Timepoint=6]	-0.530418	121.148	1	1	-238.158	237.097
[Temperature=Control]*[Timepoint=6]	[Temperature=Control]*[Timepoint=1]	162.318	141.932	1	1	-191.63	516.267
	[Temperature=Control]*[Timepoint=2]	161.891	136.769	1	1	-182.393	506.175
	[Temperature=Control]*[Timepoint=3]	157.431	130.304	1	1	-172.468	487.331
	[Temperature=Control]*[Timepoint=4]	161.745	136.769	1	1	-182.453	505.944
	[Temperature=Control]*[Timepoint=5]	162.33	130.304	1	1	-269.92	594.581
	[Temperature=Heated]*[Timepoint=1]	159.563	151.732	1	1	-210.806	529.932
	[Temperature=Heated]*[Timepoint=2]	-1430.10257b	141.932	1	0	-1905.02	-955.189
	[Temperature=Heated]*[Timepoint=3]	159.485	138.857	1	1	-187.194	506.165
	[Temperature=Heated]*[Timepoint=4]	159.379	130.304	1	1	-171.68	490.439
	[Temperature=Heated]*[Timepoint=5]	161.016	130.304	1	1	-171.022	493.054
	[Temperature=Heated]*[Timepoint=6]	161.8	133.576	1	1	-176.63	500.23
[Temperature=Heated]*[Timepoint=1]	[Temperature=Control]*[Timepoint=1]	2.75502	151.732	1	1	-295.58	301.09
	[Temperature=Control]*[Timepoint=2]	2.32781	146.914	1	1	-286.416	291.072
	[Temperature=Control]*[Timepoint=3]	-2.13182	140.915	1	1	-279.051	274.787
	[Temperature=Control]*[Timepoint=4]	2.18195	146.914	1	1	-286.512	290.876
	[Temperature=Control]*[Timepoint=5]	2.76714	140.915	1	1	-274.371	279.905
	[Temperature=Control]*[Timepoint=6]	-159.563	151.732	1	1	-529.932	210.806
	[Temperature=Heated]*[Timepoint=2]	-1589.66583b	151.732	1	0	-2096.67	-1082.66
	[Temperature=Heated]*[Timepoint=3]	-0.0779256	148.86	1	1	-291.864	291.708
	[Temperature=Heated]*[Timepoint=4]	-0.183989	140.915	1	1	-276.434	276.067
	[Temperature=Heated]*[Timepoint=5]	1.45289	140.915	1	1	-275.232	278.138
	[Temperature=Heated]*[Timepoint=6]	2.23672	143.945	1	1	-280.658	285.132
[Temperature=Heated]*[Timepoint=2]	[Temperature=Control]*[Timepoint=1]	1592.42086b	141.932	1	0	1114.42	2070.43
	[Temperature=Control]*[Timepoint=2]	1591.99364b	136.769	1	0	1131.95	2052.04
	[Temperature=Control]*[Timepoint=3]	1587.53402b	130.304	1	0	1149.8	2025.27
	[Temperature=Control]*[Timepoint=4]	1591.84779b	136.769	1	0	1132.99	2050.71
	[Temperature=Control]*[Timepoint=5]	1592.43298b	130.304	1	0	1155.84	2029.03
	[Temperature=Control]*[Timepoint=6]	1430.10257b	141.932	1	0	955.189	1905.02
	[Temperature=Heated]*[Timepoint=1]	1589.66583b	151.732	1	0	1082.66	2096.67
	[Temperature=Heated]*[Timepoint=3]	1589.58791b	138.857	1	0	1126.25	2052.93
	[Temperature=Heated]*[Timepoint=4]	1589.48185b	130.304	1	0	1155.3	2023.66
	[Temperature=Heated]*[Timepoint=5]	1591.11872b	130.304	1	0	1157.57	2024.67
	[Temperature=Heated]*[Timepoint=6]	1591.90256b	133.576	1	0	1148.13	2035.68
[Temperature=Heated]*[Timepoint=3]	[Temperature=Control]*[Timepoint=1]	2.83295	138.857	1	1	-270.296	275.962
	[Temperature=Control]*[Timepoint=2]	2.40573	133.576	1	1	-260.224	265.035
	[Temperature=Control]*[Timepoint=3]	-2.05389	126.948	1	1	-251.572	247.464
	[Temperature=Control]*[Timepoint=4]	2.25988	133.576	1	1	-260.319	264.839
	[Temperature=Control]*[Timepoint=5]	2.84507	126.948	1	1	-246.947	252.637
	[Temperature=Control]*[Timepoint=6]	-159.485	138.857	1	1	-506.165	187.194
	[Temperature=Heated]*[Timepoint=1]	0.0779256	148.86	1	1	-291.708	291.864
	[Temperature=Heated]*[Timepoint=2]	-1589.58791b	138.857	1	0	-2052.93	-1126.25
	[Temperature=Heated]*[Timepoint=4]	-0.106064	126.948	1	1	-248.956	248.744
	[Temperature=Heated]*[Timepoint=5]	1.53081	126.948	1	1	-247.807	250.869
	[Temperature=Heated]*[Timepoint=6]	2.31465	130.304	1	1	-253.871	258.5
[Temperature=Heated]*[Timepoint=4]	[Temperature=Control]*[Timepoint=1]	2.93901	130.304	1	1	-253.463	259.341
	[Temperature=Control]*[Timepoint=2]	2.5118	124.66	1	1	-242.681	247.705
	[Temperature=Control]*[Timepoint=3]	-1.94783	117.531	1	1	-232.973	229.077
	[Temperature=Control]*[Timepoint=4]	2.36594	124.66	1	1	-242.777	247.508
	[Temperature=Control]*[Timepoint=5]	2.95113	117.531	1	1	-228.421	234.323
	[Temperature=Control]*[Timepoint=6]	-159.379	130.304	1	1	-490.439	171.68
	[Temperature=Heated]*[Timepoint=1]	0.183989	140.915	1	1	-276.067	276.434
	[Temperature=Heated]*[Timepoint=2]	-1589.48185b	130.304	1	0	-2023.66	-1155.3
	[Temperature=Heated]*[Timepoint=3]	0.106064	126.948	1	1	-248.744	248.956
	[Temperature=Heated]*[Timepoint=5]	1.63688	117.531	1	1	-229.281	232.555
	[Temperature=Heated]*[Timepoint=6]	2.42071	121.148	1	1	-235.857	240.698
[Temperature=Heated]*[Timepoint=5]	[Temperature=Control]*[Timepoint=1]	1.30214	130.304	1	1	-254.535	257.139
	[Temperature=Control]*[Timepoint=2]	0.87492	124.66	1	1	-243.754	245.504
	[Temperature=Control]*[Timepoint=3]	-3.5847	117.531	1	1	-235.177	228.008
	[Temperature=Control]*[Timepoint=4]	0.729067	124.66	1	1	-243.85	245.308
	[Temperature=Control]*[Timepoint=5]	1.31426	117.531	1	1	-229.492	232.121
	[Temperature=Control]*[Timepoint=6]	-161.016	130.304	1	1	-493.054	171.022
	[Temperature=Heated]*[Timepoint=1]	-1.45289	140.915	1	1	-278.138	275.232
	[Temperature=Heated]*[Timepoint=2]	-1591.11872b	130.304	1	0	-2024.67	-1157.57
	[Temperature=Heated]*[Timepoint=3]	-1.53081	126.948	1	1	-250.869	247.807
	[Temperature=Heated]*[Timepoint=4]	-1.63688	117.531	1	1	-232.555	229.281
	[Temperature=Heated]*[Timepoint=6]	0.783838	121.148	1	1	-236.93	238.498
[Temperature=Heated]*[Timepoint=6]	[Temperature=Control]*[Timepoint=1]	0.518299	133.576	1	1	-261.462	262.499
	[Temperature=Control]*[Timepoint=2]	0.0910827	128.076	1	1	-250.965	251.147
	[Temperature=Control]*[Timepoint=3]	-4.36854	121.148	1	1	-243.323	234.586
	[Temperature=Control]*[Timepoint=4]	-0.0547708	128.076	1	1	-251.099	250.989
	[Temperature=Control]*[Timepoint=5]	0.530418	121.148	1	1	-237.097	238.158
	[Temperature=Control]*[Timepoint=6]	-161.8	133.576	1	1	-500.23	176.63
	[Temperature=Heated]*[Timepoint=1]	-2.23672	143.945	1	1	-285.132	280.658
	[Temperature=Heated]*[Timepoint=2]	-1591.90256b	133.576	1	0	-2035.68	-1148.13
	[Temperature=Heated]*[Timepoint=3]	-2.31465	130.304	1	1	-258.5	253.871
	[Temperature=Heated]*[Timepoint=4]	-2.42071	121.148	1	1	-240.698	235.857
	[Temperature=Heated]*[Timepoint=5]	-0.783838	121.148	1	1	-238.498	236.93
Pairwise comparisons of estimated marginal means based on the original scale of dependent variable Catalase
a. Confidence interval bounds are approximate.
b. The mean difference is significant at the .05 level.
Overall Test Results
Wald Chi-Square	df	Sig.
232.557	11	0
The Wald chi-square tests the effect of Temperature*Timepoint. This test is based on the linearly independent pairwise comparisons among the estimated marginal means.
Estimated Marginal Means 7: Temperature* Injured* Timepoint
Estimates
Temperature			Mean	Std. Error	95% Wald Confidence Interval
					Lower	Upper
Control	Cut	1	0.025446	151.732	-297.363	297.414
		2	0.684564	131.404	-256.862	258.231
		3	5.07549	117.531	-225.281	235.432
		4	0.463885	131.404	-257.082	258.01
		5	0.0118759	117.531	-230.345	230.368
		6	95.9047	151.732	-201.484	393.294
	Intact	1	0.0139286	131.404	-257.532	257.56
		2	0.209242	131.404	-257.337	257.756
		3	4.73756	117.531	-225.619	235.094
		4	0.721628	131.404	-256.825	258.268
		5	0.00325943	117.531	-230.353	230.36
		6	228.771	131.404	-28.775	486.318
Heated	Cut	1	2.52876	185.833	-361.697	366.754
		2	240.932	131.404	-16.6148	498.478
		3	2.64187	117.531	-227.715	232.998
		4	1.20353	117.531	-229.153	231.56
		5	1.16355	117.531	-229.193	231.52
		6	0.37958	117.531	-229.977	230.736
	Intact	1	3.02066	131.404	-254.526	260.567
		2	2943.95	151.732	2646.56	3241.34
		3	3.06341	151.732	-294.325	300.452
		4	4.71387	117.531	-225.643	235.07
		5	1.4801	117.531	-228.876	231.837
		6	0.696392	131.404	-256.85	258.243
Pairwise Comparisons
(I) Temperature*Injured*Timepoint		Mean Difference (I-J)	Std. Error	df	Sequential Bonferroni Sig.	95% Wald Confidence Interval for Differencea
						Lower	Upper
[Temperature=Control]*[Injured=Cut]*[Timepoint=1]	[Temperature=Control]*[Injured=Cut]*[Timepoint=2]	-0.659118	200.722	1	1	-394.293	392.975
	[Temperature=Control]*[Injured=Cut]*[Timepoint=3]	-5.05005	191.927	1	1	-382.959	372.859
	[Temperature=Control]*[Injured=Cut]*[Timepoint=4]	-0.438439	200.722	1	1	-393.997	393.12
	[Temperature=Control]*[Injured=Cut]*[Timepoint=5]	0.01357	191.927	1	1	-376.162	376.189
	[Temperature=Control]*[Injured=Cut]*[Timepoint=6]	-95.8792	214.581	1	1	-554.038	362.28
	[Temperature=Control]*[Injured=Intact]*[Timepoint=1]	0.0115173	200.722	1	1	-393.401	393.424
	[Temperature=Control]*[Injured=Intact]*[Timepoint=2]	-0.183796	200.722	1	1	-393.655	393.287
	[Temperature=Control]*[Injured=Intact]*[Timepoint=3]	-4.71212	191.927	1	1	-382.504	373.08
	[Temperature=Control]*[Injured=Intact]*[Timepoint=4]	-0.696182	200.722	1	1	-394.343	392.95
	[Temperature=Control]*[Injured=Intact]*[Timepoint=5]	0.0221865	191.927	1	1	-376.156	376.2
	[Temperature=Control]*[Injured=Intact]*[Timepoint=6]	-228.746	200.722	1	1	-728.835	271.343
	[Temperature=Heated]*[Injured=Cut]*[Timepoint=1]	-2.50331	239.909	1	1	-473.574	468.567
	[Temperature=Heated]*[Injured=Cut]*[Timepoint=2]	-240.906	200.722	1	1	-748.137	266.325
	[Temperature=Heated]*[Injured=Cut]*[Timepoint=3]	-2.61642	191.927	1	1	-379.684	374.451
	[Temperature=Heated]*[Injured=Cut]*[Timepoint=4]	-1.17808	191.927	1	1	-377.751	375.395
	[Temperature=Heated]*[Injured=Cut]*[Timepoint=5]	-1.1381	191.927	1	1	-377.698	375.422
	[Temperature=Heated]*[Injured=Cut]*[Timepoint=6]	-0.354134	191.927	1	1	-376.646	375.937
	[Temperature=Heated]*[Injured=Intact]*[Timepoint=1]	-2.99522	200.722	1	1	-397.431	391.441
	[Temperature=Heated]*[Injured=Intact]*[Timepoint=2]	-2943.92407b	214.581	1	0	-3747.3	-2140.55
	[Temperature=Heated]*[Injured=Intact]*[Timepoint=3]	-3.03796	214.581	1	1	-424.651	418.575
	[Temperature=Heated]*[Injured=Intact]*[Timepoint=4]	-4.68843	191.927	1	1	-382.472	373.095
	[Temperature=Heated]*[Injured=Intact]*[Timepoint=5]	-1.45466	191.927	1	1	-378.123	375.214
	[Temperature=Heated]*[Injured=Intact]*[Timepoint=6]	-0.670946	200.722	1	1	-394.309	392.967
[Temperature=Control]*[Injured=Cut]*[Timepoint=2]	[Temperature=Control]*[Injured=Cut]*[Timepoint=1]	0.659118	200.722	1	1	-392.975	394.293
	[Temperature=Control]*[Injured=Cut]*[Timepoint=3]	-4.39093	176.296	1	1	-351.437	342.655
	[Temperature=Control]*[Injured=Cut]*[Timepoint=4]	0.220679	185.833	1	1	-364.08	364.522
	[Temperature=Control]*[Injured=Cut]*[Timepoint=5]	0.672688	176.296	1	1	-345.092	346.437
	[Temperature=Control]*[Injured=Cut]*[Timepoint=6]	-95.2201	200.722	1	1	-526.252	335.812
	[Temperature=Control]*[Injured=Intact]*[Timepoint=1]	0.670635	185.833	1	1	-363.784	365.125
	[Temperature=Control]*[Injured=Intact]*[Timepoint=2]	0.475322	185.833	1	1	-363.913	364.863
	[Temperature=Control]*[Injured=Intact]*[Timepoint=3]	-4.053	176.296	1	1	-350.982	342.876
	[Temperature=Control]*[Injured=Intact]*[Timepoint=4]	-0.0370644	185.833	1	1	-364.275	364.201
	[Temperature=Control]*[Injured=Intact]*[Timepoint=5]	0.681305	176.296	1	1	-345.086	346.449
	[Temperature=Control]*[Injured=Intact]*[Timepoint=6]	-228.087	185.833	1	1	-700.698	244.524
	[Temperature=Heated]*[Injured=Cut]*[Timepoint=1]	-1.84419	227.598	1	1	-448.559	444.87
	[Temperature=Heated]*[Injured=Cut]*[Timepoint=2]	-240.247	185.833	1	1	-720.192	239.698
	[Temperature=Heated]*[Injured=Cut]*[Timepoint=3]	-1.9573	176.296	1	1	-348.162	344.248
	[Temperature=Heated]*[Injured=Cut]*[Timepoint=4]	-0.518963	176.296	1	1	-346.231	345.193
	[Temperature=Heated]*[Injured=Cut]*[Timepoint=5]	-0.478981	176.296	1	1	-346.177	345.219
	[Temperature=Heated]*[Injured=Cut]*[Timepoint=6]	0.304984	176.296	1	1	-345.334	345.944
	[Temperature=Heated]*[Injured=Intact]*[Timepoint=1]	-2.3361	185.833	1	1	-367.362	362.69
	[Temperature=Heated]*[Injured=Intact]*[Timepoint=2]	-2943.26495b	200.722	1	0	-3694.57	-2191.96
	[Temperature=Heated]*[Injured=Intact]*[Timepoint=3]	-2.37884	200.722	1	1	-396.602	391.845
	[Temperature=Heated]*[Injured=Intact]*[Timepoint=4]	-4.02931	176.296	1	1	-350.95	342.891
	[Temperature=Heated]*[Injured=Intact]*[Timepoint=5]	-0.795538	176.296	1	1	-346.602	345.011
	[Temperature=Heated]*[Injured=Intact]*[Timepoint=6]	-0.0118275	185.833	1	1	-364.241	364.218
[Temperature=Control]*[Injured=Cut]*[Timepoint=3]	[Temperature=Control]*[Injured=Cut]*[Timepoint=1]	5.05005	191.927	1	1	-372.859	382.959
	[Temperature=Control]*[Injured=Cut]*[Timepoint=2]	4.39093	176.296	1	1	-342.655	351.437
	[Temperature=Control]*[Injured=Cut]*[Timepoint=4]	4.61161	176.296	1	1	-342.511	351.734
	[Temperature=Control]*[Injured=Cut]*[Timepoint=5]	5.06362	166.214	1	1	-322.455	332.583
	[Temperature=Control]*[Injured=Cut]*[Timepoint=6]	-90.8292	191.927	1	1	-502.876	321.218
	[Temperature=Control]*[Injured=Intact]*[Timepoint=1]	5.06156	176.296	1	1	-342.217	352.34
	[Temperature=Control]*[Injured=Intact]*[Timepoint=2]	4.86625	176.296	1	1	-342.345	352.077
	[Temperature=Control]*[Injured=Intact]*[Timepoint=3]	0.33793	166.214	1	1	-325.551	326.227
	[Temperature=Control]*[Injured=Intact]*[Timepoint=4]	4.35386	176.296	1	1	-342.679	351.387
	[Temperature=Control]*[Injured=Intact]*[Timepoint=5]	5.07223	166.214	1	1	-322.45	332.594
	[Temperature=Control]*[Injured=Intact]*[Timepoint=6]	-223.696	176.296	1	1	-676.45	229.059
	[Temperature=Heated]*[Injured=Cut]*[Timepoint=1]	2.54674	219.88	1	1	-429.283	434.377
	[Temperature=Heated]*[Injured=Cut]*[Timepoint=2]	-235.856	176.296	1	1	-696.035	224.323
	[Temperature=Heated]*[Injured=Cut]*[Timepoint=3]	2.43363	166.214	1	1	-324.174	329.041
	[Temperature=Heated]*[Injured=Cut]*[Timepoint=4]	3.87197	166.214	1	1	-323.233	330.977
	[Temperature=Heated]*[Injured=Cut]*[Timepoint=5]	3.91195	166.214	1	1	-323.207	331.031
	[Temperature=Heated]*[Injured=Cut]*[Timepoint=6]	4.69591	166.214	1	1	-322.695	332.087
	[Temperature=Heated]*[Injured=Intact]*[Timepoint=1]	2.05483	176.296	1	1	-344.184	348.294
	[Temperature=Heated]*[Injured=Intact]*[Timepoint=2]	-2938.87402b	191.927	1	0	-3657.09	-2220.66
	[Temperature=Heated]*[Injured=Intact]*[Timepoint=3]	2.01209	191.927	1	1	-374.848	378.872
	[Temperature=Heated]*[Injured=Intact]*[Timepoint=4]	0.36162	166.214	1	1	-325.535	326.258
	[Temperature=Heated]*[Injured=Intact]*[Timepoint=5]	3.59539	166.214	1	1	-323.414	330.605
	[Temperature=Heated]*[Injured=Intact]*[Timepoint=6]	4.3791	176.296	1	1	-342.663	351.421
[Temperature=Control]*[Injured=Cut]*[Timepoint=4]	[Temperature=Control]*[Injured=Cut]*[Timepoint=1]	0.438439	200.722	1	1	-393.12	393.997
	[Temperature=Control]*[Injured=Cut]*[Timepoint=2]	-0.220679	185.833	1	1	-364.522	364.08
	[Temperature=Control]*[Injured=Cut]*[Timepoint=3]	-4.61161	176.296	1	1	-351.734	342.511
	[Temperature=Control]*[Injured=Cut]*[Timepoint=5]	0.452009	176.296	1	1	-345.237	346.141
	[Temperature=Control]*[Injured=Cut]*[Timepoint=6]	-95.4408	200.722	1	1	-526.571	335.69
	[Temperature=Control]*[Injured=Intact]*[Timepoint=1]	0.449956	185.833	1	1	-363.929	364.829
	[Temperature=Control]*[Injured=Intact]*[Timepoint=2]	0.254643	185.833	1	1	-364.058	364.567
	[Temperature=Control]*[Injured=Intact]*[Timepoint=3]	-4.27368	176.296	1	1	-351.279	342.731
	[Temperature=Control]*[Injured=Intact]*[Timepoint=4]	-0.257743	185.833	1	1	-364.571	364.056
	[Temperature=Control]*[Injured=Intact]*[Timepoint=5]	0.460626	176.296	1	1	-345.231	346.153
	[Temperature=Control]*[Injured=Intact]*[Timepoint=6]	-228.307	185.833	1	1	-701.05	244.435
	[Temperature=Heated]*[Injured=Cut]*[Timepoint=1]	-2.06487	227.598	1	1	-448.855	444.725
	[Temperature=Heated]*[Injured=Cut]*[Timepoint=2]	-240.468	185.833	1	1	-720.548	239.612
	[Temperature=Heated]*[Injured=Cut]*[Timepoint=3]	-2.17798	176.296	1	1	-348.459	344.103
	[Temperature=Heated]*[Injured=Cut]*[Timepoint=4]	-0.739642	176.296	1	1	-346.527	345.048
	[Temperature=Heated]*[Injured=Cut]*[Timepoint=5]	-0.69966	176.296	1	1	-346.473	345.074
	[Temperature=Heated]*[Injured=Cut]*[Timepoint=6]	0.0843047	176.296	1	1	-345.479	345.648
	[Temperature=Heated]*[Injured=Intact]*[Timepoint=1]	-2.55678	185.833	1	1	-367.659	362.545
	[Temperature=Heated]*[Injured=Intact]*[Timepoint=2]	-2943.48563b	200.722	1	0	-3694.43	-2192.55
	[Temperature=Heated]*[Injured=Intact]*[Timepoint=3]	-2.59952	200.722	1	1	-396.899	391.7
	[Temperature=Heated]*[Injured=Intact]*[Timepoint=4]	-4.24999	176.296	1	1	-351.247	342.747
	[Temperature=Heated]*[Injured=Intact]*[Timepoint=5]	-1.01622	176.296	1	1	-346.898	344.866
	[Temperature=Heated]*[Injured=Intact]*[Timepoint=6]	-0.232507	185.833	1	1	-364.537	364.072
[Temperature=Control]*[Injured=Cut]*[Timepoint=5]	[Temperature=Control]*[Injured=Cut]*[Timepoint=1]	-0.01357	191.927	1	1	-376.189	376.162
	[Temperature=Control]*[Injured=Cut]*[Timepoint=2]	-0.672688	176.296	1	1	-346.437	345.092
	[Temperature=Control]*[Injured=Cut]*[Timepoint=3]	-5.06362	166.214	1	1	-332.583	322.455
	[Temperature=Control]*[Injured=Cut]*[Timepoint=4]	-0.452009	176.296	1	1	-346.141	345.237
	[Temperature=Control]*[Injured=Cut]*[Timepoint=6]	-95.8928	191.927	1	1	-510.223	318.437
	[Temperature=Control]*[Injured=Intact]*[Timepoint=1]	-0.00205268	176.296	1	1	-345.537	345.533
	[Temperature=Control]*[Injured=Intact]*[Timepoint=2]	-0.197366	176.296	1	1	-345.799	345.405
	[Temperature=Control]*[Injured=Intact]*[Timepoint=3]	-4.72569	166.214	1	1	-332.127	322.676
	[Temperature=Control]*[Injured=Intact]*[Timepoint=4]	-0.709752	176.296	1	1	-346.487	345.067
	[Temperature=Control]*[Injured=Intact]*[Timepoint=5]	0.00861651	166.214	1	1	-325.768	325.785
	[Temperature=Control]*[Injured=Intact]*[Timepoint=6]	-228.759	176.296	1	1	-684.588	227.069
	[Temperature=Heated]*[Injured=Cut]*[Timepoint=1]	-2.51688	219.88	1	1	-434.337	429.303
	[Temperature=Heated]*[Injured=Cut]*[Timepoint=2]	-240.92	176.296	1	1	-704.232	222.392
	[Temperature=Heated]*[Injured=Cut]*[Timepoint=3]	-2.62999	166.214	1	1	-329.306	324.046
	[Temperature=Heated]*[Injured=Cut]*[Timepoint=4]	-1.19165	166.214	1	1	-327.373	324.989
	[Temperature=Heated]*[Injured=Cut]*[Timepoint=5]	-1.15167	166.214	1	1	-327.319	325.016
	[Temperature=Heated]*[Injured=Cut]*[Timepoint=6]	-0.367704	166.214	1	1	-326.266	325.531
	[Temperature=Heated]*[Injured=Intact]*[Timepoint=1]	-3.00879	176.296	1	1	-349.576	343.559
	[Temperature=Heated]*[Injured=Intact]*[Timepoint=2]	-2943.93764b	191.927	1	0	-3661.8	-2226.08
	[Temperature=Heated]*[Injured=Intact]*[Timepoint=3]	-3.05153	191.927	1	1	-380.269	374.166
	[Temperature=Heated]*[Injured=Intact]*[Timepoint=4]	-4.702	166.214	1	1	-332.095	322.691
	[Temperature=Heated]*[Injured=Intact]*[Timepoint=5]	-1.46823	166.214	1	1	-327.744	324.808
	[Temperature=Heated]*[Injured=Intact]*[Timepoint=6]	-0.684516	176.296	1	1	-346.453	345.084
[Temperature=Control]*[Injured=Cut]*[Timepoint=6]	[Temperature=Control]*[Injured=Cut]*[Timepoint=1]	95.8792	214.581	1	1	-362.28	554.038
	[Temperature=Control]*[Injured=Cut]*[Timepoint=2]	95.2201	200.722	1	1	-335.812	526.252
	[Temperature=Control]*[Injured=Cut]*[Timepoint=3]	90.8292	191.927	1	1	-321.218	502.876
	[Temperature=Control]*[Injured=Cut]*[Timepoint=4]	95.4408	200.722	1	1	-335.69	526.571
	[Temperature=Control]*[Injured=Cut]*[Timepoint=5]	95.8928	191.927	1	1	-318.437	510.223
	[Temperature=Control]*[Injured=Intact]*[Timepoint=1]	95.8907	200.722	1	1	-335.442	527.223
	[Temperature=Control]*[Injured=Intact]*[Timepoint=2]	95.6954	200.722	1	1	-335.549	526.94
	[Temperature=Control]*[Injured=Intact]*[Timepoint=3]	91.1671	191.927	1	1	-321.032	503.366
	[Temperature=Control]*[Injured=Intact]*[Timepoint=4]	95.183	200.722	1	1	-335.832	526.198
	[Temperature=Control]*[Injured=Intact]*[Timepoint=5]	95.9014	191.927	1	1	-318.432	510.235
	[Temperature=Control]*[Injured=Intact]*[Timepoint=6]	-132.867	200.722	1	1	-581.533	315.8
	[Temperature=Heated]*[Injured=Cut]*[Timepoint=1]	93.3759	239.909	1	1	-412.839	599.591
	[Temperature=Heated]*[Injured=Cut]*[Timepoint=2]	-145.027	200.722	1	1	-599.709	309.655
	[Temperature=Heated]*[Injured=Cut]*[Timepoint=3]	93.2628	191.927	1	1	-319.878	506.403
	[Temperature=Heated]*[Injured=Cut]*[Timepoint=4]	94.7011	191.927	1	1	-319.089	508.491
	[Temperature=Heated]*[Injured=Cut]*[Timepoint=5]	94.7411	191.927	1	1	-319.067	508.549
	[Temperature=Heated]*[Injured=Cut]*[Timepoint=6]	95.5251	191.927	1	1	-318.638	509.688
	[Temperature=Heated]*[Injured=Intact]*[Timepoint=1]	92.884	200.722	1	1	-337.104	522.872
	[Temperature=Heated]*[Injured=Intact]*[Timepoint=2]	-2848.04487b	214.581	1	0	-3650.44	-2045.65
	[Temperature=Heated]*[Injured=Intact]*[Timepoint=3]	92.8412	214.581	1	1	-363.979	549.662
	[Temperature=Heated]*[Injured=Intact]*[Timepoint=4]	91.1908	191.927	1	1	-321.018	503.4
	[Temperature=Heated]*[Injured=Intact]*[Timepoint=5]	94.4245	191.927	1	1	-319.24	508.09
	[Temperature=Heated]*[Injured=Intact]*[Timepoint=6]	95.2083	200.722	1	1	-335.818	526.235
[Temperature=Control]*[Injured=Intact]*[Timepoint=1]	[Temperature=Control]*[Injured=Cut]*[Timepoint=1]	-0.0115173	200.722	1	1	-393.424	393.401
	[Temperature=Control]*[Injured=Cut]*[Timepoint=2]	-0.670635	185.833	1	1	-365.125	363.784
	[Temperature=Control]*[Injured=Cut]*[Timepoint=3]	-5.06156	176.296	1	1	-352.34	342.217
	[Temperature=Control]*[Injured=Cut]*[Timepoint=4]	-0.449956	185.833	1	1	-364.829	363.929
	[Temperature=Control]*[Injured=Cut]*[Timepoint=5]	0.00205268	176.296	1	1	-345.533	345.537
	[Temperature=Control]*[Injured=Cut]*[Timepoint=6]	-95.8907	200.722	1	1	-527.223	335.442
	[Temperature=Control]*[Injured=Intact]*[Timepoint=2]	-0.195314	185.833	1	1	-364.488	364.097
	[Temperature=Control]*[Injured=Intact]*[Timepoint=3]	-4.72363	176.296	1	1	-351.885	342.438
	[Temperature=Control]*[Injured=Intact]*[Timepoint=4]	-0.7077	185.833	1	1	-365.175	363.76
	[Temperature=Control]*[Injured=Intact]*[Timepoint=5]	0.0106692	176.296	1	1	-345.528	345.549
	[Temperature=Control]*[Injured=Intact]*[Timepoint=6]	-228.757	185.833	1	1	-701.769	244.254
	[Temperature=Heated]*[Injured=Cut]*[Timepoint=1]	-2.51483	227.598	1	1	-449.46	444.43
	[Temperature=Heated]*[Injured=Cut]*[Timepoint=2]	-240.918	185.833	1	1	-721.272	239.436
	[Temperature=Heated]*[Injured=Cut]*[Timepoint=3]	-2.62794	176.296	1	1	-349.064	343.808
	[Temperature=Heated]*[Injured=Cut]*[Timepoint=4]	-1.1896	176.296	1	1	-347.131	344.752
	[Temperature=Heated]*[Injured=Cut]*[Timepoint=5]	-1.14962	176.296	1	1	-347.077	344.778
	[Temperature=Heated]*[Injured=Cut]*[Timepoint=6]	-0.365652	176.296	1	1	-346.025	345.294
	[Temperature=Heated]*[Injured=Intact]*[Timepoint=1]	-3.00674	185.833	1	1	-368.264	362.251
	[Temperature=Heated]*[Injured=Intact]*[Timepoint=2]	-2943.93559b	200.722	1	0	-3694.32	-2193.55
	[Temperature=Heated]*[Injured=Intact]*[Timepoint=3]	-3.04948	200.722	1	1	-397.504	391.405
	[Temperature=Heated]*[Injured=Intact]*[Timepoint=4]	-4.69994	176.296	1	1	-351.853	342.453
	[Temperature=Heated]*[Injured=Intact]*[Timepoint=5]	-1.46617	176.296	1	1	-347.503	344.57
	[Temperature=Heated]*[Injured=Intact]*[Timepoint=6]	-0.682463	185.833	1	1	-365.141	363.776
[Temperature=Control]*[Injured=Intact]*[Timepoint=2]	[Temperature=Control]*[Injured=Cut]*[Timepoint=1]	0.183796	200.722	1	1	-393.287	393.655
	[Temperature=Control]*[Injured=Cut]*[Timepoint=2]	-0.475322	185.833	1	1	-364.863	363.913
	[Temperature=Control]*[Injured=Cut]*[Timepoint=3]	-4.86625	176.296	1	1	-352.077	342.345
	[Temperature=Control]*[Injured=Cut]*[Timepoint=4]	-0.254643	185.833	1	1	-364.567	364.058
	[Temperature=Control]*[Injured=Cut]*[Timepoint=5]	0.197366	176.296	1	1	-345.405	345.799
	[Temperature=Control]*[Injured=Cut]*[Timepoint=6]	-95.6954	200.722	1	1	-526.94	335.549
	[Temperature=Control]*[Injured=Intact]*[Timepoint=1]	0.195314	185.833	1	1	-364.097	364.488
	[Temperature=Control]*[Injured=Intact]*[Timepoint=3]	-4.52832	176.296	1	1	-351.622	342.565
	[Temperature=Control]*[Injured=Intact]*[Timepoint=4]	-0.512386	185.833	1	1	-364.913	363.888
	[Temperature=Control]*[Injured=Intact]*[Timepoint=5]	0.205983	176.296	1	1	-345.399	345.811
	[Temperature=Control]*[Injured=Intact]*[Timepoint=6]	-228.562	185.833	1	1	-701.457	244.333
	[Temperature=Heated]*[Injured=Cut]*[Timepoint=1]	-2.31951	227.598	1	1	-449.197	444.558
	[Temperature=Heated]*[Injured=Cut]*[Timepoint=2]	-240.722	185.833	1	1	-720.957	239.513
	[Temperature=Heated]*[Injured=Cut]*[Timepoint=3]	-2.43262	176.296	1	1	-348.801	343.936
	[Temperature=Heated]*[Injured=Cut]*[Timepoint=4]	-0.994285	176.296	1	1	-346.869	344.88
	[Temperature=Heated]*[Injured=Cut]*[Timepoint=5]	-0.954303	176.296	1	1	-346.815	344.907
	[Temperature=Heated]*[Injured=Cut]*[Timepoint=6]	-0.170338	176.296	1	1	-345.763	345.422
	[Temperature=Heated]*[Injured=Intact]*[Timepoint=1]	-2.81142	185.833	1	1	-368.001	362.378
	[Temperature=Heated]*[Injured=Intact]*[Timepoint=2]	-2943.74027b	200.722	1	0	-3693.94	-2193.54
	[Temperature=Heated]*[Injured=Intact]*[Timepoint=3]	-2.85417	200.722	1	1	-397.241	391.533
	[Temperature=Heated]*[Injured=Intact]*[Timepoint=4]	-4.50463	176.296	1	1	-351.59	342.581
	[Temperature=Heated]*[Injured=Intact]*[Timepoint=5]	-1.27086	176.296	1	1	-347.24	344.699
	[Temperature=Heated]*[Injured=Intact]*[Timepoint=6]	-0.487149	185.833	1	1	-364.879	363.905
[Temperature=Control]*[Injured=Intact]*[Timepoint=3]	[Temperature=Control]*[Injured=Cut]*[Timepoint=1]	4.71212	191.927	1	1	-373.08	382.504
	[Temperature=Control]*[Injured=Cut]*[Timepoint=2]	4.053	176.296	1	1	-342.876	350.982
	[Temperature=Control]*[Injured=Cut]*[Timepoint=3]	-0.33793	166.214	1	1	-326.227	325.551
	[Temperature=Control]*[Injured=Cut]*[Timepoint=4]	4.27368	176.296	1	1	-342.731	351.279
	[Temperature=Control]*[Injured=Cut]*[Timepoint=5]	4.72569	166.214	1	1	-322.676	332.127
	[Temperature=Control]*[Injured=Cut]*[Timepoint=6]	-91.1671	191.927	1	1	-503.366	321.032
	[Temperature=Control]*[Injured=Intact]*[Timepoint=1]	4.72363	176.296	1	1	-342.438	351.885
	[Temperature=Control]*[Injured=Intact]*[Timepoint=2]	4.52832	176.296	1	1	-342.565	351.622
	[Temperature=Control]*[Injured=Intact]*[Timepoint=4]	4.01593	176.296	1	1	-342.9	350.932
	[Temperature=Control]*[Injured=Intact]*[Timepoint=5]	4.7343	166.214	1	1	-322.67	332.139
	[Temperature=Control]*[Injured=Intact]*[Timepoint=6]	-224.034	176.296	1	1	-676.992	228.925
	[Temperature=Heated]*[Injured=Cut]*[Timepoint=1]	2.20881	219.88	1	1	-429.505	433.923
	[Temperature=Heated]*[Injured=Cut]*[Timepoint=2]	-236.194	176.296	1	1	-696.581	224.193
	[Temperature=Heated]*[Injured=Cut]*[Timepoint=3]	2.0957	166.214	1	1	-324.396	328.587
	[Temperature=Heated]*[Injured=Cut]*[Timepoint=4]	3.53404	166.214	1	1	-323.454	330.522
	[Temperature=Heated]*[Injured=Cut]*[Timepoint=5]	3.57402	166.214	1	1	-323.428	330.576
	[Temperature=Heated]*[Injured=Cut]*[Timepoint=6]	4.35798	166.214	1	1	-322.916	331.632
	[Temperature=Heated]*[Injured=Intact]*[Timepoint=1]	1.7169	176.296	1	1	-344.406	347.839
	[Temperature=Heated]*[Injured=Intact]*[Timepoint=2]	-2939.21195b	191.927	1	0	-3656.36	-2222.07
	[Temperature=Heated]*[Injured=Intact]*[Timepoint=3]	1.67416	191.927	1	1	-375.069	378.418
	[Temperature=Heated]*[Injured=Intact]*[Timepoint=4]	0.02369	166.214	1	1	-325.758	325.805
	[Temperature=Heated]*[Injured=Intact]*[Timepoint=5]	3.25746	166.214	1	1	-323.635	330.15
	[Temperature=Heated]*[Injured=Intact]*[Timepoint=6]	4.04117	176.296	1	1	-342.883	350.966
[Temperature=Control]*[Injured=Intact]*[Timepoint=4]	[Temperature=Control]*[Injured=Cut]*[Timepoint=1]	0.696182	200.722	1	1	-392.95	394.343
	[Temperature=Control]*[Injured=Cut]*[Timepoint=2]	0.0370644	185.833	1	1	-364.201	364.275
	[Temperature=Control]*[Injured=Cut]*[Timepoint=3]	-4.35386	176.296	1	1	-351.387	342.679
	[Temperature=Control]*[Injured=Cut]*[Timepoint=4]	0.257743	185.833	1	1	-364.056	364.571
	[Temperature=Control]*[Injured=Cut]*[Timepoint=5]	0.709752	176.296	1	1	-345.067	346.487
	[Temperature=Control]*[Injured=Cut]*[Timepoint=6]	-95.183	200.722	1	1	-526.198	335.832
	[Temperature=Control]*[Injured=Intact]*[Timepoint=1]	0.7077	185.833	1	1	-363.76	365.175
	[Temperature=Control]*[Injured=Intact]*[Timepoint=2]	0.512386	185.833	1	1	-363.888	364.913
	[Temperature=Control]*[Injured=Intact]*[Timepoint=3]	-4.01593	176.296	1	1	-350.932	342.9
	[Temperature=Control]*[Injured=Intact]*[Timepoint=5]	0.718369	176.296	1	1	-345.062	346.499
	[Temperature=Control]*[Injured=Intact]*[Timepoint=6]	-228.05	185.833	1	1	-700.638	244.539
	[Temperature=Heated]*[Injured=Cut]*[Timepoint=1]	-1.80713	227.598	1	1	-448.509	444.895
	[Temperature=Heated]*[Injured=Cut]*[Timepoint=2]	-240.21	185.833	1	1	-720.133	239.713
	[Temperature=Heated]*[Injured=Cut]*[Timepoint=3]	-1.92024	176.296	1	1	-348.113	344.272
	[Temperature=Heated]*[Injured=Cut]*[Timepoint=4]	-0.481899	176.296	1	1	-346.181	345.217
	[Temperature=Heated]*[Injured=Cut]*[Timepoint=5]	-0.441917	176.296	1	1	-346.128	345.244
	[Temperature=Heated]*[Injured=Cut]*[Timepoint=6]	0.342048	176.296	1	1	-345.309	345.994
	[Temperature=Heated]*[Injured=Intact]*[Timepoint=1]	-2.29904	185.833	1	1	-367.312	362.714
	[Temperature=Heated]*[Injured=Intact]*[Timepoint=2]	-2943.22789b	200.722	1	0	-3693.05	-2193.41
	[Temperature=Heated]*[Injured=Intact]*[Timepoint=3]	-2.34178	200.722	1	1	-396.553	391.869
	[Temperature=Heated]*[Injured=Intact]*[Timepoint=4]	-3.99224	176.296	1	1	-350.9	342.915
	[Temperature=Heated]*[Injured=Intact]*[Timepoint=5]	-0.758474	176.296	1	1	-346.552	345.035
	[Temperature=Heated]*[Injured=Intact]*[Timepoint=6]	0.0252369	185.833	1	1	-364.209	364.259
[Temperature=Control]*[Injured=Intact]*[Timepoint=5]	[Temperature=Control]*[Injured=Cut]*[Timepoint=1]	-0.0221865	191.927	1	1	-376.2	376.156
	[Temperature=Control]*[Injured=Cut]*[Timepoint=2]	-0.681305	176.296	1	1	-346.449	345.086
	[Temperature=Control]*[Injured=Cut]*[Timepoint=3]	-5.07223	166.214	1	1	-332.594	322.45
	[Temperature=Control]*[Injured=Cut]*[Timepoint=4]	-0.460626	176.296	1	1	-346.153	345.231
	[Temperature=Control]*[Injured=Cut]*[Timepoint=5]	-0.00861651	166.214	1	1	-325.785	325.768
	[Temperature=Control]*[Injured=Cut]*[Timepoint=6]	-95.9014	191.927	1	1	-510.235	318.432
	[Temperature=Control]*[Injured=Intact]*[Timepoint=1]	-0.0106692	176.296	1	1	-345.549	345.528
	[Temperature=Control]*[Injured=Intact]*[Timepoint=2]	-0.205983	176.296	1	1	-345.811	345.399
	[Temperature=Control]*[Injured=Intact]*[Timepoint=3]	-4.7343	166.214	1	1	-332.139	322.67
	[Temperature=Control]*[Injured=Intact]*[Timepoint=4]	-0.718369	176.296	1	1	-346.499	345.062
	[Temperature=Control]*[Injured=Intact]*[Timepoint=6]	-228.768	176.296	1	1	-684.602	227.066
	[Temperature=Heated]*[Injured=Cut]*[Timepoint=1]	-2.5255	219.88	1	1	-434.348	429.297
	[Temperature=Heated]*[Injured=Cut]*[Timepoint=2]	-240.928	176.296	1	1	-897.109	415.252
	[Temperature=Heated]*[Injured=Cut]*[Timepoint=3]	-2.63861	166.214	1	1	-329.317	324.04
	[Temperature=Heated]*[Injured=Cut]*[Timepoint=4]	-1.20027	166.214	1	1	-327.384	324.984
	[Temperature=Heated]*[Injured=Cut]*[Timepoint=5]	-1.16029	166.214	1	1	-327.33	325.01
	[Temperature=Heated]*[Injured=Cut]*[Timepoint=6]	-0.376321	166.214	1	1	-326.278	325.525
	[Temperature=Heated]*[Injured=Intact]*[Timepoint=1]	-3.01741	176.296	1	1	-349.588	343.553
	[Temperature=Heated]*[Injured=Intact]*[Timepoint=2]	-2943.94626b	191.927	1	0	-3660.73	-2227.16
	[Temperature=Heated]*[Injured=Intact]*[Timepoint=3]	-3.06015	191.927	1	1	-380.281	374.16
	[Temperature=Heated]*[Injured=Intact]*[Timepoint=4]	-4.71061	166.214	1	1	-332.107	322.686
	[Temperature=Heated]*[Injured=Intact]*[Timepoint=5]	-1.47684	166.214	1	1	-327.756	324.802
	[Temperature=Heated]*[Injured=Intact]*[Timepoint=6]	-0.693132	176.296	1	1	-346.465	345.078
[Temperature=Control]*[Injured=Intact]*[Timepoint=6]	[Temperature=Control]*[Injured=Cut]*[Timepoint=1]	228.746	200.722	1	1	-271.343	728.835
	[Temperature=Control]*[Injured=Cut]*[Timepoint=2]	228.087	185.833	1	1	-244.524	700.698
	[Temperature=Control]*[Injured=Cut]*[Timepoint=3]	223.696	176.296	1	1	-229.059	676.45
	[Temperature=Control]*[Injured=Cut]*[Timepoint=4]	228.307	185.833	1	1	-244.435	701.05
	[Temperature=Control]*[Injured=Cut]*[Timepoint=5]	228.759	176.296	1	1	-227.069	684.588
	[Temperature=Control]*[Injured=Cut]*[Timepoint=6]	132.867	200.722	1	1	-315.8	581.533
	[Temperature=Control]*[Injured=Intact]*[Timepoint=1]	228.757	185.833	1	1	-244.254	701.769
	[Temperature=Control]*[Injured=Intact]*[Timepoint=2]	228.562	185.833	1	1	-244.333	701.457
	[Temperature=Control]*[Injured=Intact]*[Timepoint=3]	224.034	176.296	1	1	-228.925	676.992
	[Temperature=Control]*[Injured=Intact]*[Timepoint=4]	228.05	185.833	1	1	-244.539	700.638
	[Temperature=Control]*[Injured=Intact]*[Timepoint=5]	228.768	176.296	1	1	-227.066	684.602
	[Temperature=Heated]*[Injured=Cut]*[Timepoint=1]	226.243	227.598	1	1	-321.969	774.454
	[Temperature=Heated]*[Injured=Cut]*[Timepoint=2]	-12.1603	185.833	1	1	-380.627	356.306
	[Temperature=Heated]*[Injured=Cut]*[Timepoint=3]	226.129	176.296	1	1	-228.099	680.358
	[Temperature=Heated]*[Injured=Cut]*[Timepoint=4]	227.568	176.296	1	1	-227.535	682.671
	[Temperature=Heated]*[Injured=Cut]*[Timepoint=5]	227.608	176.296	1	1	-227.519	682.735
	[Temperature=Heated]*[Injured=Cut]*[Timepoint=6]	228.392	176.296	1	1	-227.213	683.996
	[Temperature=Heated]*[Injured=Intact]*[Timepoint=1]	225.751	185.833	1	1	-245.467	696.968
	[Temperature=Heated]*[Injured=Intact]*[Timepoint=2]	-2715.17822b	200.722	1	0	-3464.62	-1965.74
	[Temperature=Heated]*[Injured=Intact]*[Timepoint=3]	225.708	200.722	1	1	-272.618	724.033
	[Temperature=Heated]*[Injured=Intact]*[Timepoint=4]	224.057	176.296	1	1	-228.916	677.03
	[Temperature=Heated]*[Injured=Intact]*[Timepoint=5]	227.291	176.296	1	1	-227.643	682.226
	[Temperature=Heated]*[Injured=Intact]*[Timepoint=6]	228.075	185.833	1	1	-244.529	700.679
[Temperature=Heated]*[Injured=Cut]*[Timepoint=1]	[Temperature=Control]*[Injured=Cut]*[Timepoint=1]	2.50331	239.909	1	1	-468.567	473.574
	[Temperature=Control]*[Injured=Cut]*[Timepoint=2]	1.84419	227.598	1	1	-444.87	448.559
	[Temperature=Control]*[Injured=Cut]*[Timepoint=3]	-2.54674	219.88	1	1	-434.377	429.283
	[Temperature=Control]*[Injured=Cut]*[Timepoint=4]	2.06487	227.598	1	1	-444.725	448.855
	[Temperature=Control]*[Injured=Cut]*[Timepoint=5]	2.51688	219.88	1	1	-429.303	434.337
	[Temperature=Control]*[Injured=Cut]*[Timepoint=6]	-93.3759	239.909	1	1	-599.591	412.839
	[Temperature=Control]*[Injured=Intact]*[Timepoint=1]	2.51483	227.598	1	1	-444.43	449.46
	[Temperature=Control]*[Injured=Intact]*[Timepoint=2]	2.31951	227.598	1	1	-444.558	449.197
	[Temperature=Control]*[Injured=Intact]*[Timepoint=3]	-2.20881	219.88	1	1	-433.923	429.505
	[Temperature=Control]*[Injured=Intact]*[Timepoint=4]	1.80713	227.598	1	1	-444.895	448.509
	[Temperature=Control]*[Injured=Intact]*[Timepoint=5]	2.5255	219.88	1	1	-429.297	434.348
	[Temperature=Control]*[Injured=Intact]*[Timepoint=6]	-226.243	227.598	1	1	-774.454	321.969
	[Temperature=Heated]*[Injured=Cut]*[Timepoint=2]	-238.403	227.598	1	1	-793.424	316.618
	[Temperature=Heated]*[Injured=Cut]*[Timepoint=3]	-0.113108	219.88	1	1	-431.109	430.883
	[Temperature=Heated]*[Injured=Cut]*[Timepoint=4]	1.32523	219.88	1	1	-430.085	432.736
	[Temperature=Heated]*[Injured=Cut]*[Timepoint=5]	1.36521	219.88	1	1	-430.059	432.79
	[Temperature=Heated]*[Injured=Cut]*[Timepoint=6]	2.14918	219.88	1	1	-429.544	433.843
	[Temperature=Heated]*[Injured=Intact]*[Timepoint=1]	-0.491908	227.598	1	1	-446.743	445.759
	[Temperature=Heated]*[Injured=Intact]*[Timepoint=2]	-2941.42076b	239.909	1	0	-3836.94	-2045.9
	[Temperature=Heated]*[Injured=Intact]*[Timepoint=3]	-0.534651	239.909	1	1	-470.93	469.861
	[Temperature=Heated]*[Injured=Intact]*[Timepoint=4]	-2.18512	219.88	1	1	-433.891	429.521
	[Temperature=Heated]*[Injured=Intact]*[Timepoint=5]	1.04865	219.88	1	1	-430.267	432.365
	[Temperature=Heated]*[Injured=Intact]*[Timepoint=6]	1.83237	227.598	1	1	-444.878	448.543
[Temperature=Heated]*[Injured=Cut]*[Timepoint=2]	[Temperature=Control]*[Injured=Cut]*[Timepoint=1]	240.906	200.722	1	1	-266.325	748.137
	[Temperature=Control]*[Injured=Cut]*[Timepoint=2]	240.247	185.833	1	1	-239.698	720.192
	[Temperature=Control]*[Injured=Cut]*[Timepoint=3]	235.856	176.296	1	1	-224.323	696.035
	[Temperature=Control]*[Injured=Cut]*[Timepoint=4]	240.468	185.833	1	1	-239.612	720.548
	[Temperature=Control]*[Injured=Cut]*[Timepoint=5]	240.92	176.296	1	1	-222.392	704.232
	[Temperature=Control]*[Injured=Cut]*[Timepoint=6]	145.027	200.722	1	1	-309.655	599.709
	[Temperature=Control]*[Injured=Intact]*[Timepoint=1]	240.918	185.833	1	1	-239.436	721.272
	[Temperature=Control]*[Injured=Intact]*[Timepoint=2]	240.722	185.833	1	1	-239.513	720.957
	[Temperature=Control]*[Injured=Intact]*[Timepoint=3]	236.194	176.296	1	1	-224.193	696.581
	[Temperature=Control]*[Injured=Intact]*[Timepoint=4]	240.21	185.833	1	1	-239.713	720.133
	[Temperature=Control]*[Injured=Intact]*[Timepoint=5]	240.928	176.296	1	1	-415.252	897.109
	[Temperature=Control]*[Injured=Intact]*[Timepoint=6]	12.1603	185.833	1	1	-356.306	380.627
	[Temperature=Heated]*[Injured=Cut]*[Timepoint=1]	238.403	227.598	1	1	-316.618	793.424
	[Temperature=Heated]*[Injured=Cut]*[Timepoint=3]	238.29	176.296	1	1	-223.392	699.971
	[Temperature=Heated]*[Injured=Cut]*[Timepoint=4]	239.728	176.296	1	1	-222.844	702.3
	[Temperature=Heated]*[Injured=Cut]*[Timepoint=5]	239.768	176.296	1	1	-222.829	702.365
	[Temperature=Heated]*[Injured=Cut]*[Timepoint=6]	240.552	176.296	1	1	-222.532	703.636
	[Temperature=Heated]*[Injured=Intact]*[Timepoint=1]	237.911	185.833	1	1	-240.615	716.437
	[Temperature=Heated]*[Injured=Intact]*[Timepoint=2]	-2703.01795b	200.722	1	0	-3452.07	-1953.96
	[Temperature=Heated]*[Injured=Intact]*[Timepoint=3]	237.868	200.722	1	1	-267.567	743.303
	[Temperature=Heated]*[Injured=Intact]*[Timepoint=4]	236.218	176.296	1	1	-224.184	696.619
	[Temperature=Heated]*[Injured=Intact]*[Timepoint=5]	239.451	176.296	1	1	-222.949	701.852
	[Temperature=Heated]*[Injured=Intact]*[Timepoint=6]	240.235	185.833	1	1	-239.703	720.173
[Temperature=Heated]*[Injured=Cut]*[Timepoint=3]	[Temperature=Control]*[Injured=Cut]*[Timepoint=1]	2.61642	191.927	1	1	-374.451	379.684
	[Temperature=Control]*[Injured=Cut]*[Timepoint=2]	1.9573	176.296	1	1	-344.248	348.162
	[Temperature=Control]*[Injured=Cut]*[Timepoint=3]	-2.43363	166.214	1	1	-329.041	324.174
	[Temperature=Control]*[Injured=Cut]*[Timepoint=4]	2.17798	176.296	1	1	-344.103	348.459
	[Temperature=Control]*[Injured=Cut]*[Timepoint=5]	2.62999	166.214	1	1	-324.046	329.306
	[Temperature=Control]*[Injured=Cut]*[Timepoint=6]	-93.2628	191.927	1	1	-506.403	319.878
	[Temperature=Control]*[Injured=Intact]*[Timepoint=1]	2.62794	176.296	1	1	-343.808	349.064
	[Temperature=Control]*[Injured=Intact]*[Timepoint=2]	2.43262	176.296	1	1	-343.936	348.801
	[Temperature=Control]*[Injured=Intact]*[Timepoint=3]	-2.0957	166.214	1	1	-328.587	324.396
	[Temperature=Control]*[Injured=Intact]*[Timepoint=4]	1.92024	176.296	1	1	-344.272	348.113
	[Temperature=Control]*[Injured=Intact]*[Timepoint=5]	2.63861	166.214	1	1	-324.04	329.317
	[Temperature=Control]*[Injured=Intact]*[Timepoint=6]	-226.129	176.296	1	1	-680.358	228.099
	[Temperature=Heated]*[Injured=Cut]*[Timepoint=1]	0.113108	219.88	1	1	-430.883	431.109
	[Temperature=Heated]*[Injured=Cut]*[Timepoint=2]	-238.29	176.296	1	1	-699.971	223.392
	[Temperature=Heated]*[Injured=Cut]*[Timepoint=4]	1.43834	166.214	1	1	-324.827	327.704
	[Temperature=Heated]*[Injured=Cut]*[Timepoint=5]	1.47832	166.214	1	1	-324.801	327.758
	[Temperature=Heated]*[Injured=Cut]*[Timepoint=6]	2.26228	166.214	1	1	-324.287	328.811
	[Temperature=Heated]*[Injured=Intact]*[Timepoint=1]	-0.3788	176.296	1	1	-346.043	345.285
	[Temperature=Heated]*[Injured=Intact]*[Timepoint=2]	-2941.30765b	191.927	1	0	-3657.36	-2225.26
	[Temperature=Heated]*[Injured=Intact]*[Timepoint=3]	-0.421543	191.927	1	1	-376.736	375.893
	[Temperature=Heated]*[Injured=Intact]*[Timepoint=4]	-2.07201	166.214	1	1	-328.555	324.411
	[Temperature=Heated]*[Injured=Intact]*[Timepoint=5]	1.16176	166.214	1	1	-325.009	327.332
	[Temperature=Heated]*[Injured=Intact]*[Timepoint=6]	1.94547	176.296	1	1	-344.256	348.147
[Temperature=Heated]*[Injured=Cut]*[Timepoint=4]	[Temperature=Control]*[Injured=Cut]*[Timepoint=1]	1.17808	191.927	1	1	-375.395	377.751
	[Temperature=Control]*[Injured=Cut]*[Timepoint=2]	0.518963	176.296	1	1	-345.193	346.231
	[Temperature=Control]*[Injured=Cut]*[Timepoint=3]	-3.87197	166.214	1	1	-330.977	323.233
	[Temperature=Control]*[Injured=Cut]*[Timepoint=4]	0.739642	176.296	1	1	-345.048	346.527
	[Temperature=Control]*[Injured=Cut]*[Timepoint=5]	1.19165	166.214	1	1	-324.989	327.373
	[Temperature=Control]*[Injured=Cut]*[Timepoint=6]	-94.7011	191.927	1	1	-508.491	319.089
	[Temperature=Control]*[Injured=Intact]*[Timepoint=1]	1.1896	176.296	1	1	-344.752	347.131
	[Temperature=Control]*[Injured=Intact]*[Timepoint=2]	0.994285	176.296	1	1	-344.88	346.869
	[Temperature=Control]*[Injured=Intact]*[Timepoint=3]	-3.53404	166.214	1	1	-330.522	323.454
	[Temperature=Control]*[Injured=Intact]*[Timepoint=4]	0.481899	176.296	1	1	-345.217	346.181
	[Temperature=Control]*[Injured=Intact]*[Timepoint=5]	1.20027	166.214	1	1	-324.984	327.384
	[Temperature=Control]*[Injured=Intact]*[Timepoint=6]	-227.568	176.296	1	1	-682.671	227.535
	[Temperature=Heated]*[Injured=Cut]*[Timepoint=1]	-1.32523	219.88	1	1	-432.736	430.085
	[Temperature=Heated]*[Injured=Cut]*[Timepoint=2]	-239.728	176.296	1	1	-702.3	222.844
	[Temperature=Heated]*[Injured=Cut]*[Timepoint=3]	-1.43834	166.214	1	1	-327.704	324.827
	[Temperature=Heated]*[Injured=Cut]*[Timepoint=5]	0.039982	166.214	1	1	-325.747	325.827
	[Temperature=Heated]*[Injured=Cut]*[Timepoint=6]	0.823947	166.214	1	1	-325.231	326.879
	[Temperature=Heated]*[Injured=Intact]*[Timepoint=1]	-1.81714	176.296	1	1	-347.974	344.34
	[Temperature=Heated]*[Injured=Intact]*[Timepoint=2]	-2942.74599b	191.927	1	0	-3658.61	-2226.88
	[Temperature=Heated]*[Injured=Intact]*[Timepoint=3]	-1.85988	191.927	1	1	-378.667	374.947
	[Temperature=Heated]*[Injured=Intact]*[Timepoint=4]	-3.51035	166.214	1	1	-330.49	323.469
	[Temperature=Heated]*[Injured=Intact]*[Timepoint=5]	-0.276575	166.214	1	1	-326.144	325.591
	[Temperature=Heated]*[Injured=Intact]*[Timepoint=6]	0.507136	176.296	1	1	-345.201	346.215
[Temperature=Heated]*[Injured=Cut]*[Timepoint=5]	[Temperature=Control]*[Injured=Cut]*[Timepoint=1]	1.1381	191.927	1	1	-375.422	377.698
	[Temperature=Control]*[Injured=Cut]*[Timepoint=2]	0.478981	176.296	1	1	-345.219	346.177
	[Temperature=Control]*[Injured=Cut]*[Timepoint=3]	-3.91195	166.214	1	1	-331.031	323.207
	[Temperature=Control]*[Injured=Cut]*[Timepoint=4]	0.69966	176.296	1	1	-345.074	346.473
	[Temperature=Control]*[Injured=Cut]*[Timepoint=5]	1.15167	166.214	1	1	-325.016	327.319
	[Temperature=Control]*[Injured=Cut]*[Timepoint=6]	-94.7411	191.927	1	1	-508.549	319.067
	[Temperature=Control]*[Injured=Intact]*[Timepoint=1]	1.14962	176.296	1	1	-344.778	347.077
	[Temperature=Control]*[Injured=Intact]*[Timepoint=2]	0.954303	176.296	1	1	-344.907	346.815
	[Temperature=Control]*[Injured=Intact]*[Timepoint=3]	-3.57402	166.214	1	1	-330.576	323.428
	[Temperature=Control]*[Injured=Intact]*[Timepoint=4]	0.441917	176.296	1	1	-345.244	346.128
	[Temperature=Control]*[Injured=Intact]*[Timepoint=5]	1.16029	166.214	1	1	-325.01	327.33
	[Temperature=Control]*[Injured=Intact]*[Timepoint=6]	-227.608	176.296	1	1	-682.735	227.519
	[Temperature=Heated]*[Injured=Cut]*[Timepoint=1]	-1.36521	219.88	1	1	-432.79	430.059
	[Temperature=Heated]*[Injured=Cut]*[Timepoint=2]	-239.768	176.296	1	1	-702.365	222.829
	[Temperature=Heated]*[Injured=Cut]*[Timepoint=3]	-1.47832	166.214	1	1	-327.758	324.801
	[Temperature=Heated]*[Injured=Cut]*[Timepoint=4]	-0.039982	166.214	1	1	-325.827	325.747
	[Temperature=Heated]*[Injured=Cut]*[Timepoint=6]	0.783965	166.214	1	1	-325.257	326.825
	[Temperature=Heated]*[Injured=Intact]*[Timepoint=1]	-1.85712	176.296	1	1	-348.028	344.314
	[Temperature=Heated]*[Injured=Intact]*[Timepoint=2]	-2942.78597b	191.927	1	0	-3658.47	-2227.11
	[Temperature=Heated]*[Injured=Intact]*[Timepoint=3]	-1.89986	191.927	1	1	-378.721	374.921
	[Temperature=Heated]*[Injured=Intact]*[Timepoint=4]	-3.55033	166.214	1	1	-330.544	323.443
	[Temperature=Heated]*[Injured=Intact]*[Timepoint=5]	-0.316557	166.214	1	1	-326.198	325.565
	[Temperature=Heated]*[Injured=Intact]*[Timepoint=6]	0.467154	176.296	1	1	-345.227	346.161
[Temperature=Heated]*[Injured=Cut]*[Timepoint=6]	[Temperature=Control]*[Injured=Cut]*[Timepoint=1]	0.354134	191.927	1	1	-375.937	376.646
	[Temperature=Control]*[Injured=Cut]*[Timepoint=2]	-0.304984	176.296	1	1	-345.944	345.334
	[Temperature=Control]*[Injured=Cut]*[Timepoint=3]	-4.69591	166.214	1	1	-332.087	322.695
	[Temperature=Control]*[Injured=Cut]*[Timepoint=4]	-0.0843047	176.296	1	1	-345.648	345.479
	[Temperature=Control]*[Injured=Cut]*[Timepoint=5]	0.367704	166.214	1	1	-325.531	326.266
	[Temperature=Control]*[Injured=Cut]*[Timepoint=6]	-95.5251	191.927	1	1	-509.688	318.638
	[Temperature=Control]*[Injured=Intact]*[Timepoint=1]	0.365652	176.296	1	1	-345.294	346.025
	[Temperature=Control]*[Injured=Intact]*[Timepoint=2]	0.170338	176.296	1	1	-345.422	345.763
	[Temperature=Control]*[Injured=Intact]*[Timepoint=3]	-4.35798	166.214	1	1	-331.632	322.916
	[Temperature=Control]*[Injured=Intact]*[Timepoint=4]	-0.342048	176.296	1	1	-345.994	345.309
	[Temperature=Control]*[Injured=Intact]*[Timepoint=5]	0.376321	166.214	1	1	-325.525	326.278
	[Temperature=Control]*[Injured=Intact]*[Timepoint=6]	-228.392	176.296	1	1	-683.996	227.213
	[Temperature=Heated]*[Injured=Cut]*[Timepoint=1]	-2.14918	219.88	1	1	-433.843	429.544
	[Temperature=Heated]*[Injured=Cut]*[Timepoint=2]	-240.552	176.296	1	1	-703.636	222.532
	[Temperature=Heated]*[Injured=Cut]*[Timepoint=3]	-2.26228	166.214	1	1	-328.811	324.287
	[Temperature=Heated]*[Injured=Cut]*[Timepoint=4]	-0.823947	166.214	1	1	-326.879	325.231
	[Temperature=Heated]*[Injured=Cut]*[Timepoint=5]	-0.783965	166.214	1	1	-326.825	325.257
	[Temperature=Heated]*[Injured=Intact]*[Timepoint=1]	-2.64108	176.296	1	1	-349.082	343.799
	[Temperature=Heated]*[Injured=Intact]*[Timepoint=2]	-2943.56994b	191.927	1	0	-3659.06	-2228.08
	[Temperature=Heated]*[Injured=Intact]*[Timepoint=3]	-2.68383	191.927	1	1	-379.775	374.407
	[Temperature=Heated]*[Injured=Intact]*[Timepoint=4]	-4.33429	166.214	1	1	-331.6	322.931
	[Temperature=Heated]*[Injured=Intact]*[Timepoint=5]	-1.10052	166.214	1	1	-327.25	325.049
	[Temperature=Heated]*[Injured=Intact]*[Timepoint=6]	-0.316811	176.296	1	1	-345.96	345.326
[Temperature=Heated]*[Injured=Intact]*[Timepoint=1]	[Temperature=Control]*[Injured=Cut]*[Timepoint=1]	2.99522	200.722	1	1	-391.441	397.431
	[Temperature=Control]*[Injured=Cut]*[Timepoint=2]	2.3361	185.833	1	1	-362.69	367.362
	[Temperature=Control]*[Injured=Cut]*[Timepoint=3]	-2.05483	176.296	1	1	-348.294	344.184
	[Temperature=Control]*[Injured=Cut]*[Timepoint=4]	2.55678	185.833	1	1	-362.545	367.659
	[Temperature=Control]*[Injured=Cut]*[Timepoint=5]	3.00879	176.296	1	1	-343.559	349.576
	[Temperature=Control]*[Injured=Cut]*[Timepoint=6]	-92.884	200.722	1	1	-522.872	337.104
	[Temperature=Control]*[Injured=Intact]*[Timepoint=1]	3.00674	185.833	1	1	-362.251	368.264
	[Temperature=Control]*[Injured=Intact]*[Timepoint=2]	2.81142	185.833	1	1	-362.378	368.001
	[Temperature=Control]*[Injured=Intact]*[Timepoint=3]	-1.7169	176.296	1	1	-347.839	344.406
	[Temperature=Control]*[Injured=Intact]*[Timepoint=4]	2.29904	185.833	1	1	-362.714	367.312
	[Temperature=Control]*[Injured=Intact]*[Timepoint=5]	3.01741	176.296	1	1	-343.553	349.588
	[Temperature=Control]*[Injured=Intact]*[Timepoint=6]	-225.751	185.833	1	1	-696.968	245.467
	[Temperature=Heated]*[Injured=Cut]*[Timepoint=1]	0.491908	227.598	1	1	-445.759	446.743
	[Temperature=Heated]*[Injured=Cut]*[Timepoint=2]	-237.911	185.833	1	1	-716.437	240.615
	[Temperature=Heated]*[Injured=Cut]*[Timepoint=3]	0.3788	176.296	1	1	-345.285	346.043
	[Temperature=Heated]*[Injured=Cut]*[Timepoint=4]	1.81714	176.296	1	1	-344.34	347.974
	[Temperature=Heated]*[Injured=Cut]*[Timepoint=5]	1.85712	176.296	1	1	-344.314	348.028
	[Temperature=Heated]*[Injured=Cut]*[Timepoint=6]	2.64108	176.296	1	1	-343.799	349.082
	[Temperature=Heated]*[Injured=Intact]*[Timepoint=2]	-2940.92885b	200.722	1	0	-3689.01	-2192.84
	[Temperature=Heated]*[Injured=Intact]*[Timepoint=3]	-0.0427431	200.722	1	1	-393.466	393.38
	[Temperature=Heated]*[Injured=Intact]*[Timepoint=4]	-1.69321	176.296	1	1	-347.808	344.421
	[Temperature=Heated]*[Injured=Intact]*[Timepoint=5]	1.54056	176.296	1	1	-344.521	347.603
	[Temperature=Heated]*[Injured=Intact]*[Timepoint=6]	2.32427	185.833	1	1	-362.698	367.346
[Temperature=Heated]*[Injured=Intact]*[Timepoint=2]	[Temperature=Control]*[Injured=Cut]*[Timepoint=1]	2943.92407b	214.581	1	0	2140.55	3747.3
	[Temperature=Control]*[Injured=Cut]*[Timepoint=2]	2943.26495b	200.722	1	0	2191.96	3694.57
	[Temperature=Control]*[Injured=Cut]*[Timepoint=3]	2938.87402b	191.927	1	0	2220.66	3657.09
	[Temperature=Control]*[Injured=Cut]*[Timepoint=4]	2943.48563b	200.722	1	0	2192.55	3694.43
	[Temperature=Control]*[Injured=Cut]*[Timepoint=5]	2943.93764b	191.927	1	0	2226.08	3661.8
	[Temperature=Control]*[Injured=Cut]*[Timepoint=6]	2848.04487b	214.581	1	0	2045.65	3650.44
	[Temperature=Control]*[Injured=Intact]*[Timepoint=1]	2943.93559b	200.722	1	0	2193.55	3694.32
	[Temperature=Control]*[Injured=Intact]*[Timepoint=2]	2943.74027b	200.722	1	0	2193.54	3693.94
	[Temperature=Control]*[Injured=Intact]*[Timepoint=3]	2939.21195b	191.927	1	0	2222.07	3656.36
	[Temperature=Control]*[Injured=Intact]*[Timepoint=4]	2943.22789b	200.722	1	0	2193.41	3693.05
	[Temperature=Control]*[Injured=Intact]*[Timepoint=5]	2943.94626b	191.927	1	0	2227.16	3660.73
	[Temperature=Control]*[Injured=Intact]*[Timepoint=6]	2715.17822b	200.722	1	0	1965.74	3464.62
	[Temperature=Heated]*[Injured=Cut]*[Timepoint=1]	2941.42076b	239.909	1	0	2045.9	3836.94
	[Temperature=Heated]*[Injured=Cut]*[Timepoint=2]	2703.01795b	200.722	1	0	1953.96	3452.07
	[Temperature=Heated]*[Injured=Cut]*[Timepoint=3]	2941.30765b	191.927	1	0	2225.26	3657.36
	[Temperature=Heated]*[Injured=Cut]*[Timepoint=4]	2942.74599b	191.927	1	0	2226.88	3658.61
	[Temperature=Heated]*[Injured=Cut]*[Timepoint=5]	2942.78597b	191.927	1	0	2227.11	3658.47
	[Temperature=Heated]*[Injured=Cut]*[Timepoint=6]	2943.56994b	191.927	1	0	2228.08	3659.06
	[Temperature=Heated]*[Injured=Intact]*[Timepoint=1]	2940.92885b	200.722	1	0	2192.84	3689.01
	[Temperature=Heated]*[Injured=Intact]*[Timepoint=3]	2940.88611b	214.581	1	0	2141.36	3740.41
	[Temperature=Heated]*[Injured=Intact]*[Timepoint=4]	2939.23564b	191.927	1	0	2224.31	3654.17
	[Temperature=Heated]*[Injured=Intact]*[Timepoint=5]	2942.46942b	191.927	1	0	2227.73	3657.21
	[Temperature=Heated]*[Injured=Intact]*[Timepoint=6]	2943.25313b	200.722	1	0	2195.96	3690.55
[Temperature=Heated]*[Injured=Intact]*[Timepoint=3]	[Temperature=Control]*[Injured=Cut]*[Timepoint=1]	3.03796	214.581	1	1	-418.575	424.651
	[Temperature=Control]*[Injured=Cut]*[Timepoint=2]	2.37884	200.722	1	1	-391.845	396.602
	[Temperature=Control]*[Injured=Cut]*[Timepoint=3]	-2.01209	191.927	1	1	-378.872	374.848
	[Temperature=Control]*[Injured=Cut]*[Timepoint=4]	2.59952	200.722	1	1	-391.7	396.899
	[Temperature=Control]*[Injured=Cut]*[Timepoint=5]	3.05153	191.927	1	1	-374.166	380.269
	[Temperature=Control]*[Injured=Cut]*[Timepoint=6]	-92.8412	214.581	1	1	-549.662	363.979
	[Temperature=Control]*[Injured=Intact]*[Timepoint=1]	3.04948	200.722	1	1	-391.405	397.504
	[Temperature=Control]*[Injured=Intact]*[Timepoint=2]	2.85417	200.722	1	1	-391.533	397.241
	[Temperature=Control]*[Injured=Intact]*[Timepoint=3]	-1.67416	191.927	1	1	-378.418	375.069
	[Temperature=Control]*[Injured=Intact]*[Timepoint=4]	2.34178	200.722	1	1	-391.869	396.553
	[Temperature=Control]*[Injured=Intact]*[Timepoint=5]	3.06015	191.927	1	1	-374.16	380.281
	[Temperature=Control]*[Injured=Intact]*[Timepoint=6]	-225.708	200.722	1	1	-724.033	272.618
	[Temperature=Heated]*[Injured=Cut]*[Timepoint=1]	0.534651	239.909	1	1	-469.861	470.93
	[Temperature=Heated]*[Injured=Cut]*[Timepoint=2]	-237.868	200.722	1	1	-743.303	267.567
	[Temperature=Heated]*[Injured=Cut]*[Timepoint=3]	0.421543	191.927	1	1	-375.893	376.736
	[Temperature=Heated]*[Injured=Cut]*[Timepoint=4]	1.85988	191.927	1	1	-374.947	378.667
	[Temperature=Heated]*[Injured=Cut]*[Timepoint=5]	1.89986	191.927	1	1	-374.921	378.721
	[Temperature=Heated]*[Injured=Cut]*[Timepoint=6]	2.68383	191.927	1	1	-374.407	379.775
	[Temperature=Heated]*[Injured=Intact]*[Timepoint=1]	0.0427431	200.722	1	1	-393.38	393.466
	[Temperature=Heated]*[Injured=Intact]*[Timepoint=2]	-2940.88611b	214.581	1	0	-3740.41	-2141.36
	[Temperature=Heated]*[Injured=Intact]*[Timepoint=4]	-1.65047	191.927	1	1	-378.386	375.085
	[Temperature=Heated]*[Injured=Intact]*[Timepoint=5]	1.58331	191.927	1	1	-375.129	378.296
	[Temperature=Heated]*[Injured=Intact]*[Timepoint=6]	2.36702	200.722	1	1	-391.853	396.587
[Temperature=Heated]*[Injured=Intact]*[Timepoint=4]	[Temperature=Control]*[Injured=Cut]*[Timepoint=1]	4.68843	191.927	1	1	-373.095	382.472
	[Temperature=Control]*[Injured=Cut]*[Timepoint=2]	4.02931	176.296	1	1	-342.891	350.95
	[Temperature=Control]*[Injured=Cut]*[Timepoint=3]	-0.36162	166.214	1	1	-326.258	325.535
	[Temperature=Control]*[Injured=Cut]*[Timepoint=4]	4.24999	176.296	1	1	-342.747	351.247
	[Temperature=Control]*[Injured=Cut]*[Timepoint=5]	4.702	166.214	1	1	-322.691	332.095
	[Temperature=Control]*[Injured=Cut]*[Timepoint=6]	-91.1908	191.927	1	1	-503.4	321.018
	[Temperature=Control]*[Injured=Intact]*[Timepoint=1]	4.69994	176.296	1	1	-342.453	351.853
	[Temperature=Control]*[Injured=Intact]*[Timepoint=2]	4.50463	176.296	1	1	-342.581	351.59
	[Temperature=Control]*[Injured=Intact]*[Timepoint=3]	-0.02369	166.214	1	1	-325.805	325.758
	[Temperature=Control]*[Injured=Intact]*[Timepoint=4]	3.99224	176.296	1	1	-342.915	350.9
	[Temperature=Control]*[Injured=Intact]*[Timepoint=5]	4.71061	166.214	1	1	-322.686	332.107
	[Temperature=Control]*[Injured=Intact]*[Timepoint=6]	-224.057	176.296	1	1	-677.03	228.916
	[Temperature=Heated]*[Injured=Cut]*[Timepoint=1]	2.18512	219.88	1	1	-429.521	433.891
	[Temperature=Heated]*[Injured=Cut]*[Timepoint=2]	-236.218	176.296	1	1	-696.619	224.184
	[Temperature=Heated]*[Injured=Cut]*[Timepoint=3]	2.07201	166.214	1	1	-324.411	328.555
	[Temperature=Heated]*[Injured=Cut]*[Timepoint=4]	3.51035	166.214	1	1	-323.469	330.49
	[Temperature=Heated]*[Injured=Cut]*[Timepoint=5]	3.55033	166.214	1	1	-323.443	330.544
	[Temperature=Heated]*[Injured=Cut]*[Timepoint=6]	4.33429	166.214	1	1	-322.931	331.6
	[Temperature=Heated]*[Injured=Intact]*[Timepoint=1]	1.69321	176.296	1	1	-344.421	347.808
	[Temperature=Heated]*[Injured=Intact]*[Timepoint=2]	-2939.23564b	191.927	1	0	-3654.17	-2224.31
	[Temperature=Heated]*[Injured=Intact]*[Timepoint=3]	1.65047	191.927	1	1	-375.085	378.386
	[Temperature=Heated]*[Injured=Intact]*[Timepoint=5]	3.23377	166.214	1	1	-323.65	330.118
	[Temperature=Heated]*[Injured=Intact]*[Timepoint=6]	4.01748	176.296	1	1	-342.899	350.934
[Temperature=Heated]*[Injured=Intact]*[Timepoint=5]	[Temperature=Control]*[Injured=Cut]*[Timepoint=1]	1.45466	191.927	1	1	-375.214	378.123
	[Temperature=Control]*[Injured=Cut]*[Timepoint=2]	0.795538	176.296	1	1	-345.011	346.602
	[Temperature=Control]*[Injured=Cut]*[Timepoint=3]	-3.59539	166.214	1	1	-330.605	323.414
	[Temperature=Control]*[Injured=Cut]*[Timepoint=4]	1.01622	176.296	1	1	-344.866	346.898
	[Temperature=Control]*[Injured=Cut]*[Timepoint=5]	1.46823	166.214	1	1	-324.808	327.744
	[Temperature=Control]*[Injured=Cut]*[Timepoint=6]	-94.4245	191.927	1	1	-508.09	319.24
	[Temperature=Control]*[Injured=Intact]*[Timepoint=1]	1.46617	176.296	1	1	-344.57	347.503
	[Temperature=Control]*[Injured=Intact]*[Timepoint=2]	1.27086	176.296	1	1	-344.699	347.24
	[Temperature=Control]*[Injured=Intact]*[Timepoint=3]	-3.25746	166.214	1	1	-330.15	323.635
	[Temperature=Control]*[Injured=Intact]*[Timepoint=4]	0.758474	176.296	1	1	-345.035	346.552
	[Temperature=Control]*[Injured=Intact]*[Timepoint=5]	1.47684	166.214	1	1	-324.802	327.756
	[Temperature=Control]*[Injured=Intact]*[Timepoint=6]	-227.291	176.296	1	1	-682.226	227.643
	[Temperature=Heated]*[Injured=Cut]*[Timepoint=1]	-1.04865	219.88	1	1	-432.365	430.267
	[Temperature=Heated]*[Injured=Cut]*[Timepoint=2]	-239.451	176.296	1	1	-701.852	222.949
	[Temperature=Heated]*[Injured=Cut]*[Timepoint=3]	-1.16176	166.214	1	1	-327.332	325.009
	[Temperature=Heated]*[Injured=Cut]*[Timepoint=4]	0.276575	166.214	1	1	-325.591	326.144
	[Temperature=Heated]*[Injured=Cut]*[Timepoint=5]	0.316557	166.214	1	1	-325.565	326.198
	[Temperature=Heated]*[Injured=Cut]*[Timepoint=6]	1.10052	166.214	1	1	-325.049	327.25
	[Temperature=Heated]*[Injured=Intact]*[Timepoint=1]	-1.54056	176.296	1	1	-347.603	344.521
	[Temperature=Heated]*[Injured=Intact]*[Timepoint=2]	-2942.46942b	191.927	1	0	-3657.21	-2227.73
	[Temperature=Heated]*[Injured=Intact]*[Timepoint=3]	-1.58331	191.927	1	1	-378.296	375.129
	[Temperature=Heated]*[Injured=Intact]*[Timepoint=4]	-3.23377	166.214	1	1	-330.118	323.65
	[Temperature=Heated]*[Injured=Intact]*[Timepoint=6]	0.783711	176.296	1	1	-345.019	346.586
[Temperature=Heated]*[Injured=Intact]*[Timepoint=6]	[Temperature=Control]*[Injured=Cut]*[Timepoint=1]	0.670946	200.722	1	1	-392.967	394.309
	[Temperature=Control]*[Injured=Cut]*[Timepoint=2]	0.0118275	185.833	1	1	-364.218	364.241
	[Temperature=Control]*[Injured=Cut]*[Timepoint=3]	-4.3791	176.296	1	1	-351.421	342.663
	[Temperature=Control]*[Injured=Cut]*[Timepoint=4]	0.232507	185.833	1	1	-364.072	364.537
	[Temperature=Control]*[Injured=Cut]*[Timepoint=5]	0.684516	176.296	1	1	-345.084	346.453
	[Temperature=Control]*[Injured=Cut]*[Timepoint=6]	-95.2083	200.722	1	1	-526.235	335.818
	[Temperature=Control]*[Injured=Intact]*[Timepoint=1]	0.682463	185.833	1	1	-363.776	365.141
	[Temperature=Control]*[Injured=Intact]*[Timepoint=2]	0.487149	185.833	1	1	-363.905	364.879
	[Temperature=Control]*[Injured=Intact]*[Timepoint=3]	-4.04117	176.296	1	1	-350.966	342.883
	[Temperature=Control]*[Injured=Intact]*[Timepoint=4]	-0.0252369	185.833	1	1	-364.259	364.209
	[Temperature=Control]*[Injured=Intact]*[Timepoint=5]	0.693132	176.296	1	1	-345.078	346.465
	[Temperature=Control]*[Injured=Intact]*[Timepoint=6]	-228.075	185.833	1	1	-700.679	244.529
	[Temperature=Heated]*[Injured=Cut]*[Timepoint=1]	-1.83237	227.598	1	1	-448.543	444.878
	[Temperature=Heated]*[Injured=Cut]*[Timepoint=2]	-240.235	185.833	1	1	-720.173	239.703
	[Temperature=Heated]*[Injured=Cut]*[Timepoint=3]	-1.94547	176.296	1	1	-348.147	344.256
	[Temperature=Heated]*[Injured=Cut]*[Timepoint=4]	-0.507136	176.296	1	1	-346.215	345.201
	[Temperature=Heated]*[Injured=Cut]*[Timepoint=5]	-0.467154	176.296	1	1	-346.161	345.227
	[Temperature=Heated]*[Injured=Cut]*[Timepoint=6]	0.316811	176.296	1	1	-345.326	345.96
	[Temperature=Heated]*[Injured=Intact]*[Timepoint=1]	-2.32427	185.833	1	1	-367.346	362.698
	[Temperature=Heated]*[Injured=Intact]*[Timepoint=2]	-2943.25313b	200.722	1	0	-3690.55	-2195.96
	[Temperature=Heated]*[Injured=Intact]*[Timepoint=3]	-2.36702	200.722	1	1	-396.587	391.853
	[Temperature=Heated]*[Injured=Intact]*[Timepoint=4]	-4.01748	176.296	1	1	-350.934	342.899
	[Temperature=Heated]*[Injured=Intact]*[Timepoint=5]	-0.783711	176.296	1	1	-346.586	345.019
Pairwise comparisons of estimated marginal means based on the original scale of dependent variable Catalase
a. Confidence interval bounds are approximate.
b. The mean difference is significant at the .05 level.
Overall Test Results
Wald Chi-Square	df	Sig.
365.272	23	0
The Wald chi-square tests the effect of Temperature*Injured*Timepoint. This test is based on the linearly independent pairwise comparisons among the estimated marginal means.
* Generalized Linear Models.
GENLIN HSP70 BY Temperature Injured Timepoint (ORDER=ASCENDING)
/MODEL Temperature Injured Timepoint Injured*Timepoint Temperature*Timepoint
Temperature*Injured*Timepoint INTERCEPT=YES
DISTRIBUTION=NORMAL LINK=IDENTITY
/CRITERIA SCALE=MLE COVB=MODEL PCONVERGE=1E-006(ABSOLUTE) SINGULAR=1E-012 ANALYSISTYPE=3(WALD)
CILEVEL=95 CITYPE=WALD LIKELIHOOD=FULL
/EMMEANS SCALE=ORIGINAL
/EMMEANS TABLES=Temperature SCALE=ORIGINAL COMPARE=Temperature CONTRAST=PAIRWISE
PADJUST=SEQBONFERRONI
/EMMEANS TABLES=Injured SCALE=ORIGINAL COMPARE=Injured CONTRAST=PAIRWISE PADJUST=SEQBONFERRONI
/EMMEANS TABLES=Timepoint SCALE=ORIGINAL COMPARE=Timepoint CONTRAST=PAIRWISE PADJUST=SEQBONFERRONI
/EMMEANS TABLES=Injured*Timepoint SCALE=ORIGINAL COMPARE=Injured*Timepoint CONTRAST=PAIRWISE
PADJUST=SEQBONFERRONI
/EMMEANS TABLES=Temperature*Timepoint SCALE=ORIGINAL COMPARE=Temperature*Timepoint
CONTRAST=PAIRWISE PADJUST=SEQBONFERRONI
/EMMEANS TABLES=Temperature*Injured*Timepoint SCALE=ORIGINAL
COMPARE=Temperature*Injured*Timepoint CONTRAST=PAIRWISE PADJUST=SEQBONFERRONI
/MISSING CLASSMISSING=EXCLUDE
/PRINT CPS DESCRIPTIVES MODELINFO FIT SUMMARY SOLUTION.
Generalized Linear Models
Notes
Output Created		08-MAR-2017 13:09:24
Comments
Input	Data	/Bill/JCU/Paper/Josh Injury paper/Josh PCR stats.sav
	Active Dataset	DataSet1
	Filter	<none>
	Weight	<none>
	Split File	<none>
	N of Rows in Working Data File	122
Missing Value Handling	Definition of Missing	User-defined missing values for factor, subject and within-subject variables are treated as missing.
	Cases Used	Statistics are based on cases with valid data for all variables in the model.
Weight Handling		not applicable
Syntax		GENLIN HSP70 BY Temperature Injured Timepoint (ORDER=ASCENDING) /MODEL Temperature Injured Timepoint Injured*Timepoint Temperature*Timepoint Temperature*Injured*Timepoint INTERCEPT=YES DISTRIBUTION=NORMAL LINK=IDENTITY /CRITERIA SCALE=MLE COVB=MODEL PCONVERGE=1E-006(ABSOLUTE) SINGULAR=1E-012 ANALYSISTYPE=3(WALD) CILEVEL=95 CITYPE=WALD LIKELIHOOD=FULL /EMMEANS SCALE=ORIGINAL /EMMEANS TABLES=Temper…
Resources	Processor Time	00:00:00.61
	Elapsed Time	00:00:00.00
Model Information
Dependent Variable	HSP70
Probability Distribution	Normal
Link Function	Identity
Case Processing Summary
	N	Percent
Included	100	0.819672
Excluded	22	0.180328
Total	122	1
Categorical Variable Information
			N	Percent
Factor	Temperature	Control	50	0.5
		Heated	50	0.5
		Total	100	1
	Injured	Cut	50	0.5
		Intact	50	0.5
		Total	100	1
	Timepoint	1	13	0.13
		2	15	0.15
		3	18	0.18
		4	18	0.18
		5	20	0.2
		6	16	0.16
		Total	100	1
Continuous Variable Information
		N	Minimum	Maximum	Mean	Std. Deviation
Dependent Variable	HSP70	100	0.0107454	139.221	6.71449	19.4391
Goodness of Fita
	Value	df	Value/df
Deviance	15932.5	76	209.638
Scaled Deviance	100	76
Pearson Chi-Square	15932.5	76	209.638
Scaled Pearson Chi-Square	100	76
Log Likelihoodb	-395.441
Akaike's Information Criterion (AIC)	840.882
Finite Sample Corrected AIC (AICC)	858.45
Bayesian Information Criterion (BIC)	906.012
Consistent AIC (CAIC)	931.012
Dependent Variable: HSP70 Model: (Intercept), Temperature, Injured, Timepoint, Injured * Timepoint, Temperature * Timepoint, Temperature * Injured * Timepoint
a. Information criteria are in smaller-is-better form.
b. The full log likelihood function is displayed and used in computing information criteria.
Omnibus Testa
Likelihood Ratio Chi-Square	df	Sig.
85.3574	23	4.21836e-09
Dependent Variable: HSP70 Model: (Intercept), Temperature, Injured, Timepoint, Injured * Timepoint, Temperature * Timepoint, Temperature * Injured * Timepoint
a. Compares the fitted model against the intercept-only model.
Tests of Model Effects
Source	Type III
	Wald Chi-Square	df	Sig.
(Intercept)	33.9326	1	5.70534e-09
Temperature	18.453	1	1.74149e-05
Injured	0.00390967	1	0.950143
Timepoint	58.9005	5	2.05044e-11
Injured * Timepoint	0.172719	5	0.99938
Temperature * Timepoint	68.6692	5	1.93845e-13
Temperature * Injured * Timepoint	0.203247	6	0.999838
Dependent Variable: HSP70 Model: (Intercept), Temperature, Injured, Timepoint, Injured * Timepoint, Temperature * Timepoint, Temperature * Injured * Timepoint
Parameter Estimates
Parameter	B	Std. Error	95% Wald Confidence Interval		Hypothesis Test
			Lower	Upper	Wald Chi-Square	df	Sig.
(Intercept)	0.0633191	6.3112	-12.3064	12.433	0.000100657	1	0.991995
[Temperature=Control ]	60.0553	8.92538	42.5618	77.5487	45.274	1	1.71312e-11
[Temperature=Heated ]	0a
[Injured=Cut ]	-0.00193392	8.46736	-16.5977	16.5938	5.21653e-08	1	0.999818
[Injured=Intact ]	0a
[Timepoint=1]	3.67889	8.92538	-13.8145	21.1723	0.169895	1	0.680205
[Timepoint=2]	0.282722	9.64052	-18.6123	19.1778	0.000860041	1	0.976604
[Timepoint=3]	5.99704	9.64052	-12.898	24.8921	0.386967	1	0.533898
[Timepoint=4]	3.01002	8.46736	-13.5857	19.6057	0.12637	1	0.722226
[Timepoint=5]	0.0204879	8.46736	-16.5752	16.6162	5.8546e-06	1	0.998069
[Timepoint=6]	0a
[Injured=Cut ] * [Timepoint=1]	-1.56128	13.8271	-28.662	25.5394	0.0127495	1	0.910099
[Injured=Cut ] * [Timepoint=2]	0.655917	12.831	-24.4925	25.8043	0.00261321	1	0.95923
[Injured=Cut ] * [Timepoint=3]	-0.464998	12.5168	-24.9974	24.0674	0.00138012	1	0.970365
[Injured=Cut ] * [Timepoint=4]	-1.56014	11.6373	-24.3688	21.2485	0.0179732	1	0.893352
[Injured=Cut ] * [Timepoint=5]	0.0121531	11.6373	-22.7965	22.8208	1.09061e-06	1	0.999167
[Injured=Cut ] * [Timepoint=6]	0a
[Injured=Intact ] * [Timepoint=1]	0a
[Injured=Intact ] * [Timepoint=2]	0a
[Injured=Intact ] * [Timepoint=3]	0a
[Injured=Intact ] * [Timepoint=4]	0a
[Injured=Intact ] * [Timepoint=5]	0a
[Injured=Intact ] * [Timepoint=6]	0a
[Temperature=Control ] * [Timepoint=1]	-62.8095	12.6224	-87.549	-38.0701	24.761	1	6.4899e-07
[Temperature=Control ] * [Timepoint=2]	-57.2604	13.1378	-83.01	-31.5107	18.996	1	1.30992e-05
[Temperature=Control ] * [Timepoint=3]	-64.202	12.831	-89.3504	-39.0536	25.0364	1	5.6257e-07
[Temperature=Control ] * [Timepoint=4]	-53.3023	12.3028	-77.4153	-29.1892	18.7708	1	1.47404e-05
[Temperature=Control ] * [Timepoint=5]	-59.7931	11.9747	-83.263	-36.3232	24.9331	1	5.93543e-07
[Temperature=Control ] * [Timepoint=6]	0a
[Temperature=Heated ] * [Timepoint=1]	0a
[Temperature=Heated ] * [Timepoint=2]	0a
[Temperature=Heated ] * [Timepoint=3]	0a
[Temperature=Heated ] * [Timepoint=4]	0a
[Temperature=Heated ] * [Timepoint=5]	0a
[Temperature=Heated ] * [Timepoint=6]	0a
[Temperature=Control ] * [Injured=Cut ] * [Timepoint=1]	2.65819	14.5751	-25.9085	31.2248	0.0332621	1	0.855285
[Temperature=Control ] * [Injured=Cut ] * [Timepoint=2]	3.29244	13.1378	-22.4572	29.0421	0.0628043	1	0.802117
[Temperature=Control ] * [Injured=Cut ] * [Timepoint=3]	2.13389	12.1944	-21.7667	26.0345	0.0306212	1	0.861088
[Temperature=Control ] * [Injured=Cut ] * [Timepoint=4]	2.34311	11.9747	-21.1268	25.813	0.0382875	1	0.844867
[Temperature=Control ] * [Injured=Cut ] * [Timepoint=5]	-0.114288	11.2898	-22.2419	22.0133	0.000102476	1	0.991923
[Temperature=Control ] * [Injured=Cut ] * [Timepoint=6]	-2.50681	12.831	-27.6552	22.6416	0.0381697	1	0.845103
[Temperature=Control ] * [Injured=Intact ] * [Timepoint=1]	0a
[Temperature=Control ] * [Injured=Intact ] * [Timepoint=2]	0a
[Temperature=Control ] * [Injured=Intact ] * [Timepoint=3]	0a
[Temperature=Control ] * [Injured=Intact ] * [Timepoint=4]	0a
[Temperature=Control ] * [Injured=Intact ] * [Timepoint=5]	0a
[Temperature=Control ] * [Injured=Intact ] * [Timepoint=6]	0a
[Temperature=Heated ] * [Injured=Cut ] * [Timepoint=1]	0a
[Temperature=Heated ] * [Injured=Cut ] * [Timepoint=2]	0a
[Temperature=Heated ] * [Injured=Cut ] * [Timepoint=3]	0a
[Temperature=Heated ] * [Injured=Cut ] * [Timepoint=4]	0a
[Temperature=Heated ] * [Injured=Cut ] * [Timepoint=5]	0a
[Temperature=Heated ] * [Injured=Cut ] * [Timepoint=6]	0a
[Temperature=Heated ] * [Injured=Intact ] * [Timepoint=1]	0a
[Temperature=Heated ] * [Injured=Intact ] * [Timepoint=2]	0a
[Temperature=Heated ] * [Injured=Intact ] * [Timepoint=3]	0a
[Temperature=Heated ] * [Injured=Intact ] * [Timepoint=4]	0a
[Temperature=Heated ] * [Injured=Intact ] * [Timepoint=5]	0a
[Temperature=Heated ] * [Injured=Intact ] * [Timepoint=6]	0a
(Scale)	159.325b	22.532	120.755	210.214
Dependent Variable: HSP70 Model: (Intercept), Temperature, Injured, Timepoint, Injured * Timepoint, Temperature * Timepoint, Temperature * Injured * Timepoint
a. Set to zero because this parameter is redundant.
b. Maximum likelihood estimate.
Estimated Marginal Means 1: Grand Mean
Estimates
Mean	Std. Error	95% Wald Confidence Interval
		Lower	Upper
7.55632	1.29718	5.01389	10.0988
Estimated Marginal Means 2: Temperature
Estimates
Temperature	Mean	Std. Error	95% Wald Confidence Interval
			Lower	Upper
Control	13.1286	1.81174	9.57768	16.6796
Heated	1.98402	1.85697	-1.65558	5.62362
Pairwise Comparisons
(I) Temperature		Mean Difference (I-J)	Std. Error	df	Sequential Bonferroni Sig.	95% Wald Confidence Interval for Differenceb
						Lower	Upper
Control	Heated	11.14460a	2.59437	1	1.74149e-05	6.05974	16.2295
Heated	Control	-11.14460a	2.59437	1	1.74149e-05	-16.2295	-6.05974
Pairwise comparisons of estimated marginal means based on the original scale of dependent variable HSP70
a. The mean difference is significant at the .05 level.
b. Confidence interval bounds are approximate.
Overall Test Results
Wald Chi-Square	df	Sig.
18.453	1	1.74149e-05
The Wald chi-square tests the effect of Temperature. This test is based on the linearly independent pairwise comparisons among the estimated marginal means.
Estimated Marginal Means 3: Injured
Estimates
Injured	Mean	Std. Error	95% Wald Confidence Interval
			Lower	Upper
Cut	7.63743	1.85697	3.99783	11.277
Intact	7.47521	1.81174	3.92427	11.0261
Pairwise Comparisons
(I) Injured		Mean Difference (I-J)	Std. Error	df	Sequential Bonferroni Sig.	95% Wald Confidence Interval for Differencea
						Lower	Upper
Cut	Intact	0.162219	2.59437	1	0.950143	-4.92265	5.24709
Intact	Cut	-0.162219	2.59437	1	0.950143	-5.24709	4.92265
Pairwise comparisons of estimated marginal means based on the original scale of dependent variable HSP70
a. Confidence interval bounds are approximate.
Overall Test Results
Wald Chi-Square	df	Sig.
0.00390967	1	0.950143
The Wald chi-square tests the effect of Injured. This test is based on the linearly independent pairwise comparisons among the estimated marginal means.
Estimated Marginal Means 4: Timepoint
Estimates
Timepoint	Mean	Std. Error	95% Wald Confidence Interval
			Lower	Upper
1	2.24802	3.64377	-4.89364	9.38969
2	2.89359	3.28445	-3.54381	9.331
3	4.28701	3.0486	-1.68813	10.2622
4	6.25459	2.99366	0.387115	12.1221
5	0.19141	2.82245	-5.3405	5.72332
6	29.4633	3.20776	23.1762	35.7504
Pairwise Comparisons
(I) Timepoint		Mean Difference (I-J)	Std. Error	df	Sequential Bonferroni Sig.	95% Wald Confidence Interval for Differencea
						Lower	Upper
1	2	-0.645572	4.90558	1	1	-10.4904	9.19922
	3	-2.03899	4.7509	1	1	-12.1459	8.06791
	4	-4.00657	4.71584	1	1	-14.997	6.9839
	5	2.05661	4.60905	1	1	-7.78307	11.8963
	6	-27.21526b	4.85457	1	2.48301e-07	-41.1249	-13.3057
2	1	0.645572	4.90558	1	1	-9.19922	10.4904
	3	-1.39342	4.48125	1	1	-10.7014	7.91459
	4	-3.361	4.44406	1	1	-13.5035	6.78152
	5	2.70219	4.33057	1	1	-6.89813	12.3025
	6	-26.56969b	4.59101	1	1.00119e-07	-39.9466	-13.1927
3	1	2.03899	4.7509	1	1	-8.06791	12.1459
	2	1.39342	4.48125	1	1	-7.91459	10.7014
	4	-1.96758	4.2727	1	1	-11.1163	7.18114
	5	4.09561	4.15454	1	1	-5.89243	14.0836
	6	-25.17627b	4.42535	1	1.66017e-07	-37.9678	-12.3848
4	1	4.00657	4.71584	1	1	-6.9839	14.997
	2	3.361	4.44406	1	1	-6.78152	13.5035
	3	1.96758	4.2727	1	1	-7.18114	11.1163
	5	6.06318	4.1144	1	1	-5.48608	17.6124
	6	-23.20870b	4.38768	1	1.34909e-06	-35.6592	-10.7582
5	1	-2.05661	4.60905	1	1	-11.8963	7.78307
	2	-2.70219	4.33057	1	1	-12.3025	6.89813
	3	-4.09561	4.15454	1	1	-14.0836	5.89243
	4	-6.06318	4.1144	1	1	-17.6124	5.48608
	6	-29.27188b	4.2727	1	1.10077e-10	-41.8131	-16.7306
6	1	27.21526b	4.85457	1	2.48301e-07	13.3057	41.1249
	2	26.56969b	4.59101	1	1.00119e-07	13.1927	39.9466
	3	25.17627b	4.42535	1	1.66017e-07	12.3848	37.9678
	4	23.20870b	4.38768	1	1.34909e-06	10.7582	35.6592
	5	29.27188b	4.2727	1	1.10077e-10	16.7306	41.8131
Pairwise comparisons of estimated marginal means based on the original scale of dependent variable HSP70
a. Confidence interval bounds are approximate.
b. The mean difference is significant at the .05 level.
Overall Test Results
Wald Chi-Square	df	Sig.
58.9005	5	2.05044e-11
The Wald chi-square tests the effect of Timepoint. This test is based on the linearly independent pairwise comparisons among the estimated marginal means.
Estimated Marginal Means 5: Injured* Timepoint
Estimates
Injured		Mean	Std. Error	95% Wald Confidence Interval
				Lower	Upper
Cut	1	2.13096	5.76131	-9.161	13.4229
	2	4.0437	4.46269	-4.70302	12.7904
	3	4.58702	3.99155	-3.23628	12.4103
	4	6.05933	4.23368	-2.23853	14.3572
	5	0.167947	3.99155	-7.65535	7.99125
	6	28.8356	4.60905	19.802	37.8692
Intact	1	2.36508	4.46269	-6.38164	11.1118
	2	1.74349	4.82026	-7.70404	11.191
	3	3.98701	4.60905	-5.04656	13.0206
	4	6.44985	4.23368	-1.84801	14.7477
	5	0.214872	3.99155	-7.60843	8.03817
	6	30.091	4.46269	21.3442	38.8377
Pairwise Comparisons
(I) Injured*Timepoint		Mean Difference (I-J)	Std. Error	df	Sequential Bonferroni Sig.	95% Wald Confidence Interval for Differencea
						Lower	Upper
[Injured=Cut]*[Timepoint=1]	[Injured=Cut]*[Timepoint=2]	-1.91273	7.28755	1	1	-16.9061	13.0806
	[Injured=Cut]*[Timepoint=3]	-2.45606	7.00894	1	1	-17.1295	12.2174
	[Injured=Cut]*[Timepoint=4]	-3.92836	7.1496	1	1	-19.5263	11.6696
	[Injured=Cut]*[Timepoint=5]	1.96302	7.00894	1	1	-12.5069	16.4329
	[Injured=Cut]*[Timepoint=6]	-26.70465b	7.37808	1	0.0141705	-50.8975	-2.51176
	[Injured=Intact]*[Timepoint=1]	-0.234116	7.28755	1	1	-14.5982	14.13
	[Injured=Intact]*[Timepoint=2]	0.387472	7.51183	1	1	-14.47	15.2449
	[Injured=Intact]*[Timepoint=3]	-1.85604	7.37808	1	1	-17.0035	13.2914
	[Injured=Intact]*[Timepoint=4]	-4.31889	7.1496	1	1	-20.1005	11.4628
	[Injured=Intact]*[Timepoint=5]	1.91609	7.00894	1	1	-12.5348	16.367
	[Injured=Intact]*[Timepoint=6]	-27.95999b	7.28755	1	0.00636011	-51.9804	-3.93956
[Injured=Cut]*[Timepoint=2]	[Injured=Cut]*[Timepoint=1]	1.91273	7.28755	1	1	-13.0806	16.9061
	[Injured=Cut]*[Timepoint=3]	-0.543325	5.98733	1	1	-12.4693	11.3827
	[Injured=Cut]*[Timepoint=4]	-2.01563	6.1514	1	1	-14.8353	10.804
	[Injured=Cut]*[Timepoint=5]	3.87575	5.98733	1	1	-9.46487	17.2164
	[Injured=Cut]*[Timepoint=6]	-24.79192b	6.41552	1	0.00590309	-46.0073	-3.57652
	[Injured=Intact]*[Timepoint=1]	1.67862	6.3112	1	1	-11.3149	14.6721
	[Injured=Intact]*[Timepoint=2]	2.3002	6.56891	1	1	-11.4513	16.0517
	[Injured=Intact]*[Timepoint=3]	0.0566876	6.41552	1	1	-12.5369	12.6503
	[Injured=Intact]*[Timepoint=4]	-2.40616	6.1514	1	1	-15.3909	10.5786
	[Injured=Intact]*[Timepoint=5]	3.82882	5.98733	1	1	-9.48906	17.1467
	[Injured=Intact]*[Timepoint=6]	-26.04726b	6.3112	1	0.002167	-47.1065	-4.98798
[Injured=Cut]*[Timepoint=3]	[Injured=Cut]*[Timepoint=1]	2.45606	7.00894	1	1	-12.2174	17.1295
	[Injured=Cut]*[Timepoint=2]	0.543325	5.98733	1	1	-11.3827	12.4693
	[Injured=Cut]*[Timepoint=4]	-1.47231	5.81864	1	1	-13.4216	10.477
	[Injured=Cut]*[Timepoint=5]	4.41907	5.64491	1	1	-8.54064	17.3788
	[Injured=Cut]*[Timepoint=6]	-24.24860b	6.0972	1	0.00383836	-44.4745	-4.02268
	[Injured=Intact]*[Timepoint=1]	2.22194	5.98733	1	1	-10.3652	14.809
	[Injured=Intact]*[Timepoint=2]	2.84353	6.25839	1	1	-10.5398	16.2269
	[Injured=Intact]*[Timepoint=3]	0.600012	6.0972	1	1	-11.5618	12.7618
	[Injured=Intact]*[Timepoint=4]	-1.86283	5.81864	1	1	-13.9709	10.2452
	[Injured=Intact]*[Timepoint=5]	4.37215	5.64491	1	1	-8.56351	17.3078
	[Injured=Intact]*[Timepoint=6]	-25.50394b	5.98733	1	0.00122848	-45.5105	-5.4974
[Injured=Cut]*[Timepoint=4]	[Injured=Cut]*[Timepoint=1]	3.92836	7.1496	1	1	-11.6696	19.5263
	[Injured=Cut]*[Timepoint=2]	2.01563	6.1514	1	1	-10.804	14.8353
	[Injured=Cut]*[Timepoint=3]	1.47231	5.81864	1	1	-10.477	13.4216
	[Injured=Cut]*[Timepoint=5]	5.89138	5.81864	1	1	-8.18368	19.9664
	[Injured=Cut]*[Timepoint=6]	-22.77629b	6.25839	1	0.0133944	-43.3341	-2.2185
	[Injured=Intact]*[Timepoint=1]	3.69425	6.1514	1	1	-9.87373	17.2622
	[Injured=Intact]*[Timepoint=2]	4.31584	6.41552	1	1	-10.0584	18.69
	[Injured=Intact]*[Timepoint=3]	2.07232	6.25839	1	1	-10.9793	15.1239
	[Injured=Intact]*[Timepoint=4]	-0.390522	5.98733	1	1	-12.2617	11.4806
	[Injured=Intact]*[Timepoint=5]	5.84446	5.81864	1	1	-8.20443	19.8933
	[Injured=Intact]*[Timepoint=6]	-24.03163b	6.1514	1	0.00505264	-44.4058	-3.65748
[Injured=Cut]*[Timepoint=5]	[Injured=Cut]*[Timepoint=1]	-1.96302	7.00894	1	1	-16.4329	12.5069
	[Injured=Cut]*[Timepoint=2]	-3.87575	5.98733	1	1	-17.2164	9.46487
	[Injured=Cut]*[Timepoint=3]	-4.41907	5.64491	1	1	-17.3788	8.54064
	[Injured=Cut]*[Timepoint=4]	-5.89138	5.81864	1	1	-19.9664	8.18368
	[Injured=Cut]*[Timepoint=6]	-28.66767b	6.0972	1	0.00016506	-49.1503	-8.18502
	[Injured=Intact]*[Timepoint=1]	-2.19713	5.98733	1	1	-14.7737	10.3794
	[Injured=Intact]*[Timepoint=2]	-1.57555	6.25839	1	1	-14.4247	11.2736
	[Injured=Intact]*[Timepoint=3]	-3.81906	6.0972	1	1	-17.3427	9.70461
	[Injured=Intact]*[Timepoint=4]	-6.2819	5.81864	1	1	-25.2914	12.7276
	[Injured=Intact]*[Timepoint=5]	-0.0469246	5.64491	1	1	-11.1268	11.033
	[Injured=Intact]*[Timepoint=6]	-29.92301b	5.98733	1	3.82876e-05	-50.0874	-9.7586
[Injured=Cut]*[Timepoint=6]	[Injured=Cut]*[Timepoint=1]	26.70465b	7.37808	1	0.0141705	2.51176	50.8975
	[Injured=Cut]*[Timepoint=2]	24.79192b	6.41552	1	0.00590309	3.57652	46.0073
	[Injured=Cut]*[Timepoint=3]	24.24860b	6.0972	1	0.00383836	4.02268	44.4745
	[Injured=Cut]*[Timepoint=4]	22.77629b	6.25839	1	0.0133944	2.2185	43.3341
	[Injured=Cut]*[Timepoint=5]	28.66767b	6.0972	1	0.00016506	8.18502	49.1503
	[Injured=Intact]*[Timepoint=1]	26.47054b	6.41552	1	0.002167	5.07195	47.8691
	[Injured=Intact]*[Timepoint=2]	27.09212b	6.6692	1	0.00272142	4.93519	49.2491
	[Injured=Intact]*[Timepoint=3]	24.84861b	6.51818	1	0.00688674	3.40037	46.2969
	[Injured=Intact]*[Timepoint=4]	22.38577b	6.25839	1	0.0163401	1.90158	42.87
	[Injured=Intact]*[Timepoint=5]	28.62075b	6.0972	1	0.000168719	8.16465	49.0768
	[Injured=Intact]*[Timepoint=6]	-1.25534	6.41552	1	1	-14.286	11.7753
[Injured=Intact]*[Timepoint=1]	[Injured=Cut]*[Timepoint=1]	0.234116	7.28755	1	1	-14.13	14.5982
	[Injured=Cut]*[Timepoint=2]	-1.67862	6.3112	1	1	-14.6721	11.3149
	[Injured=Cut]*[Timepoint=3]	-2.22194	5.98733	1	1	-14.809	10.3652
	[Injured=Cut]*[Timepoint=4]	-3.69425	6.1514	1	1	-17.2622	9.87373
	[Injured=Cut]*[Timepoint=5]	2.19713	5.98733	1	1	-10.3794	14.7737
	[Injured=Cut]*[Timepoint=6]	-26.47054b	6.41552	1	0.002167	-47.8691	-5.07195
	[Injured=Intact]*[Timepoint=2]	0.621587	6.56891	1	1	-12.4721	13.7153
	[Injured=Intact]*[Timepoint=3]	-1.62193	6.41552	1	1	-14.7964	11.5526
	[Injured=Intact]*[Timepoint=4]	-4.08477	6.1514	1	1	-17.841	9.67149
	[Injured=Intact]*[Timepoint=5]	2.15021	5.98733	1	1	-10.4065	14.7069
	[Injured=Intact]*[Timepoint=6]	-27.72588b	6.3112	1	0.00069275	-48.872	-6.57975
[Injured=Intact]*[Timepoint=2]	[Injured=Cut]*[Timepoint=1]	-0.387472	7.51183	1	1	-15.2449	14.47
	[Injured=Cut]*[Timepoint=2]	-2.3002	6.56891	1	1	-16.0517	11.4513
	[Injured=Cut]*[Timepoint=3]	-2.84353	6.25839	1	1	-16.2269	10.5398
	[Injured=Cut]*[Timepoint=4]	-4.31584	6.41552	1	1	-18.69	10.0584
	[Injured=Cut]*[Timepoint=5]	1.57555	6.25839	1	1	-11.2736	14.4247
	[Injured=Cut]*[Timepoint=6]	-27.09212b	6.6692	1	0.00272142	-49.2491	-4.93519
	[Injured=Intact]*[Timepoint=1]	-0.621587	6.56891	1	1	-13.7153	12.4721
	[Injured=Intact]*[Timepoint=3]	-2.24352	6.6692	1	1	-16.1665	11.6795
	[Injured=Intact]*[Timepoint=4]	-4.70636	6.41552	1	1	-19.2746	9.86192
	[Injured=Intact]*[Timepoint=5]	1.52862	6.25839	1	1	-11.3019	14.3591
	[Injured=Intact]*[Timepoint=6]	-28.34746b	6.56891	1	0.000971809	-50.3274	-6.36748
[Injured=Intact]*[Timepoint=3]	[Injured=Cut]*[Timepoint=1]	1.85604	7.37808	1	1	-13.2914	17.0035
	[Injured=Cut]*[Timepoint=2]	-0.0566876	6.41552	1	1	-12.6503	12.5369
	[Injured=Cut]*[Timepoint=3]	-0.600012	6.0972	1	1	-12.7618	11.5618
	[Injured=Cut]*[Timepoint=4]	-2.07232	6.25839	1	1	-15.1239	10.9793
	[Injured=Cut]*[Timepoint=5]	3.81906	6.0972	1	1	-9.70461	17.3427
	[Injured=Cut]*[Timepoint=6]	-24.84861b	6.51818	1	0.00688674	-46.2969	-3.40037
	[Injured=Intact]*[Timepoint=1]	1.62193	6.41552	1	1	-11.5526	14.7964
	[Injured=Intact]*[Timepoint=2]	2.24352	6.6692	1	1	-11.6795	16.1665
	[Injured=Intact]*[Timepoint=4]	-2.46284	6.25839	1	1	-15.6798	10.7541
	[Injured=Intact]*[Timepoint=5]	3.77214	6.0972	1	1	-9.72901	17.2733
	[Injured=Intact]*[Timepoint=6]	-26.10395b	6.41552	1	0.00269275	-47.4498	-4.75813
[Injured=Intact]*[Timepoint=4]	[Injured=Cut]*[Timepoint=1]	4.31889	7.1496	1	1	-11.4628	20.1005
	[Injured=Cut]*[Timepoint=2]	2.40616	6.1514	1	1	-10.5786	15.3909
	[Injured=Cut]*[Timepoint=3]	1.86283	5.81864	1	1	-10.2452	13.9709
	[Injured=Cut]*[Timepoint=4]	0.390522	5.98733	1	1	-11.4806	12.2617
	[Injured=Cut]*[Timepoint=5]	6.2819	5.81864	1	1	-12.7276	25.2914
	[Injured=Cut]*[Timepoint=6]	-22.38577b	6.25839	1	0.0163401	-42.87	-1.90158
	[Injured=Intact]*[Timepoint=1]	4.08477	6.1514	1	1	-9.67149	17.841
	[Injured=Intact]*[Timepoint=2]	4.70636	6.41552	1	1	-9.86192	19.2746
	[Injured=Intact]*[Timepoint=3]	2.46284	6.25839	1	1	-10.7541	15.6798
	[Injured=Intact]*[Timepoint=5]	6.23498	5.81864	1	1	-8.03386	20.5038
	[Injured=Intact]*[Timepoint=6]	-23.64111b	6.1514	1	0.00631466	-43.9502	-3.33199
[Injured=Intact]*[Timepoint=5]	[Injured=Cut]*[Timepoint=1]	-1.91609	7.00894	1	1	-16.367	12.5348
	[Injured=Cut]*[Timepoint=2]	-3.82882	5.98733	1	1	-17.1467	9.48906
	[Injured=Cut]*[Timepoint=3]	-4.37215	5.64491	1	1	-17.3078	8.56351
	[Injured=Cut]*[Timepoint=4]	-5.84446	5.81864	1	1	-19.8933	8.20443
	[Injured=Cut]*[Timepoint=5]	0.0469246	5.64491	1	1	-11.033	11.1268
	[Injured=Cut]*[Timepoint=6]	-28.62075b	6.0972	1	0.000168719	-49.0768	-8.16465
	[Injured=Intact]*[Timepoint=1]	-2.15021	5.98733	1	1	-14.7069	10.4065
	[Injured=Intact]*[Timepoint=2]	-1.52862	6.25839	1	1	-14.3591	11.3019
	[Injured=Intact]*[Timepoint=3]	-3.77214	6.0972	1	1	-17.2733	9.72901
	[Injured=Intact]*[Timepoint=4]	-6.23498	5.81864	1	1	-20.5038	8.03386
	[Injured=Intact]*[Timepoint=6]	-29.87609b	5.98733	1	3.927e-05	-50.0153	-9.73689
[Injured=Intact]*[Timepoint=6]	[Injured=Cut]*[Timepoint=1]	27.95999b	7.28755	1	0.00636011	3.93956	51.9804
	[Injured=Cut]*[Timepoint=2]	26.04726b	6.3112	1	0.002167	4.98798	47.1065
	[Injured=Cut]*[Timepoint=3]	25.50394b	5.98733	1	0.00122848	5.4974	45.5105
	[Injured=Cut]*[Timepoint=4]	24.03163b	6.1514	1	0.00505264	3.65748	44.4058
	[Injured=Cut]*[Timepoint=5]	29.92301b	5.98733	1	3.82876e-05	9.7586	50.0874
	[Injured=Cut]*[Timepoint=6]	1.25534	6.41552	1	1	-11.7753	14.286
	[Injured=Intact]*[Timepoint=1]	27.72588b	6.3112	1	0.00069275	6.57975	48.872
	[Injured=Intact]*[Timepoint=2]	28.34746b	6.56891	1	0.000971809	6.36748	50.3274
	[Injured=Intact]*[Timepoint=3]	26.10395b	6.41552	1	0.00269275	4.75813	47.4498
	[Injured=Intact]*[Timepoint=4]	23.64111b	6.1514	1	0.00631466	3.33199	43.9502
	[Injured=Intact]*[Timepoint=5]	29.87609b	5.98733	1	3.927e-05	9.73689	50.0153
Pairwise comparisons of estimated marginal means based on the original scale of dependent variable HSP70
a. Confidence interval bounds are approximate.
b. The mean difference is significant at the .05 level.
Overall Test Results
Wald Chi-Square	df	Sig.
59.2501	11	1.27742e-08
The Wald chi-square tests the effect of Injured*Timepoint. This test is based on the linearly independent pairwise comparisons among the estimated marginal means.
Estimated Marginal Means 6: Temperature* Timepoint
Estimates
Temperature		Mean	Std. Error	95% Wald Confidence Interval
				Lower	Upper
Control	1	1.53544	4.82026	-7.91209	10.983
	2	5.11416	4.46269	-3.63256	13.8609
	3	2.74713	3.99155	-5.07617	10.5704
	4	10.2169	4.46269	1.47016	18.9636
	5	0.293903	3.99155	-7.5294	8.1172
	6	58.8642	4.82026	49.4167	68.3118
Heated	1	2.96061	5.46566	-7.75189	13.6731
	2	0.673033	4.82026	-8.7745	10.1206
	3	5.8269	4.60905	-3.20667	14.8605
	4	2.2923	3.99155	-5.531	10.1156
	5	0.0889166	3.99155	-7.73438	7.91222
	6	0.0623522	4.23368	-8.23551	8.36022
Pairwise Comparisons
(I) Temperature*Timepoint		Mean Difference (I-J)	Std. Error	df	Sequential Bonferroni Sig.	95% Wald Confidence Interval for Differencea
						Lower	Upper
[Temperature=Control]*[Timepoint=1]	[Temperature=Control]*[Timepoint=2]	-3.57872	6.56891	1	1	-17.8956	10.7382
	[Temperature=Control]*[Timepoint=3]	-1.21169	6.25839	1	1	-13.9182	11.4948
	[Temperature=Control]*[Timepoint=4]	-8.68144	6.56891	1	1	-25.7623	8.39947
	[Temperature=Control]*[Timepoint=5]	1.24154	6.25839	1	1	-11.4765	13.9596
	[Temperature=Control]*[Timepoint=6]	-57.32878b	6.81687	1	0	-80.287	-34.3706
	[Temperature=Heated]*[Timepoint=1]	-1.42517	7.28755	1	1	-16.2267	13.3764
	[Temperature=Heated]*[Timepoint=2]	0.862406	6.81687	1	1	-12.8052	14.53
	[Temperature=Heated]*[Timepoint=3]	-4.29146	6.6692	1	1	-19.1389	10.556
	[Temperature=Heated]*[Timepoint=4]	-0.756864	6.25839	1	1	-13.2918	11.7781
	[Temperature=Heated]*[Timepoint=5]	1.44652	6.25839	1	1	-11.3515	14.2446
	[Temperature=Heated]*[Timepoint=6]	1.47309	6.41552	1	1	-11.6424	14.5886
[Temperature=Control]*[Timepoint=2]	[Temperature=Control]*[Timepoint=1]	3.57872	6.56891	1	1	-10.7382	17.8956
	[Temperature=Control]*[Timepoint=3]	2.36702	5.98733	1	1	-10.2822	15.0162
	[Temperature=Control]*[Timepoint=4]	-5.10272	6.3112	1	1	-19.6757	9.47029
	[Temperature=Control]*[Timepoint=5]	4.82025	5.98733	1	1	-8.99424	18.6347
	[Temperature=Control]*[Timepoint=6]	-53.75007b	6.56891	1	1.96509e-14	-75.6693	-31.8309
	[Temperature=Heated]*[Timepoint=1]	2.15355	7.05614	1	1	-12.4861	16.7932
	[Temperature=Heated]*[Timepoint=2]	4.44112	6.56891	1	1	-10.2876	19.1698
	[Temperature=Heated]*[Timepoint=3]	-0.71274	6.41552	1	1	-13.5392	12.1138
	[Temperature=Heated]*[Timepoint=4]	2.82185	5.98733	1	1	-10.0271	15.6708
	[Temperature=Heated]*[Timepoint=5]	5.02524	5.98733	1	1	-8.89611	18.9466
	[Temperature=Heated]*[Timepoint=6]	5.0518	6.1514	1	1	-9.19291	19.2965
[Temperature=Control]*[Timepoint=3]	[Temperature=Control]*[Timepoint=1]	1.21169	6.25839	1	1	-11.4948	13.9182
	[Temperature=Control]*[Timepoint=2]	-2.36702	5.98733	1	1	-15.0162	10.2822
	[Temperature=Control]*[Timepoint=4]	-7.46974	5.98733	1	1	-22.7693	7.8298
	[Temperature=Control]*[Timepoint=5]	2.45323	5.64491	1	1	-9.56897	14.4754
	[Temperature=Control]*[Timepoint=6]	-56.11709b	6.25839	1	0	-77.168	-35.0662
	[Temperature=Heated]*[Timepoint=1]	-0.213473	6.76801	1	1	-13.5522	13.1252
	[Temperature=Heated]*[Timepoint=2]	2.0741	6.25839	1	1	-10.9783	15.1265
	[Temperature=Heated]*[Timepoint=3]	-3.07976	6.0972	1	1	-16.2575	10.098
	[Temperature=Heated]*[Timepoint=4]	0.45483	5.64491	1	1	-10.7684	11.6781
	[Temperature=Heated]*[Timepoint=5]	2.65822	5.64491	1	1	-9.45488	14.7713
	[Temperature=Heated]*[Timepoint=6]	2.68478	5.81864	1	1	-9.77645	15.146
[Temperature=Control]*[Timepoint=4]	[Temperature=Control]*[Timepoint=1]	8.68144	6.56891	1	1	-8.39947	25.7623
	[Temperature=Control]*[Timepoint=2]	5.10272	6.3112	1	1	-9.47029	19.6757
	[Temperature=Control]*[Timepoint=3]	7.46974	5.98733	1	1	-7.8298	22.7693
	[Temperature=Control]*[Timepoint=5]	9.92297	5.98733	1	1	-6.93336	26.7793
	[Temperature=Control]*[Timepoint=6]	-48.64734b	6.56891	1	7.30527e-12	-70.4711	-26.8236
	[Temperature=Heated]*[Timepoint=1]	7.25627	7.05614	1	1	-9.87491	24.3875
	[Temperature=Heated]*[Timepoint=2]	9.54384	6.56891	1	1	-8.07562	27.1633
	[Temperature=Heated]*[Timepoint=3]	4.38998	6.41552	1	1	-10.0207	18.8006
	[Temperature=Heated]*[Timepoint=4]	7.92457	5.98733	1	1	-7.65129	23.5004
	[Temperature=Heated]*[Timepoint=5]	10.128	5.98733	1	1	-9.73349	29.9894
	[Temperature=Heated]*[Timepoint=6]	10.1545	6.1514	1	1	-7.13684	27.4459
[Temperature=Control]*[Timepoint=5]	[Temperature=Control]*[Timepoint=1]	-1.24154	6.25839	1	1	-13.9596	11.4765
	[Temperature=Control]*[Timepoint=2]	-4.82025	5.98733	1	1	-18.6347	8.99424
	[Temperature=Control]*[Timepoint=3]	-2.45323	5.64491	1	1	-14.4754	9.56897
	[Temperature=Control]*[Timepoint=4]	-9.92297	5.98733	1	1	-26.7793	6.93336
	[Temperature=Control]*[Timepoint=6]	-58.57032b	6.25839	1	0	-79.5945	-37.5462
	[Temperature=Heated]*[Timepoint=1]	-2.6667	6.76801	1	1	-16.9614	11.628
	[Temperature=Heated]*[Timepoint=2]	-0.37913	6.25839	1	1	-12.7774	12.0191
	[Temperature=Heated]*[Timepoint=3]	-5.53299	6.0972	1	1	-19.9307	8.86469
	[Temperature=Heated]*[Timepoint=4]	-1.9984	5.64491	1	1	-13.8248	9.82798
	[Temperature=Heated]*[Timepoint=5]	0.204986	5.64491	1	1	-10.9296	11.3396
	[Temperature=Heated]*[Timepoint=6]	0.23155	5.81864	1	1	-11.2529	11.716
[Temperature=Control]*[Timepoint=6]	[Temperature=Control]*[Timepoint=1]	57.32878b	6.81687	1	0	34.3706	80.287
	[Temperature=Control]*[Timepoint=2]	53.75007b	6.56891	1	1.96509e-14	31.8309	75.6693
	[Temperature=Control]*[Timepoint=3]	56.11709b	6.25839	1	0	35.0662	77.168
	[Temperature=Control]*[Timepoint=4]	48.64734b	6.56891	1	7.30527e-12	26.8236	70.4711
	[Temperature=Control]*[Timepoint=5]	58.57032b	6.25839	1	0	37.5462	79.5945
	[Temperature=Heated]*[Timepoint=1]	55.90362b	7.28755	1	9.74554e-13	31.6564	80.1508
	[Temperature=Heated]*[Timepoint=2]	58.19119b	6.81687	1	0	35.3206	81.0618
	[Temperature=Heated]*[Timepoint=3]	53.03733b	6.6692	1	1.03029e-13	30.8152	75.2595
	[Temperature=Heated]*[Timepoint=4]	56.57192b	6.25839	1	0	35.6028	77.5411
	[Temperature=Heated]*[Timepoint=5]	58.77531b	6.25839	1	0	37.8343	79.7163
	[Temperature=Heated]*[Timepoint=6]	58.80187b	6.41552	1	0	37.3645	80.2392
[Temperature=Heated]*[Timepoint=1]	[Temperature=Control]*[Timepoint=1]	1.42517	7.28755	1	1	-13.3764	16.2267
	[Temperature=Control]*[Timepoint=2]	-2.15355	7.05614	1	1	-16.7932	12.4861
	[Temperature=Control]*[Timepoint=3]	0.213473	6.76801	1	1	-13.1252	13.5522
	[Temperature=Control]*[Timepoint=4]	-7.25627	7.05614	1	1	-24.3875	9.87491
	[Temperature=Control]*[Timepoint=5]	2.6667	6.76801	1	1	-11.628	16.9614
	[Temperature=Control]*[Timepoint=6]	-55.90362b	7.28755	1	9.74554e-13	-80.1508	-31.6564
	[Temperature=Heated]*[Timepoint=2]	2.28757	7.28755	1	1	-12.8583	17.4334
	[Temperature=Heated]*[Timepoint=3]	-2.86629	7.1496	1	1	-17.9881	12.2556
	[Temperature=Heated]*[Timepoint=4]	0.668303	6.76801	1	1	-12.8324	14.169
	[Temperature=Heated]*[Timepoint=5]	2.87169	6.76801	1	1	-11.5119	17.2553
	[Temperature=Heated]*[Timepoint=6]	2.89825	6.91357	1	1	-11.7793	17.5758
[Temperature=Heated]*[Timepoint=2]	[Temperature=Control]*[Timepoint=1]	-0.862406	6.81687	1	1	-14.53	12.8052
	[Temperature=Control]*[Timepoint=2]	-4.44112	6.56891	1	1	-19.1698	10.2876
	[Temperature=Control]*[Timepoint=3]	-2.0741	6.25839	1	1	-15.1265	10.9783
	[Temperature=Control]*[Timepoint=4]	-9.54384	6.56891	1	1	-27.1633	8.07562
	[Temperature=Control]*[Timepoint=5]	0.37913	6.25839	1	1	-12.0191	12.7774
	[Temperature=Control]*[Timepoint=6]	-58.19119b	6.81687	1	0	-81.0618	-35.3206
	[Temperature=Heated]*[Timepoint=1]	-2.28757	7.28755	1	1	-17.4334	12.8583
	[Temperature=Heated]*[Timepoint=3]	-5.15386	6.6692	1	1	-20.4308	10.1231
	[Temperature=Heated]*[Timepoint=4]	-1.61927	6.25839	1	1	-14.4859	11.2474
	[Temperature=Heated]*[Timepoint=5]	0.584116	6.25839	1	1	-11.8877	13.0559
	[Temperature=Heated]*[Timepoint=6]	0.610681	6.41552	1	1	-12.1786	13.3999
[Temperature=Heated]*[Timepoint=3]	[Temperature=Control]*[Timepoint=1]	4.29146	6.6692	1	1	-10.556	19.1389
	[Temperature=Control]*[Timepoint=2]	0.71274	6.41552	1	1	-12.1138	13.5392
	[Temperature=Control]*[Timepoint=3]	3.07976	6.0972	1	1	-10.098	16.2575
	[Temperature=Control]*[Timepoint=4]	-4.38998	6.41552	1	1	-18.8006	10.0207
	[Temperature=Control]*[Timepoint=5]	5.53299	6.0972	1	1	-8.86469	19.9307
	[Temperature=Control]*[Timepoint=6]	-53.03733b	6.6692	1	1.03029e-13	-75.2595	-30.8152
	[Temperature=Heated]*[Timepoint=1]	2.86629	7.1496	1	1	-12.2556	17.9881
	[Temperature=Heated]*[Timepoint=2]	5.15386	6.6692	1	1	-10.1231	20.4308
	[Temperature=Heated]*[Timepoint=4]	3.53459	6.0972	1	1	-9.85369	16.9229
	[Temperature=Heated]*[Timepoint=5]	5.73798	6.0972	1	1	-8.7707	20.2467
	[Temperature=Heated]*[Timepoint=6]	5.76454	6.25839	1	1	-9.05977	20.5889
[Temperature=Heated]*[Timepoint=4]	[Temperature=Control]*[Timepoint=1]	0.756864	6.25839	1	1	-11.7781	13.2918
	[Temperature=Control]*[Timepoint=2]	-2.82185	5.98733	1	1	-15.6708	10.0271
	[Temperature=Control]*[Timepoint=3]	-0.45483	5.64491	1	1	-11.6781	10.7684
	[Temperature=Control]*[Timepoint=4]	-7.92457	5.98733	1	1	-23.5004	7.65129
	[Temperature=Control]*[Timepoint=5]	1.9984	5.64491	1	1	-9.82798	13.8248
	[Temperature=Control]*[Timepoint=6]	-56.57192b	6.25839	1	0	-77.5411	-35.6028
	[Temperature=Heated]*[Timepoint=1]	-0.668303	6.76801	1	1	-14.169	12.8324
	[Temperature=Heated]*[Timepoint=2]	1.61927	6.25839	1	1	-11.2474	14.4859
	[Temperature=Heated]*[Timepoint=3]	-3.53459	6.0972	1	1	-16.9229	9.85369
	[Temperature=Heated]*[Timepoint=5]	2.20339	5.64491	1	1	-9.71024	14.117
	[Temperature=Heated]*[Timepoint=6]	2.22995	5.81864	1	1	-10.0326	14.4925
[Temperature=Heated]*[Timepoint=5]	[Temperature=Control]*[Timepoint=1]	-1.44652	6.25839	1	1	-14.2446	11.3515
	[Temperature=Control]*[Timepoint=2]	-5.02524	5.98733	1	1	-18.9466	8.89611
	[Temperature=Control]*[Timepoint=3]	-2.65822	5.64491	1	1	-14.7713	9.45488
	[Temperature=Control]*[Timepoint=4]	-10.128	5.98733	1	1	-29.9894	9.73349
	[Temperature=Control]*[Timepoint=5]	-0.204986	5.64491	1	1	-11.3396	10.9296
	[Temperature=Control]*[Timepoint=6]	-58.77531b	6.25839	1	0	-79.7163	-37.8343
	[Temperature=Heated]*[Timepoint=1]	-2.87169	6.76801	1	1	-17.2553	11.5119
	[Temperature=Heated]*[Timepoint=2]	-0.584116	6.25839	1	1	-13.0559	11.8877
	[Temperature=Heated]*[Timepoint=3]	-5.73798	6.0972	1	1	-20.2467	8.7707
	[Temperature=Heated]*[Timepoint=4]	-2.20339	5.64491	1	1	-14.117	9.71024
	[Temperature=Heated]*[Timepoint=6]	0.0265644	5.81864	1	1	-11.3868	11.44
[Temperature=Heated]*[Timepoint=6]	[Temperature=Control]*[Timepoint=1]	-1.47309	6.41552	1	1	-14.5886	11.6424
	[Temperature=Control]*[Timepoint=2]	-5.0518	6.1514	1	1	-19.2965	9.19291
	[Temperature=Control]*[Timepoint=3]	-2.68478	5.81864	1	1	-15.146	9.77645
	[Temperature=Control]*[Timepoint=4]	-10.1545	6.1514	1	1	-27.4459	7.13684
	[Temperature=Control]*[Timepoint=5]	-0.23155	5.81864	1	1	-11.716	11.2529
	[Temperature=Control]*[Timepoint=6]	-58.80187b	6.41552	1	0	-80.2392	-37.3645
	[Temperature=Heated]*[Timepoint=1]	-2.89825	6.91357	1	1	-17.5758	11.7793
	[Temperature=Heated]*[Timepoint=2]	-0.610681	6.41552	1	1	-13.3999	12.1786
	[Temperature=Heated]*[Timepoint=3]	-5.76454	6.25839	1	1	-20.5889	9.05977
	[Temperature=Heated]*[Timepoint=4]	-2.22995	5.81864	1	1	-14.4925	10.0326
	[Temperature=Heated]*[Timepoint=5]	-0.0265644	5.81864	1	1	-11.44	11.3868
Pairwise comparisons of estimated marginal means based on the original scale of dependent variable HSP70
a. Confidence interval bounds are approximate.
b. The mean difference is significant at the .05 level.
Overall Test Results
Wald Chi-Square	df	Sig.
131.052	11	0
The Wald chi-square tests the effect of Temperature*Timepoint. This test is based on the linearly independent pairwise comparisons among the estimated marginal means.
Estimated Marginal Means 7: Temperature* Injured* Timepoint
Estimates
Temperature			Mean	Std. Error	95% Wald Confidence Interval
					Lower	Upper
Control	Cut	1	2.08293	7.28755	-12.2004	16.3663
		2	7.08737	6.3112	-5.28236	19.4571
		3	3.58061	5.64491	-7.48321	14.6444
		4	10.6074	6.3112	-1.76233	22.9771
		5	0.241868	5.64491	-10.8219	11.3057
		6	57.6098	7.28755	43.3265	71.8932
	Intact	1	0.987949	6.3112	-11.3818	13.3577
		2	3.14094	6.3112	-9.22878	15.5107
		3	1.91366	5.64491	-9.15016	12.9775
		4	9.82636	6.3112	-2.54336	22.1961
		5	0.345937	5.64491	-10.7179	11.4098
		6	60.1186	6.3112	47.7489	72.4883
Heated	Cut	1	2.179	8.92538	-15.3144	19.6724
		2	1.00002	6.3112	-11.3697	13.3697
		3	5.59343	5.64491	-5.47039	16.6572
		4	1.51127	5.64491	-9.55255	12.5751
		5	0.0940261	5.64491	-10.9698	11.1578
		6	0.0613852	5.64491	-11.0024	11.1252
	Intact	1	3.74221	6.3112	-8.62751	16.1119
		2	0.346041	7.28755	-13.9373	14.6294
		3	6.06036	7.28755	-8.22297	20.3437
		4	3.07334	5.64491	-7.99048	14.1372
		5	0.083807	5.64491	-10.98	11.1476
		6	0.0633191	6.3112	-12.3064	12.433
Pairwise Comparisons
(I) Temperature*Injured*Timepoint		Mean Difference (I-J)	Std. Error	df	Sequential Bonferroni Sig.	95% Wald Confidence Interval for Differencea
						Lower	Upper
[Temperature=Control]*[Injured=Cut]*[Timepoint=1]	[Temperature=Control]*[Injured=Cut]*[Timepoint=2]	-5.00444	9.64052	1	1	-25.9018	15.8929
	[Temperature=Control]*[Injured=Cut]*[Timepoint=3]	-1.49768	9.2181	1	1	-20.1037	17.1084
	[Temperature=Control]*[Injured=Cut]*[Timepoint=4]	-8.52446	9.64052	1	1	-31.1692	14.1202
	[Temperature=Control]*[Injured=Cut]*[Timepoint=5]	1.84106	9.2181	1	1	-16.8964	20.5785
	[Temperature=Control]*[Injured=Cut]*[Timepoint=6]	-55.52692b	10.3061	1	1.70517e-05	-93.7383	-17.3155
	[Temperature=Control]*[Injured=Intact]*[Timepoint=1]	1.09498	9.64052	1	1	-18.188	20.378
	[Temperature=Control]*[Injured=Intact]*[Timepoint=2]	-1.05802	9.64052	1	1	-20.3274	18.2114
	[Temperature=Control]*[Injured=Intact]*[Timepoint=3]	0.169273	9.2181	1	1	-17.956	18.2945
	[Temperature=Control]*[Injured=Intact]*[Timepoint=4]	-7.74343	9.64052	1	1	-29.9776	14.4907
	[Temperature=Control]*[Injured=Intact]*[Timepoint=5]	1.73699	9.2181	1	1	-16.9603	20.4343
	[Temperature=Control]*[Injured=Intact]*[Timepoint=6]	-58.03567b	9.64052	1	4.41345e-07	-93.9179	-22.1534
	[Temperature=Heated]*[Injured=Cut]*[Timepoint=1]	-0.0960724	11.5226	1	1	-22.7129	22.5207
	[Temperature=Heated]*[Injured=Cut]*[Timepoint=2]	1.0829	9.64052	1	1	-18.1956	20.3614
	[Temperature=Heated]*[Injured=Cut]*[Timepoint=3]	-3.5105	9.2181	1	1	-22.9278	15.9068
	[Temperature=Heated]*[Injured=Cut]*[Timepoint=4]	0.571663	9.2181	1	1	-17.6946	18.838
	[Temperature=Heated]*[Injured=Cut]*[Timepoint=5]	1.9889	9.2181	1	1	-16.806	20.7838
	[Temperature=Heated]*[Injured=Cut]*[Timepoint=6]	2.02154	9.2181	1	1	-16.7861	20.8292
	[Temperature=Heated]*[Injured=Intact]*[Timepoint=1]	-1.65928	9.64052	1	1	-21.1533	17.8347
	[Temperature=Heated]*[Injured=Intact]*[Timepoint=2]	1.73689	10.3061	1	1	-19.089	22.5628
	[Temperature=Heated]*[Injured=Intact]*[Timepoint=3]	-3.97743	10.3061	1	1	-25.7092	17.7543
	[Temperature=Heated]*[Injured=Intact]*[Timepoint=4]	-0.990412	9.2181	1	1	-19.4077	17.4269
	[Temperature=Heated]*[Injured=Intact]*[Timepoint=5]	1.99912	9.2181	1	1	-16.7998	20.798
	[Temperature=Heated]*[Injured=Intact]*[Timepoint=6]	2.01961	9.64052	1	1	-17.613	21.6522
[Temperature=Control]*[Injured=Cut]*[Timepoint=2]	[Temperature=Control]*[Injured=Cut]*[Timepoint=1]	5.00444	9.64052	1	1	-15.8929	25.9018
	[Temperature=Control]*[Injured=Cut]*[Timepoint=3]	3.50676	8.46736	1	1	-14.4509	21.4644
	[Temperature=Control]*[Injured=Cut]*[Timepoint=4]	-3.52003	8.92538	1	1	-22.3727	15.3326
	[Temperature=Control]*[Injured=Cut]*[Timepoint=5]	6.8455	8.46736	1	1	-12.706	26.397
	[Temperature=Control]*[Injured=Cut]*[Timepoint=6]	-50.52248b	9.64052	1	3.79248e-05	-86.2455	-14.7995
	[Temperature=Control]*[Injured=Intact]*[Timepoint=1]	6.09942	8.92538	1	1	-13.945	26.1438
	[Temperature=Control]*[Injured=Intact]*[Timepoint=2]	3.94642	8.92538	1	1	-15.0921	22.9849
	[Temperature=Control]*[Injured=Intact]*[Timepoint=3]	5.17371	8.46736	1	1	-13.5447	23.8922
	[Temperature=Control]*[Injured=Intact]*[Timepoint=4]	-2.73899	8.92538	1	1	-21.263	15.785
	[Temperature=Control]*[Injured=Intact]*[Timepoint=5]	6.74143	8.46736	1	1	-12.7562	26.2391
	[Temperature=Control]*[Injured=Intact]*[Timepoint=6]	-53.03123b	8.92538	1	7.08377e-07	-86.2339	-19.8286
	[Temperature=Heated]*[Injured=Cut]*[Timepoint=1]	4.90837	10.9313	1	1	-18.4421	28.2588
	[Temperature=Heated]*[Injured=Cut]*[Timepoint=2]	6.08734	8.92538	1	1	-13.9511	26.1258
	[Temperature=Heated]*[Injured=Cut]*[Timepoint=3]	1.49394	8.46736	1	1	-15.6417	18.6296
	[Temperature=Heated]*[Injured=Cut]*[Timepoint=4]	5.5761	8.46736	1	1	-13.3366	24.4888
	[Temperature=Heated]*[Injured=Cut]*[Timepoint=5]	6.99334	8.46736	1	1	-12.6351	26.6217
	[Temperature=Heated]*[Injured=Cut]*[Timepoint=6]	7.02598	8.46736	1	1	-12.6195	26.6714
	[Temperature=Heated]*[Injured=Intact]*[Timepoint=1]	3.34516	8.92538	1	1	-15.4326	22.1229
	[Temperature=Heated]*[Injured=Intact]*[Timepoint=2]	6.74133	9.64052	1	1	-14.9849	28.4675
	[Temperature=Heated]*[Injured=Intact]*[Timepoint=3]	1.02701	9.64052	1	1	-18.2311	20.2851
	[Temperature=Heated]*[Injured=Intact]*[Timepoint=4]	4.01403	8.46736	1	1	-14.1676	22.1956
	[Temperature=Heated]*[Injured=Intact]*[Timepoint=5]	7.00356	8.46736	1	1	-12.6302	26.6373
	[Temperature=Heated]*[Injured=Intact]*[Timepoint=6]	7.02405	8.92538	1	1	-13.486	27.5341
[Temperature=Control]*[Injured=Cut]*[Timepoint=3]	[Temperature=Control]*[Injured=Cut]*[Timepoint=1]	1.49768	9.2181	1	1	-17.1084	20.1037
	[Temperature=Control]*[Injured=Cut]*[Timepoint=2]	-3.50676	8.46736	1	1	-21.4644	14.4509
	[Temperature=Control]*[Injured=Cut]*[Timepoint=4]	-7.02678	8.46736	1	1	-26.6727	12.6191
	[Temperature=Control]*[Injured=Cut]*[Timepoint=5]	3.33874	7.98311	1	1	-13.606	20.2835
	[Temperature=Control]*[Injured=Cut]*[Timepoint=6]	-54.02924b	9.2181	1	1.13496e-06	-88.2834	-19.7751
	[Temperature=Control]*[Injured=Intact]*[Timepoint=1]	2.59266	8.46736	1	1	-14.9784	20.1637
	[Temperature=Control]*[Injured=Intact]*[Timepoint=2]	0.439666	8.46736	1	1	-16.3087	17.1881
	[Temperature=Control]*[Injured=Intact]*[Timepoint=3]	1.66696	7.98311	1	1	-14.5883	17.9222
	[Temperature=Control]*[Injured=Intact]*[Timepoint=4]	-6.24575	8.46736	1	1	-25.4905	12.999
	[Temperature=Control]*[Injured=Intact]*[Timepoint=5]	3.23467	7.98311	1	1	-13.6649	20.1342
	[Temperature=Control]*[Injured=Intact]*[Timepoint=6]	-56.53798b	8.46736	1	6.50435e-09	-88.1687	-24.9073
	[Temperature=Heated]*[Injured=Cut]*[Timepoint=1]	1.40161	10.5607	1	1	-19.7965	22.5997
	[Temperature=Heated]*[Injured=Cut]*[Timepoint=2]	2.58059	8.46736	1	1	-14.9855	20.1467
	[Temperature=Heated]*[Injured=Cut]*[Timepoint=3]	-2.01282	7.98311	1	1	-18.4043	14.3786
	[Temperature=Heated]*[Injured=Cut]*[Timepoint=4]	2.06935	7.98311	1	1	-14.3447	18.4834
	[Temperature=Heated]*[Injured=Cut]*[Timepoint=5]	3.48659	7.98311	1	1	-13.5229	20.4961
	[Temperature=Heated]*[Injured=Cut]*[Timepoint=6]	3.51923	7.98311	1	1	-13.5047	20.5431
	[Temperature=Heated]*[Injured=Intact]*[Timepoint=1]	-0.161601	8.46736	1	1	-16.8128	16.4896
	[Temperature=Heated]*[Injured=Intact]*[Timepoint=2]	3.23457	9.2181	1	1	-16.0657	22.5348
	[Temperature=Heated]*[Injured=Intact]*[Timepoint=3]	-2.47975	9.2181	1	1	-21.4693	16.5098
	[Temperature=Heated]*[Injured=Intact]*[Timepoint=4]	0.507271	7.98311	1	1	-15.3161	16.3307
	[Temperature=Heated]*[Injured=Intact]*[Timepoint=5]	3.4968	7.98311	1	1	-13.5172	20.5108
	[Temperature=Heated]*[Injured=Intact]*[Timepoint=6]	3.51729	8.46736	1	1	-14.4449	21.4795
[Temperature=Control]*[Injured=Cut]*[Timepoint=4]	[Temperature=Control]*[Injured=Cut]*[Timepoint=1]	8.52446	9.64052	1	1	-14.1202	31.1692
	[Temperature=Control]*[Injured=Cut]*[Timepoint=2]	3.52003	8.92538	1	1	-15.3326	22.3727
	[Temperature=Control]*[Injured=Cut]*[Timepoint=3]	7.02678	8.46736	1	1	-12.6191	26.6727
	[Temperature=Control]*[Injured=Cut]*[Timepoint=5]	10.3655	8.46736	1	1	-11.1525	31.8836
	[Temperature=Control]*[Injured=Cut]*[Timepoint=6]	-47.00246b	9.64052	1	0.000253952	-82.6943	-11.3106
	[Temperature=Control]*[Injured=Intact]*[Timepoint=1]	9.61944	8.92538	1	1	-12.2995	31.5384
	[Temperature=Control]*[Injured=Intact]*[Timepoint=2]	7.46645	8.92538	1	1	-13.2733	28.2062
	[Temperature=Control]*[Injured=Intact]*[Timepoint=3]	8.69374	8.46736	1	1	-11.8559	29.2434
	[Temperature=Control]*[Injured=Intact]*[Timepoint=4]	0.781031	8.92538	1	1	-16.9868	18.5488
	[Temperature=Control]*[Injured=Intact]*[Timepoint=5]	10.2615	8.46736	1	1	-11.1946	31.7175
	[Temperature=Control]*[Injured=Intact]*[Timepoint=6]	-49.51120b	8.92538	1	6.96535e-06	-82.6127	-16.4097
	[Temperature=Heated]*[Injured=Cut]*[Timepoint=1]	8.42839	10.9313	1	1	-16.6019	33.4586
	[Temperature=Heated]*[Injured=Cut]*[Timepoint=2]	9.60737	8.92538	1	1	-12.3047	31.5195
	[Temperature=Heated]*[Injured=Cut]*[Timepoint=3]	5.01396	8.46736	1	1	-13.6285	23.6564
	[Temperature=Heated]*[Injured=Cut]*[Timepoint=4]	9.09613	8.46736	1	1	-11.6811	29.8734
	[Temperature=Heated]*[Injured=Cut]*[Timepoint=5]	10.5134	8.46736	1	1	-11.0932	32.1199
	[Temperature=Heated]*[Injured=Cut]*[Timepoint=6]	10.546	8.46736	1	1	-20.7841	41.8761
	[Temperature=Heated]*[Injured=Intact]*[Timepoint=1]	6.86518	8.92538	1	1	-13.5635	27.2938
	[Temperature=Heated]*[Injured=Intact]*[Timepoint=2]	10.2614	9.64052	1	1	-13.3405	33.8632
	[Temperature=Heated]*[Injured=Intact]*[Timepoint=3]	4.54703	9.64052	1	1	-16.1433	25.2373
	[Temperature=Heated]*[Injured=Intact]*[Timepoint=4]	7.53405	8.46736	1	1	-12.3801	27.4482
	[Temperature=Heated]*[Injured=Intact]*[Timepoint=5]	10.5236	8.46736	1	1	-11.0891	32.1362
	[Temperature=Heated]*[Injured=Intact]*[Timepoint=6]	10.5441	8.92538	1	1	-11.9113	32.9994
[Temperature=Control]*[Injured=Cut]*[Timepoint=5]	[Temperature=Control]*[Injured=Cut]*[Timepoint=1]	-1.84106	9.2181	1	1	-20.5785	16.8964
	[Temperature=Control]*[Injured=Cut]*[Timepoint=2]	-6.8455	8.46736	1	1	-26.397	12.706
	[Temperature=Control]*[Injured=Cut]*[Timepoint=3]	-3.33874	7.98311	1	1	-20.2835	13.606
	[Temperature=Control]*[Injured=Cut]*[Timepoint=4]	-10.3655	8.46736	1	1	-31.8836	11.1525
	[Temperature=Control]*[Injured=Cut]*[Timepoint=6]	-57.36798b	9.2181	1	1.25509e-07	-91.7235	-23.0124
	[Temperature=Control]*[Injured=Intact]*[Timepoint=1]	-0.746081	8.46736	1	1	-17.6039	16.1118
	[Temperature=Control]*[Injured=Intact]*[Timepoint=2]	-2.89908	8.46736	1	1	-20.5972	14.7991
	[Temperature=Control]*[Injured=Intact]*[Timepoint=3]	-1.67179	7.98311	1	1	-17.9289	14.5853
	[Temperature=Control]*[Injured=Intact]*[Timepoint=4]	-9.58449	8.46736	1	1	-30.6427	11.4737
	[Temperature=Control]*[Injured=Intact]*[Timepoint=5]	-0.104068	7.98311	1	1	-15.7863	15.5782
	[Temperature=Control]*[Injured=Intact]*[Timepoint=6]	-59.87673b	8.46736	1	4.18508e-10	-91.5548	-28.1987
	[Temperature=Heated]*[Injured=Cut]*[Timepoint=1]	-1.93713	10.5607	1	1	-23.3373	19.4631
	[Temperature=Heated]*[Injured=Cut]*[Timepoint=2]	-0.758156	8.46736	1	1	-17.6204	16.1041
	[Temperature=Heated]*[Injured=Cut]*[Timepoint=3]	-5.35156	7.98311	1	1	-23.2287	12.5256
	[Temperature=Heated]*[Injured=Cut]*[Timepoint=4]	-1.2694	7.98311	1	1	-17.3723	14.8335
	[Temperature=Heated]*[Injured=Cut]*[Timepoint=5]	0.147842	7.98311	1	1	-15.5495	15.8452
	[Temperature=Heated]*[Injured=Cut]*[Timepoint=6]	0.180483	7.98311	1	1	-15.5282	15.8891
	[Temperature=Heated]*[Injured=Intact]*[Timepoint=1]	-3.50034	8.46736	1	1	-21.4552	14.4545
	[Temperature=Heated]*[Injured=Intact]*[Timepoint=2]	-0.104173	9.2181	1	1	-18.207	17.9987
	[Temperature=Heated]*[Injured=Intact]*[Timepoint=3]	-5.81849	9.2181	1	1	-26.2858	14.6489
	[Temperature=Heated]*[Injured=Intact]*[Timepoint=4]	-2.83147	7.98311	1	1	-19.5587	13.8958
	[Temperature=Heated]*[Injured=Intact]*[Timepoint=5]	0.158061	7.98311	1	1	-15.5428	15.859
	[Temperature=Heated]*[Injured=Intact]*[Timepoint=6]	0.178549	8.46736	1	1	-16.4785	16.8356
[Temperature=Control]*[Injured=Cut]*[Timepoint=6]	[Temperature=Control]*[Injured=Cut]*[Timepoint=1]	55.52692b	10.3061	1	1.70517e-05	17.3155	93.7383
	[Temperature=Control]*[Injured=Cut]*[Timepoint=2]	50.52248b	9.64052	1	3.79248e-05	14.7995	86.2455
	[Temperature=Control]*[Injured=Cut]*[Timepoint=3]	54.02924b	9.2181	1	1.13496e-06	19.7751	88.2834
	[Temperature=Control]*[Injured=Cut]*[Timepoint=4]	47.00246b	9.64052	1	0.000253952	11.3106	82.6943
	[Temperature=Control]*[Injured=Cut]*[Timepoint=5]	57.36798b	9.2181	1	1.25509e-07	23.0124	91.7235
	[Temperature=Control]*[Injured=Intact]*[Timepoint=1]	56.62190b	9.64052	1	1.06357e-06	20.7784	92.4654
	[Temperature=Control]*[Injured=Intact]*[Timepoint=2]	54.46890b	9.64052	1	3.94706e-06	18.655	90.2828
	[Temperature=Control]*[Injured=Intact]*[Timepoint=3]	55.69619b	9.2181	1	3.8651e-07	21.377	90.0154
	[Temperature=Control]*[Injured=Intact]*[Timepoint=4]	47.78349b	9.64052	1	0.000168646	12.0812	83.4858
	[Temperature=Control]*[Injured=Intact]*[Timepoint=5]	57.26391b	9.2181	1	1.34347e-07	22.9174	91.6104
	[Temperature=Control]*[Injured=Intact]*[Timepoint=6]	-2.50875	9.64052	1	1	-22.3345	17.317
	[Temperature=Heated]*[Injured=Cut]*[Timepoint=1]	55.43085b	11.5226	1	0.000350595	12.7835	98.0782
	[Temperature=Heated]*[Injured=Cut]*[Timepoint=2]	56.60982b	9.64052	1	1.06734e-06	20.7761	92.4435
	[Temperature=Heated]*[Injured=Cut]*[Timepoint=3]	52.01642b	9.2181	1	4.09762e-06	17.7812	86.2516
	[Temperature=Heated]*[Injured=Cut]*[Timepoint=4]	56.09858b	9.2181	1	2.95756e-07	21.7702	90.4269
	[Temperature=Heated]*[Injured=Cut]*[Timepoint=5]	57.51582b	9.2181	1	1.13733e-07	23.1513	91.8804
	[Temperature=Heated]*[Injured=Cut]*[Timepoint=6]	57.54846b	9.2181	1	1.12045e-07	23.1661	91.9309
	[Temperature=Heated]*[Injured=Intact]*[Timepoint=1]	53.86764b	9.64052	1	5.5706e-06	18.0937	89.6416
	[Temperature=Heated]*[Injured=Intact]*[Timepoint=2]	57.26381b	10.3061	1	6.64169e-06	19.0306	95.497
	[Temperature=Heated]*[Injured=Intact]*[Timepoint=3]	51.54949b	10.3061	1	0.000134028	13.3711	89.7279
	[Temperature=Heated]*[Injured=Intact]*[Timepoint=4]	54.53651b	9.2181	1	8.23444e-07	20.2543	88.8188
	[Temperature=Heated]*[Injured=Intact]*[Timepoint=5]	57.52604b	9.2181	1	1.13366e-07	23.1526	91.8995
	[Temperature=Heated]*[Injured=Intact]*[Timepoint=6]	57.54653b	9.64052	1	6.00682e-07	21.6739	93.4192
[Temperature=Control]*[Injured=Intact]*[Timepoint=1]	[Temperature=Control]*[Injured=Cut]*[Timepoint=1]	-1.09498	9.64052	1	1	-20.378	18.188
	[Temperature=Control]*[Injured=Cut]*[Timepoint=2]	-6.09942	8.92538	1	1	-26.1438	13.945
	[Temperature=Control]*[Injured=Cut]*[Timepoint=3]	-2.59266	8.46736	1	1	-20.1637	14.9784
	[Temperature=Control]*[Injured=Cut]*[Timepoint=4]	-9.61944	8.92538	1	1	-31.5384	12.2995
	[Temperature=Control]*[Injured=Cut]*[Timepoint=5]	0.746081	8.46736	1	1	-16.1118	17.6039
	[Temperature=Control]*[Injured=Cut]*[Timepoint=6]	-56.62190b	9.64052	1	1.06357e-06	-92.4654	-20.7784
	[Temperature=Control]*[Injured=Intact]*[Timepoint=2]	-2.153	8.92538	1	1	-20.4405	16.1345
	[Temperature=Control]*[Injured=Intact]*[Timepoint=3]	-0.925706	8.46736	1	1	-17.8489	15.9975
	[Temperature=Control]*[Injured=Intact]*[Timepoint=4]	-8.83841	8.92538	1	1	-30.3181	12.6413
	[Temperature=Control]*[Injured=Intact]*[Timepoint=5]	0.642013	8.46736	1	1	-16.1784	17.4624
	[Temperature=Control]*[Injured=Intact]*[Timepoint=6]	-59.13065b	8.92538	1	9.23697e-09	-92.4639	-25.7974
	[Temperature=Heated]*[Injured=Cut]*[Timepoint=1]	-1.19105	10.9313	1	1	-23.0374	20.6553
	[Temperature=Heated]*[Injured=Cut]*[Timepoint=2]	-0.0120751	8.92538	1	1	-17.5096	17.4855
	[Temperature=Heated]*[Injured=Cut]*[Timepoint=3]	-4.60548	8.46736	1	1	-23.0566	13.8456
	[Temperature=Heated]*[Injured=Cut]*[Timepoint=4]	-0.523316	8.46736	1	1	-17.3013	16.2547
	[Temperature=Heated]*[Injured=Cut]*[Timepoint=5]	0.893923	8.46736	1	1	-16.0177	17.8055
	[Temperature=Heated]*[Injured=Cut]*[Timepoint=6]	0.926564	8.46736	1	1	-15.997	17.8501
	[Temperature=Heated]*[Injured=Intact]*[Timepoint=1]	-2.75426	8.92538	1	1	-21.2845	15.776
	[Temperature=Heated]*[Injured=Intact]*[Timepoint=2]	0.641908	9.64052	1	1	-18.4771	19.7609
	[Temperature=Heated]*[Injured=Intact]*[Timepoint=3]	-5.07241	9.64052	1	1	-26.001	15.8562
	[Temperature=Heated]*[Injured=Intact]*[Timepoint=4]	-2.08539	8.46736	1	1	-19.4514	15.2806
	[Temperature=Heated]*[Injured=Intact]*[Timepoint=5]	0.904142	8.46736	1	1	-16.0112	17.8195
	[Temperature=Heated]*[Injured=Intact]*[Timepoint=6]	0.92463	8.92538	1	1	-16.8953	18.7446
[Temperature=Control]*[Injured=Intact]*[Timepoint=2]	[Temperature=Control]*[Injured=Cut]*[Timepoint=1]	1.05802	9.64052	1	1	-18.2114	20.3274
	[Temperature=Control]*[Injured=Cut]*[Timepoint=2]	-3.94642	8.92538	1	1	-22.9849	15.0921
	[Temperature=Control]*[Injured=Cut]*[Timepoint=3]	-0.439666	8.46736	1	1	-17.1881	16.3087
	[Temperature=Control]*[Injured=Cut]*[Timepoint=4]	-7.46645	8.92538	1	1	-28.2062	13.2733
	[Temperature=Control]*[Injured=Cut]*[Timepoint=5]	2.89908	8.46736	1	1	-14.7991	20.5972
	[Temperature=Control]*[Injured=Cut]*[Timepoint=6]	-54.46890b	9.64052	1	3.94706e-06	-90.2828	-18.655
	[Temperature=Control]*[Injured=Intact]*[Timepoint=1]	2.153	8.92538	1	1	-16.1345	20.4405
	[Temperature=Control]*[Injured=Intact]*[Timepoint=3]	1.22729	8.46736	1	1	-15.8076	18.2622
	[Temperature=Control]*[Injured=Intact]*[Timepoint=4]	-6.68542	8.92538	1	1	-27.0227	13.6518
	[Temperature=Control]*[Injured=Intact]*[Timepoint=5]	2.79501	8.46736	1	1	-14.8597	20.4497
	[Temperature=Control]*[Injured=Intact]*[Timepoint=6]	-56.97765b	8.92538	1	4.54397e-08	-90.2854	-23.6699
	[Temperature=Heated]*[Injured=Cut]*[Timepoint=1]	0.961944	10.9313	1	1	-20.801	22.7249
	[Temperature=Heated]*[Injured=Cut]*[Timepoint=2]	2.14092	8.92538	1	1	-16.1418	20.4236
	[Temperature=Heated]*[Injured=Cut]*[Timepoint=3]	-2.45249	8.46736	1	1	-19.9662	15.0612
	[Temperature=Heated]*[Injured=Cut]*[Timepoint=4]	1.62968	8.46736	1	1	-15.558	18.8174
	[Temperature=Heated]*[Injured=Cut]*[Timepoint=5]	3.04692	8.46736	1	1	-14.7135	20.8073
	[Temperature=Heated]*[Injured=Cut]*[Timepoint=6]	3.07956	8.46736	1	1	-14.6947	20.8538
	[Temperature=Heated]*[Injured=Intact]*[Timepoint=1]	-0.601267	8.92538	1	1	-18.3045	17.102
	[Temperature=Heated]*[Injured=Intact]*[Timepoint=2]	2.7949	9.64052	1	1	-17.1464	22.7362
	[Temperature=Heated]*[Injured=Intact]*[Timepoint=3]	-2.91942	9.64052	1	1	-22.9116	17.0728
	[Temperature=Heated]*[Injured=Intact]*[Timepoint=4]	0.0676046	8.46736	1	1	-16.5513	16.6865
	[Temperature=Heated]*[Injured=Intact]*[Timepoint=5]	3.05714	8.46736	1	1	-14.7076	20.8219
	[Temperature=Heated]*[Injured=Intact]*[Timepoint=6]	3.07763	8.92538	1	1	-15.587	21.7422
[Temperature=Control]*[Injured=Intact]*[Timepoint=3]	[Temperature=Control]*[Injured=Cut]*[Timepoint=1]	-0.169273	9.2181	1	1	-18.2945	17.956
	[Temperature=Control]*[Injured=Cut]*[Timepoint=2]	-5.17371	8.46736	1	1	-23.8922	13.5447
	[Temperature=Control]*[Injured=Cut]*[Timepoint=3]	-1.66696	7.98311	1	1	-17.9222	14.5883
	[Temperature=Control]*[Injured=Cut]*[Timepoint=4]	-8.69374	8.46736	1	1	-29.2434	11.8559
	[Temperature=Control]*[Injured=Cut]*[Timepoint=5]	1.67179	7.98311	1	1	-14.5853	17.9289
	[Temperature=Control]*[Injured=Cut]*[Timepoint=6]	-55.69619b	9.2181	1	3.8651e-07	-90.0154	-21.377
	[Temperature=Control]*[Injured=Intact]*[Timepoint=1]	0.925706	8.46736	1	1	-15.9975	17.8489
	[Temperature=Control]*[Injured=Intact]*[Timepoint=2]	-1.22729	8.46736	1	1	-18.2622	15.8076
	[Temperature=Control]*[Injured=Intact]*[Timepoint=4]	-7.91271	8.46736	1	1	-28.031	12.2056
	[Temperature=Control]*[Injured=Intact]*[Timepoint=5]	1.56772	7.98311	1	1	-14.6491	17.7845
	[Temperature=Control]*[Injured=Intact]*[Timepoint=6]	-58.20494b	8.46736	1	1.6851e-09	-89.8594	-26.5504
	[Temperature=Heated]*[Injured=Cut]*[Timepoint=1]	-0.265346	10.5607	1	1	-21.0552	20.5245
	[Temperature=Heated]*[Injured=Cut]*[Timepoint=2]	0.913631	8.46736	1	1	-16.0052	17.8324
	[Temperature=Heated]*[Injured=Cut]*[Timepoint=3]	-3.67977	7.98311	1	1	-20.7748	13.4152
	[Temperature=Heated]*[Injured=Cut]*[Timepoint=4]	0.40239	7.98311	1	1	-15.3839	16.1886
	[Temperature=Heated]*[Injured=Cut]*[Timepoint=5]	1.81963	7.98311	1	1	-14.4953	18.1346
	[Temperature=Heated]*[Injured=Cut]*[Timepoint=6]	1.85227	7.98311	1	1	-14.4755	18.1801
	[Temperature=Heated]*[Injured=Intact]*[Timepoint=1]	-1.82856	8.46736	1	1	-19.0934	15.4363
	[Temperature=Heated]*[Injured=Intact]*[Timepoint=2]	1.56761	9.2181	1	1	-17.065	20.2002
	[Temperature=Heated]*[Injured=Intact]*[Timepoint=3]	-4.14671	9.2181	1	1	-23.8409	15.5475
	[Temperature=Heated]*[Injured=Intact]*[Timepoint=4]	-1.15969	7.98311	1	1	-17.2213	14.9019
	[Temperature=Heated]*[Injured=Intact]*[Timepoint=5]	1.82985	7.98311	1	1	-14.4891	18.1488
	[Temperature=Heated]*[Injured=Intact]*[Timepoint=6]	1.85034	8.46736	1	1	-15.423	19.1237
[Temperature=Control]*[Injured=Intact]*[Timepoint=4]	[Temperature=Control]*[Injured=Cut]*[Timepoint=1]	7.74343	9.64052	1	1	-14.4907	29.9776
	[Temperature=Control]*[Injured=Cut]*[Timepoint=2]	2.73899	8.92538	1	1	-15.785	21.263
	[Temperature=Control]*[Injured=Cut]*[Timepoint=3]	6.24575	8.46736	1	1	-12.999	25.4905
	[Temperature=Control]*[Injured=Cut]*[Timepoint=4]	-0.781031	8.92538	1	1	-18.5488	16.9868
	[Temperature=Control]*[Injured=Cut]*[Timepoint=5]	9.58449	8.46736	1	1	-11.4737	30.6427
	[Temperature=Control]*[Injured=Cut]*[Timepoint=6]	-47.78349b	9.64052	1	0.000168646	-83.4858	-12.0812
	[Temperature=Control]*[Injured=Intact]*[Timepoint=1]	8.83841	8.92538	1	1	-12.6413	30.3181
	[Temperature=Control]*[Injured=Intact]*[Timepoint=2]	6.68542	8.92538	1	1	-13.6518	27.0227
	[Temperature=Control]*[Injured=Intact]*[Timepoint=3]	7.91271	8.46736	1	1	-12.2056	28.031
	[Temperature=Control]*[Injured=Intact]*[Timepoint=5]	9.48043	8.46736	1	1	-11.5175	30.4783
	[Temperature=Control]*[Injured=Intact]*[Timepoint=6]	-50.29223b	8.92538	1	4.27784e-06	-83.4311	-17.1534
	[Temperature=Heated]*[Injured=Cut]*[Timepoint=1]	7.64736	10.9313	1	1	-16.9895	32.2843
	[Temperature=Heated]*[Injured=Cut]*[Timepoint=2]	8.82634	8.92538	1	1	-12.6467	30.2993
	[Temperature=Heated]*[Injured=Cut]*[Timepoint=3]	4.23293	8.46736	1	1	-14.0474	22.5132
	[Temperature=Heated]*[Injured=Cut]*[Timepoint=4]	8.3151	8.46736	1	1	-12.0237	28.6539
	[Temperature=Heated]*[Injured=Cut]*[Timepoint=5]	9.73234	8.46736	1	1	-11.4119	30.8766
	[Temperature=Heated]*[Injured=Cut]*[Timepoint=6]	9.76498	8.46736	1	1	-11.3983	30.9283
	[Temperature=Heated]*[Injured=Intact]*[Timepoint=1]	6.08415	8.92538	1	1	-13.9527	26.121
	[Temperature=Heated]*[Injured=Intact]*[Timepoint=2]	9.48032	9.64052	1	1	-13.6837	32.6444
	[Temperature=Heated]*[Injured=Intact]*[Timepoint=3]	3.766	9.64052	1	1	-16.5817	24.1137
	[Temperature=Heated]*[Injured=Intact]*[Timepoint=4]	6.75302	8.46736	1	1	-12.7506	26.2566
	[Temperature=Heated]*[Injured=Intact]*[Timepoint=5]	9.74255	8.46736	1	1	-11.4077	30.8928
	[Temperature=Heated]*[Injured=Intact]*[Timepoint=6]	9.76304	8.92538	1	1	-12.2381	31.7642
[Temperature=Control]*[Injured=Intact]*[Timepoint=5]	[Temperature=Control]*[Injured=Cut]*[Timepoint=1]	-1.73699	9.2181	1	1	-20.4343	16.9603
	[Temperature=Control]*[Injured=Cut]*[Timepoint=2]	-6.74143	8.46736	1	1	-26.2391	12.7562
	[Temperature=Control]*[Injured=Cut]*[Timepoint=3]	-3.23467	7.98311	1	1	-20.1342	13.6649
	[Temperature=Control]*[Injured=Cut]*[Timepoint=4]	-10.2615	8.46736	1	1	-31.7175	11.1946
	[Temperature=Control]*[Injured=Cut]*[Timepoint=5]	0.104068	7.98311	1	1	-15.5782	15.7863
	[Temperature=Control]*[Injured=Cut]*[Timepoint=6]	-57.26391b	9.2181	1	1.34347e-07	-91.6104	-22.9174
	[Temperature=Control]*[Injured=Intact]*[Timepoint=1]	-0.642013	8.46736	1	1	-17.4624	16.1784
	[Temperature=Control]*[Injured=Intact]*[Timepoint=2]	-2.79501	8.46736	1	1	-20.4497	14.8597
	[Temperature=Control]*[Injured=Intact]*[Timepoint=3]	-1.56772	7.98311	1	1	-17.7845	14.6491
	[Temperature=Control]*[Injured=Intact]*[Timepoint=4]	-9.48043	8.46736	1	1	-30.4783	11.5175
	[Temperature=Control]*[Injured=Intact]*[Timepoint=6]	-59.77266b	8.46736	1	4.55568e-10	-91.4429	-28.1024
	[Temperature=Heated]*[Injured=Cut]*[Timepoint=1]	-1.83306	10.5607	1	1	-23.1935	19.5274
	[Temperature=Heated]*[Injured=Cut]*[Timepoint=2]	-0.654088	8.46736	1	1	-17.4788	16.1706
	[Temperature=Heated]*[Injured=Cut]*[Timepoint=3]	-5.24749	7.98311	1	1	-23.0738	12.5788
	[Temperature=Heated]*[Injured=Cut]*[Timepoint=4]	-1.16533	7.98311	1	1	-17.2291	14.8984
	[Temperature=Heated]*[Injured=Cut]*[Timepoint=5]	0.251911	7.98311	1	1	-15.4816	15.9854
	[Temperature=Heated]*[Injured=Cut]*[Timepoint=6]	0.284552	7.98311	1	1	-15.4603	16.0294
	[Temperature=Heated]*[Injured=Intact]*[Timepoint=1]	-3.39628	8.46736	1	1	-21.306	14.5135
[truncated: 1,466 more rows]
