# Supplementary material for: Exposure to elevated sea-surface temperatures below the bleaching threshold impairs coral recovery and regeneration following injury
Source: PeerJ. 2017 Aug 18;5:e3719. doi: 10.7717/peerj.3719 (PMC5564385; doi:10.7717/peerj.3719)
Supplement: Supplemental Information 2 [file peerj-05-3719-s002.xlsx]

## Sheet: Sheet1
		Area	Mean	InDensity	RawInDensity
Ambient 2	1	7078	46.116	326407	326407		Ambient Injured	Thermal Stress Injured
	2	1892	1.846	3492	3492		301634	452502
Ambient 4	3	15855	74.047	1174019	1174019		1118526	1086128
	4	2188	1.846	11522	11522		2275598	1084681
Ambient 6	5	26691	88.757	2369017	2369017		2445177	1023133
	6	688	3.185	2191	2191		2376826	813137
Ambient 8	7	30895	82.645	2553310	2553310		1357605	739983
	8	1960	4.285	8398	8398		864628	227531
Ambient 10	9	32402	76.854	2490233	2490233		352983
	10	1268	4.812	6101	6101
Ambient 12	11	32517	44.045	1432202	1432202
	12	1414	5	7070	7070
		1.846
		1.846
		3.185
		4.285
		4.812
		5
	Average Bk	3.49567
Temp 2	1	8269	60.105	497006	497006
	2	2102	12.417	26101	26101
Temp 4	3	31569	34.92	1102386	1102386
	4	1718	4.477	7691	7691
Temp 6	5	40537	32.198	1305203	1305203
	6	1795	2.973	5337	5337
Temp 8	7	25325	45.84	1160901	1160901
	8	2836	3.329	9442	9442
Temp 10	9	25792	36.967	953446	953446
	10	1467	3.456	5070	5070
Temp 12	11	22842	37.836	864244	864244
	12	2025	6.04	12231	12231
			12.417				CTCF
			4.477				1468464
			2.973				930650
			3.329				1084681
			3.456				1023133
			6.04				813137
		Average	5.44867				739983
